# Supplementary material for: Synthesis and Biological Evaluation of Benzo[b]thiophene Acylhydrazones as Antimicrobial Agents against Multidrug-Resistant Staphylococcus aureus
Source: MDPI journal article supplement (doi:10.3390/biom12010131), 2022-01-14

## Supplementary Materials

Figure S1.  $^1\text{H}$  and  $^{13}\text{C}$  NMR spectra for compounds **1b**, **2a**, **2b**, **2c**, **2d**, **2e**, **I.a**, **I.b**, **I.c**, **I.d**, **I.e**, **I.f**, **I.g**, **I.h**, **I.i**, **I.j**, **I.k**, **I.l**, **I.m**, **I.n**, **I.o**, **I.p**, **II.a**, **II.b**, **II.c**, **II.d**, **III.a**, **III.b**, **III.c**, **III.d**, **III.e** and **III.f**.

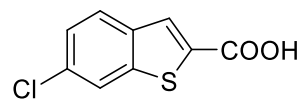

**1b**

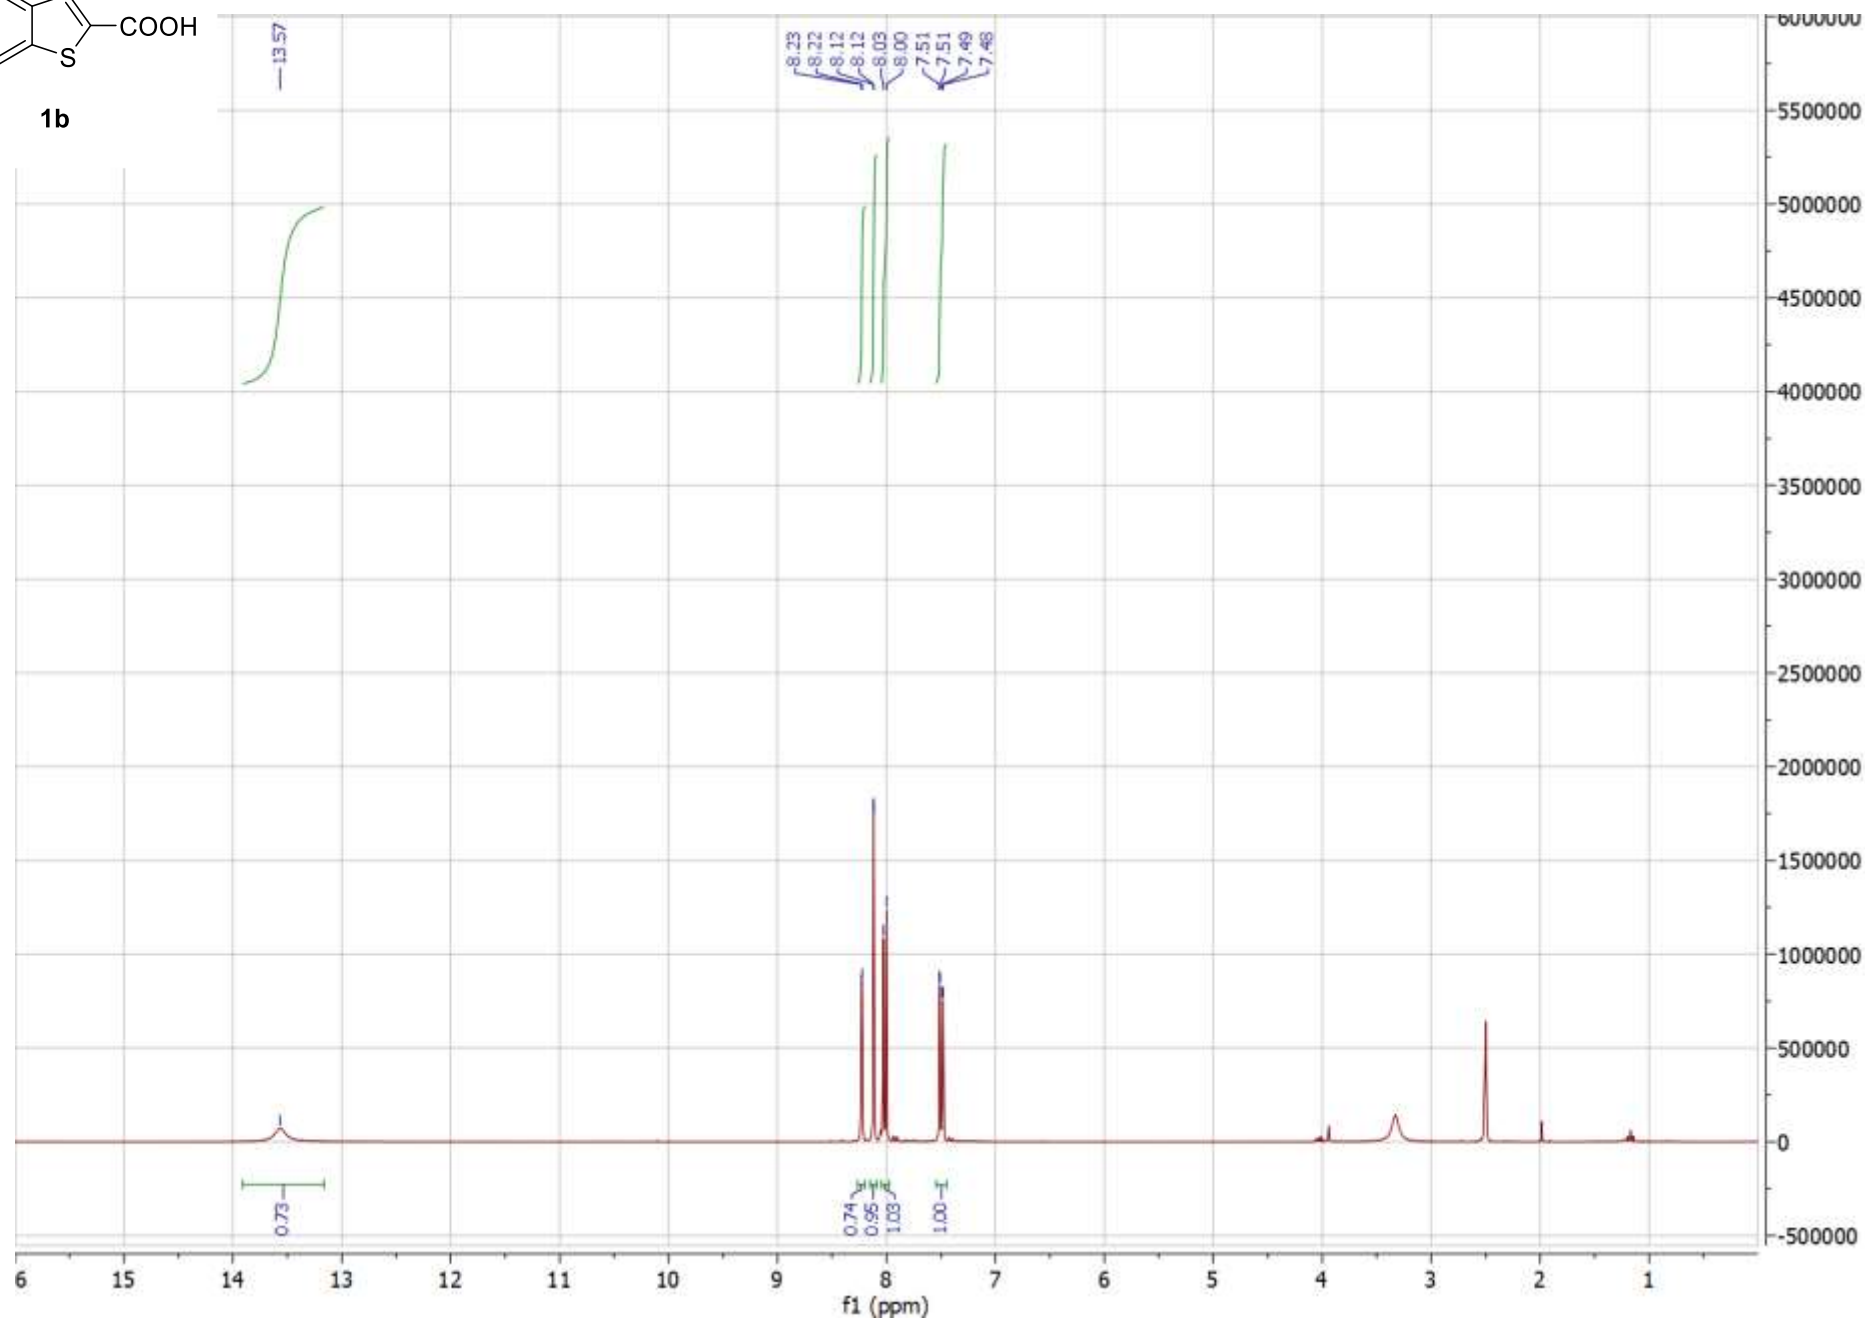

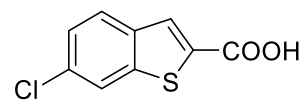

**1b**

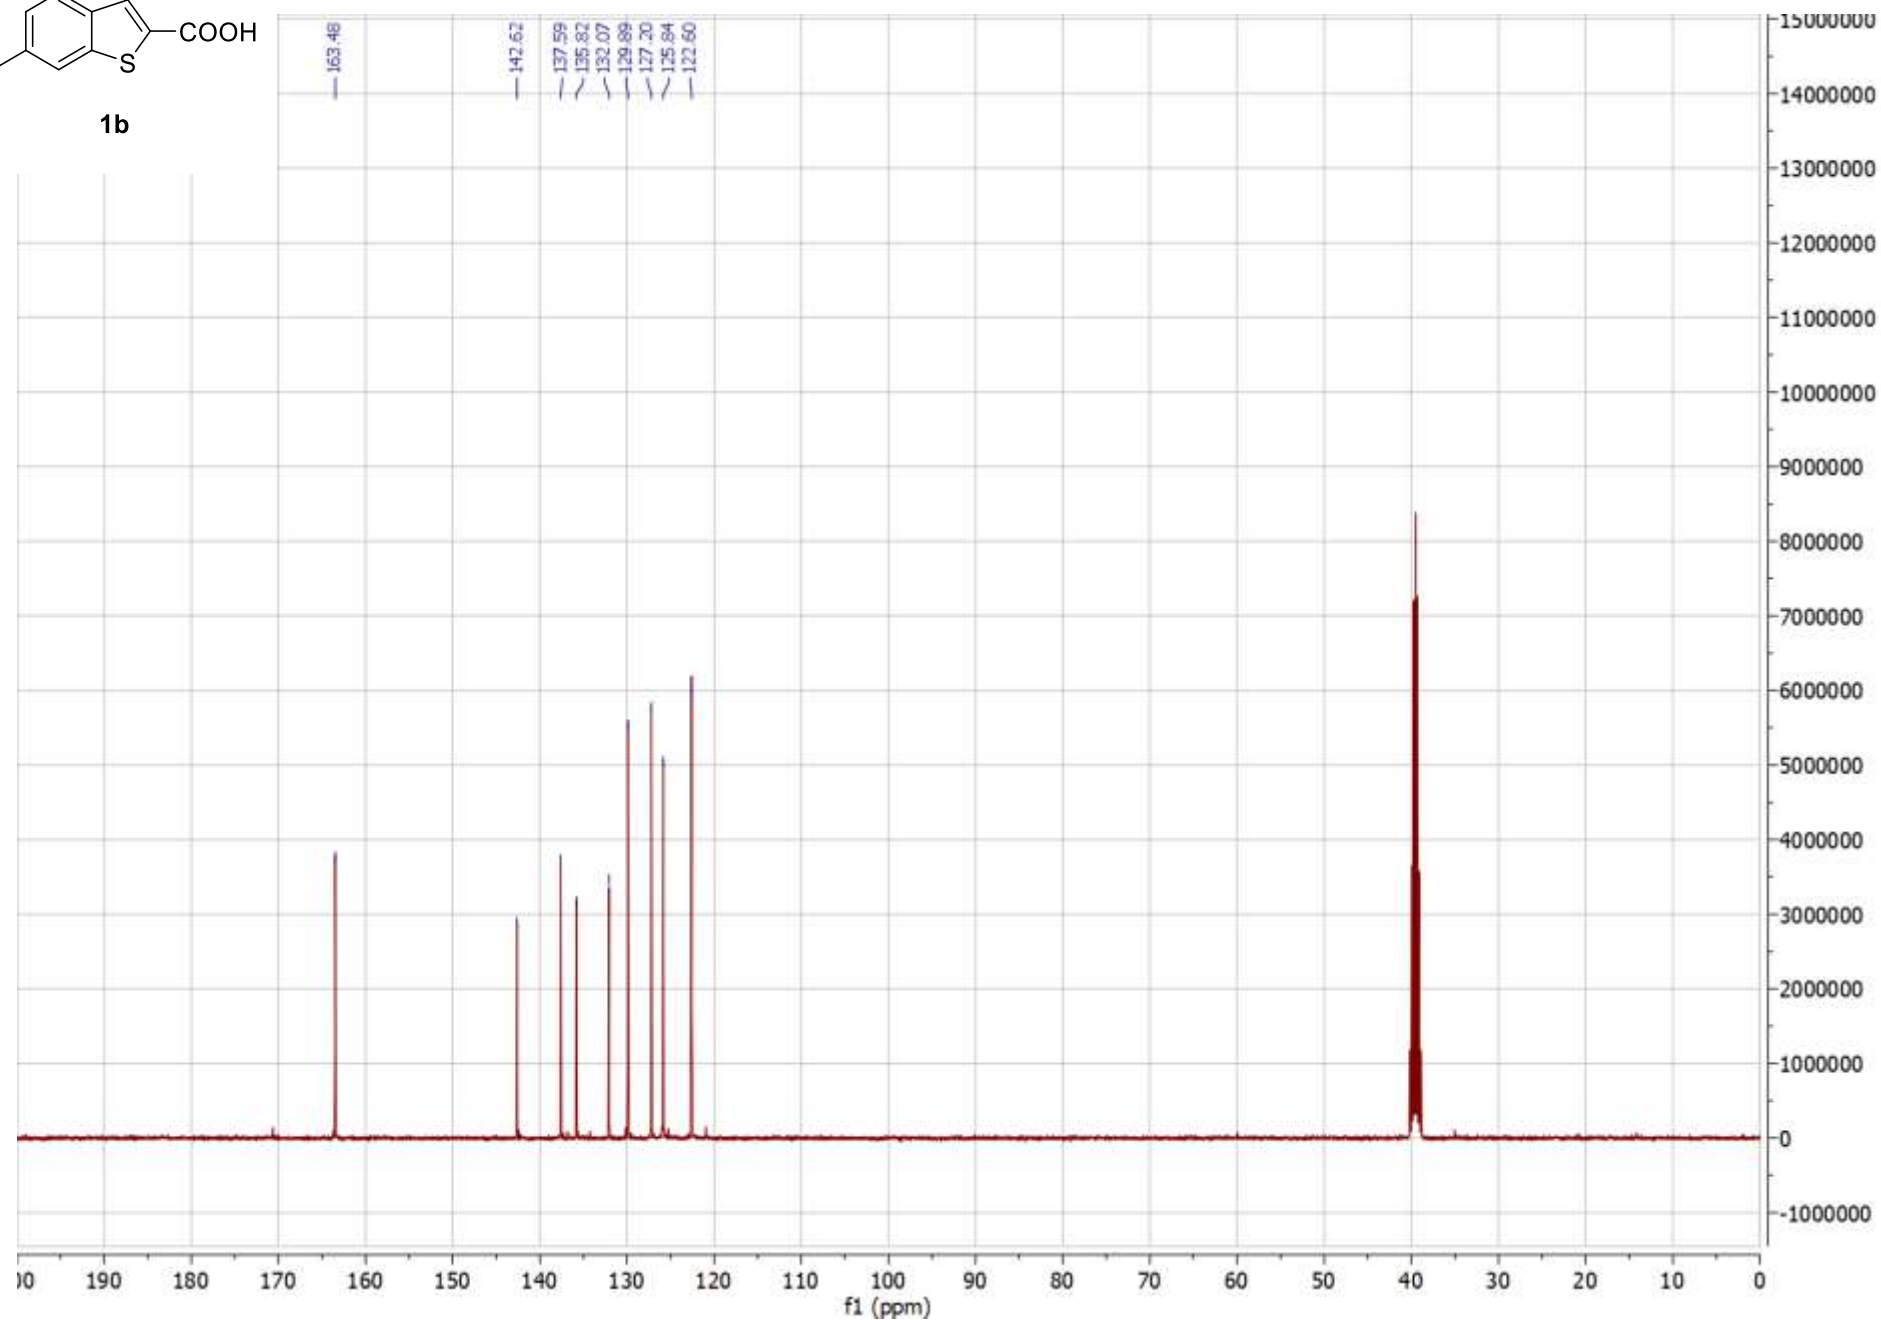

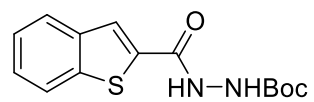

2a

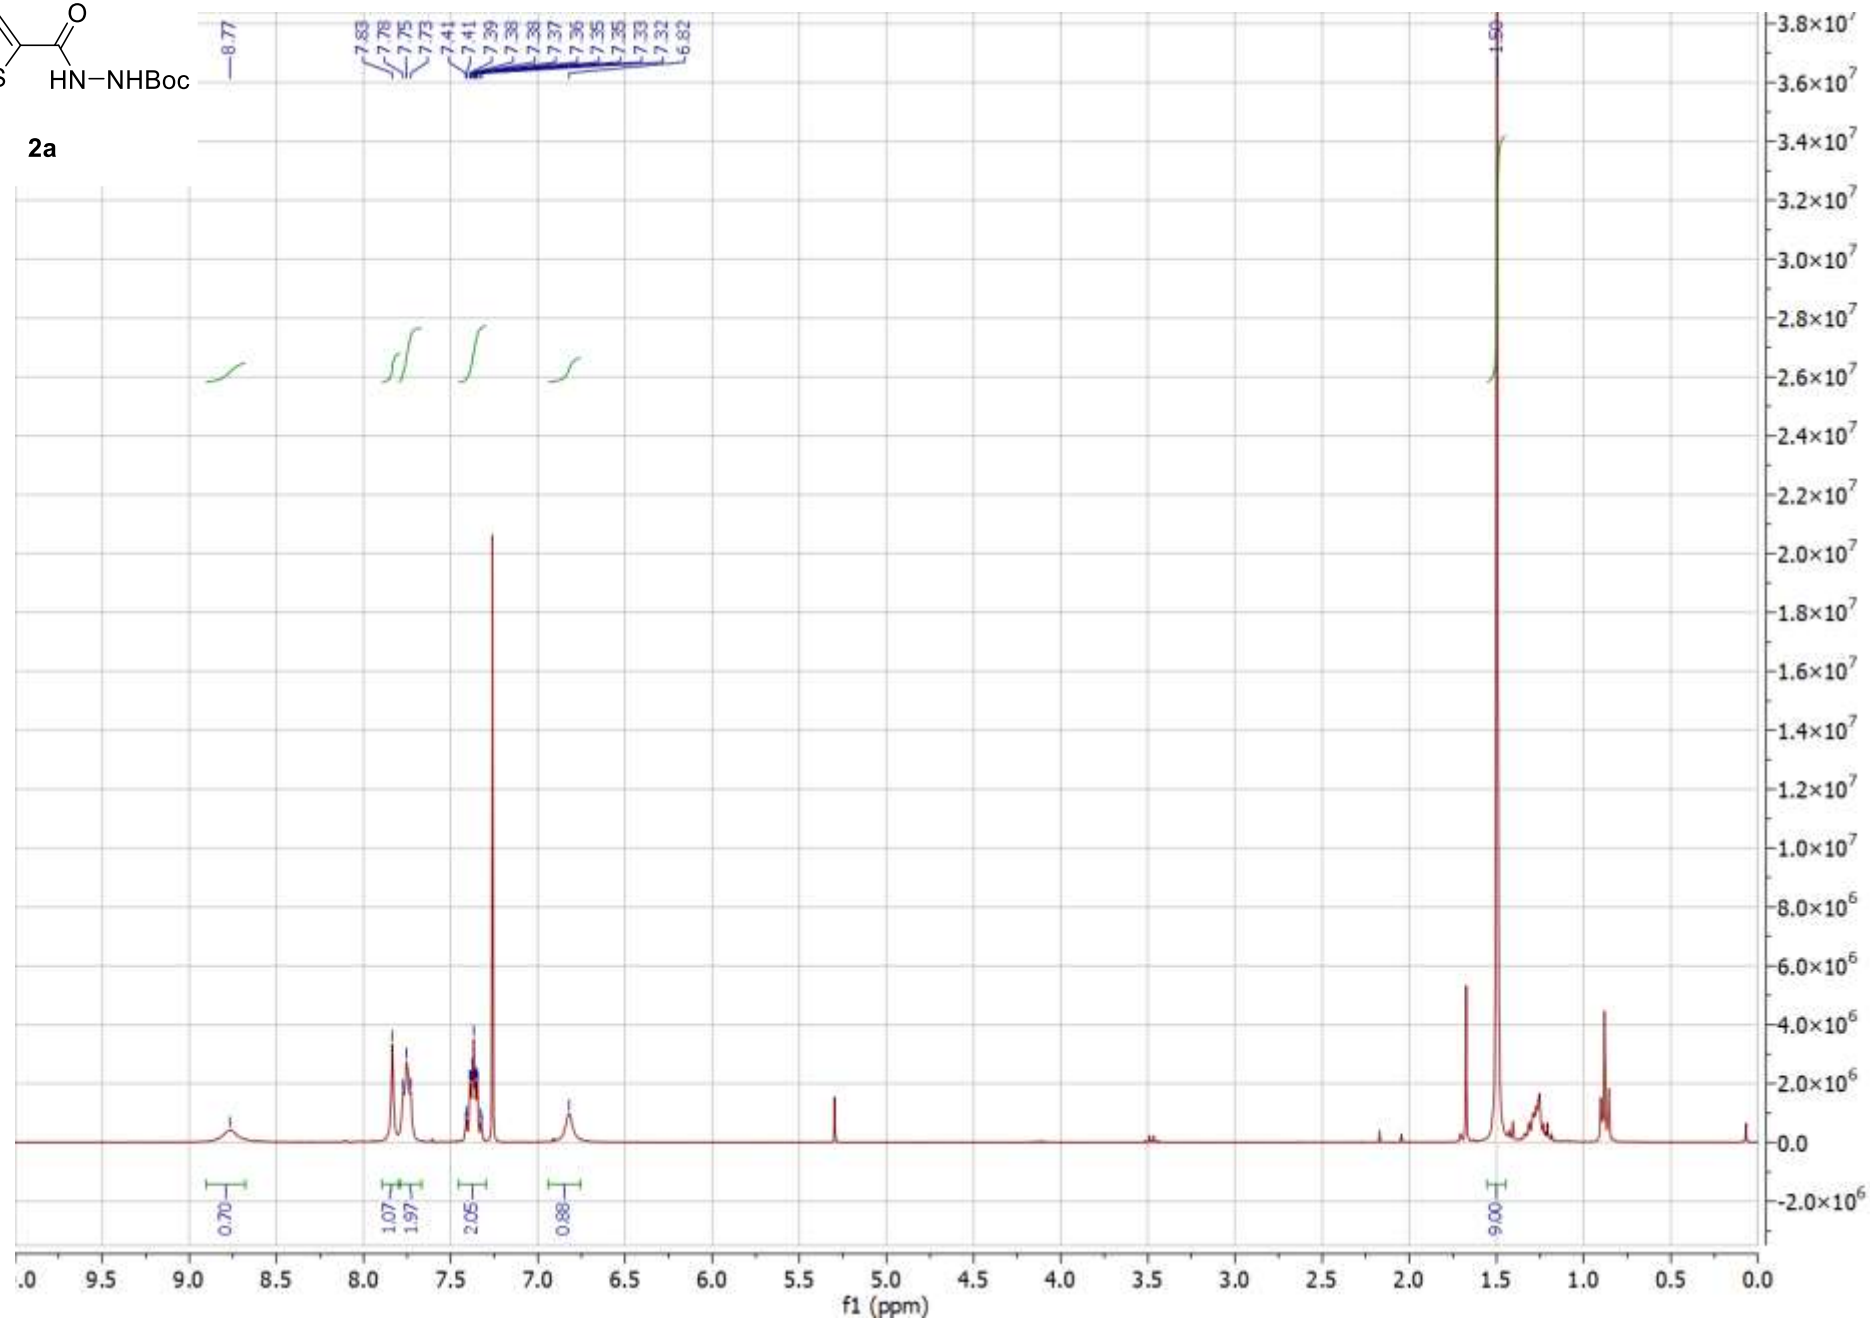

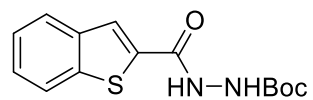

2a

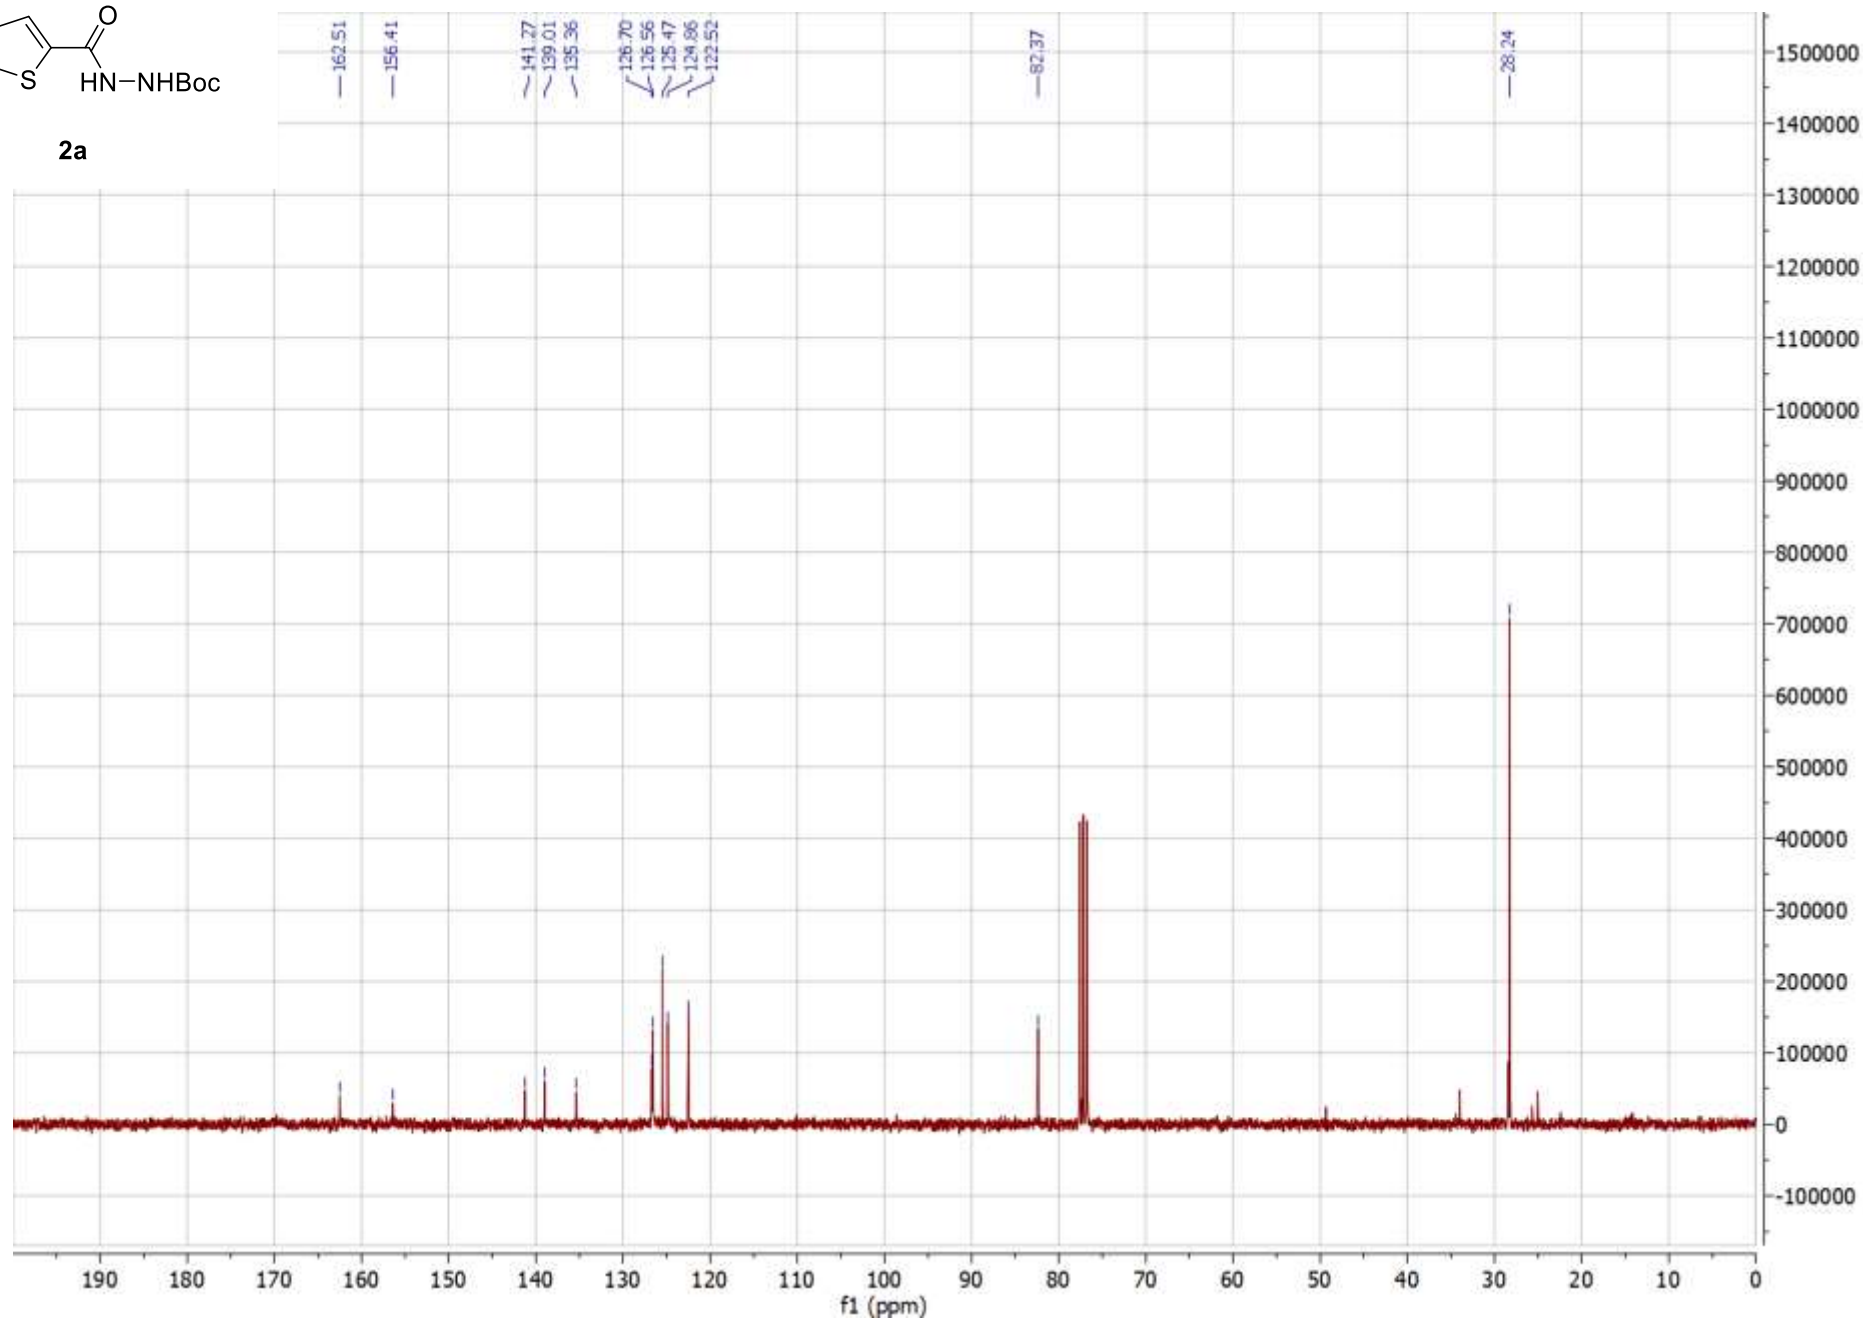

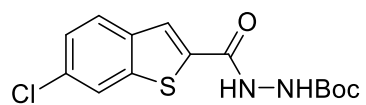

2b

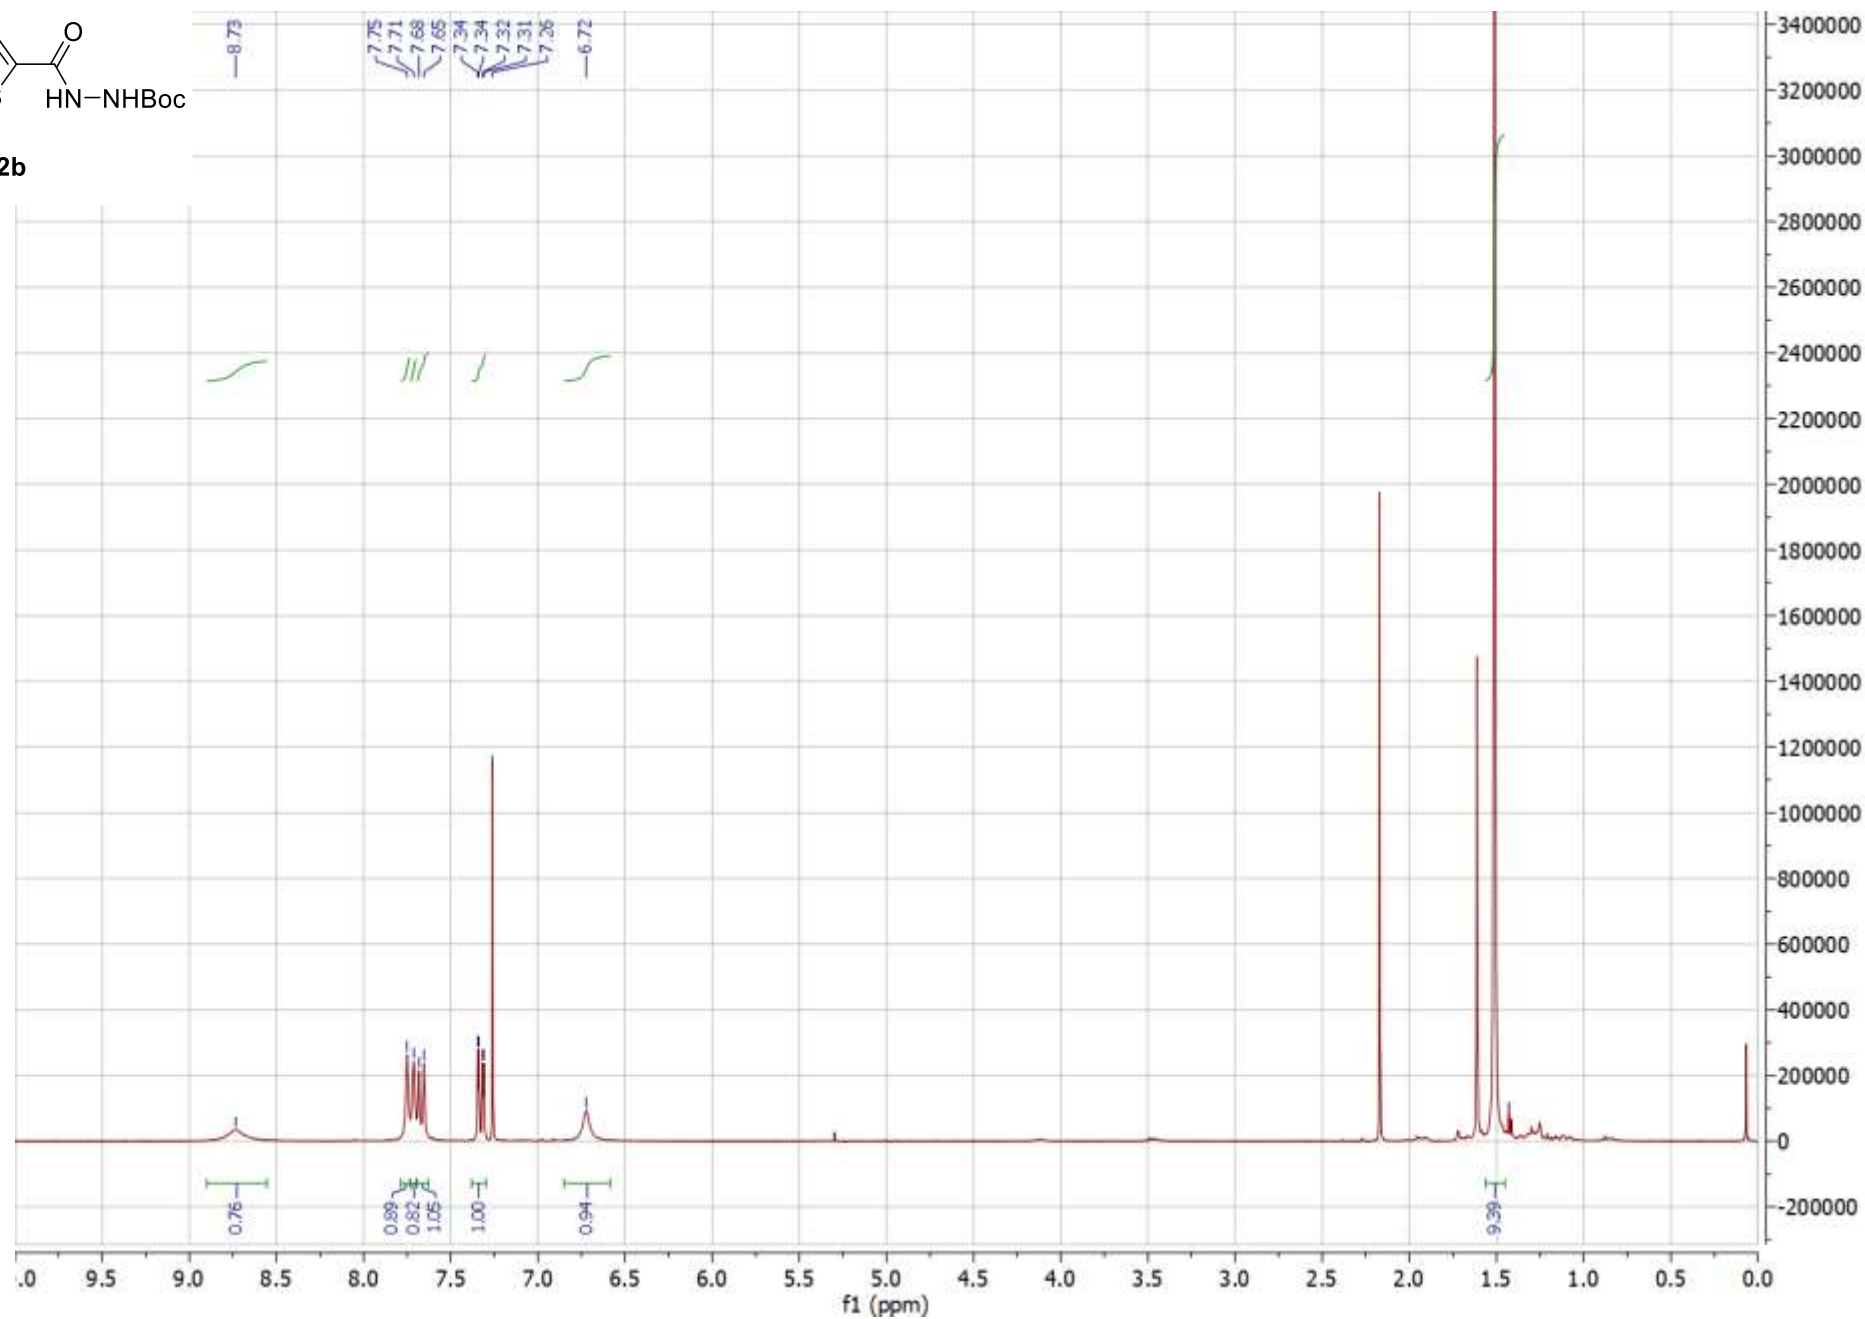

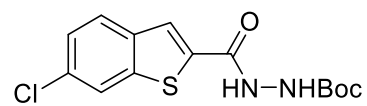

**2b**

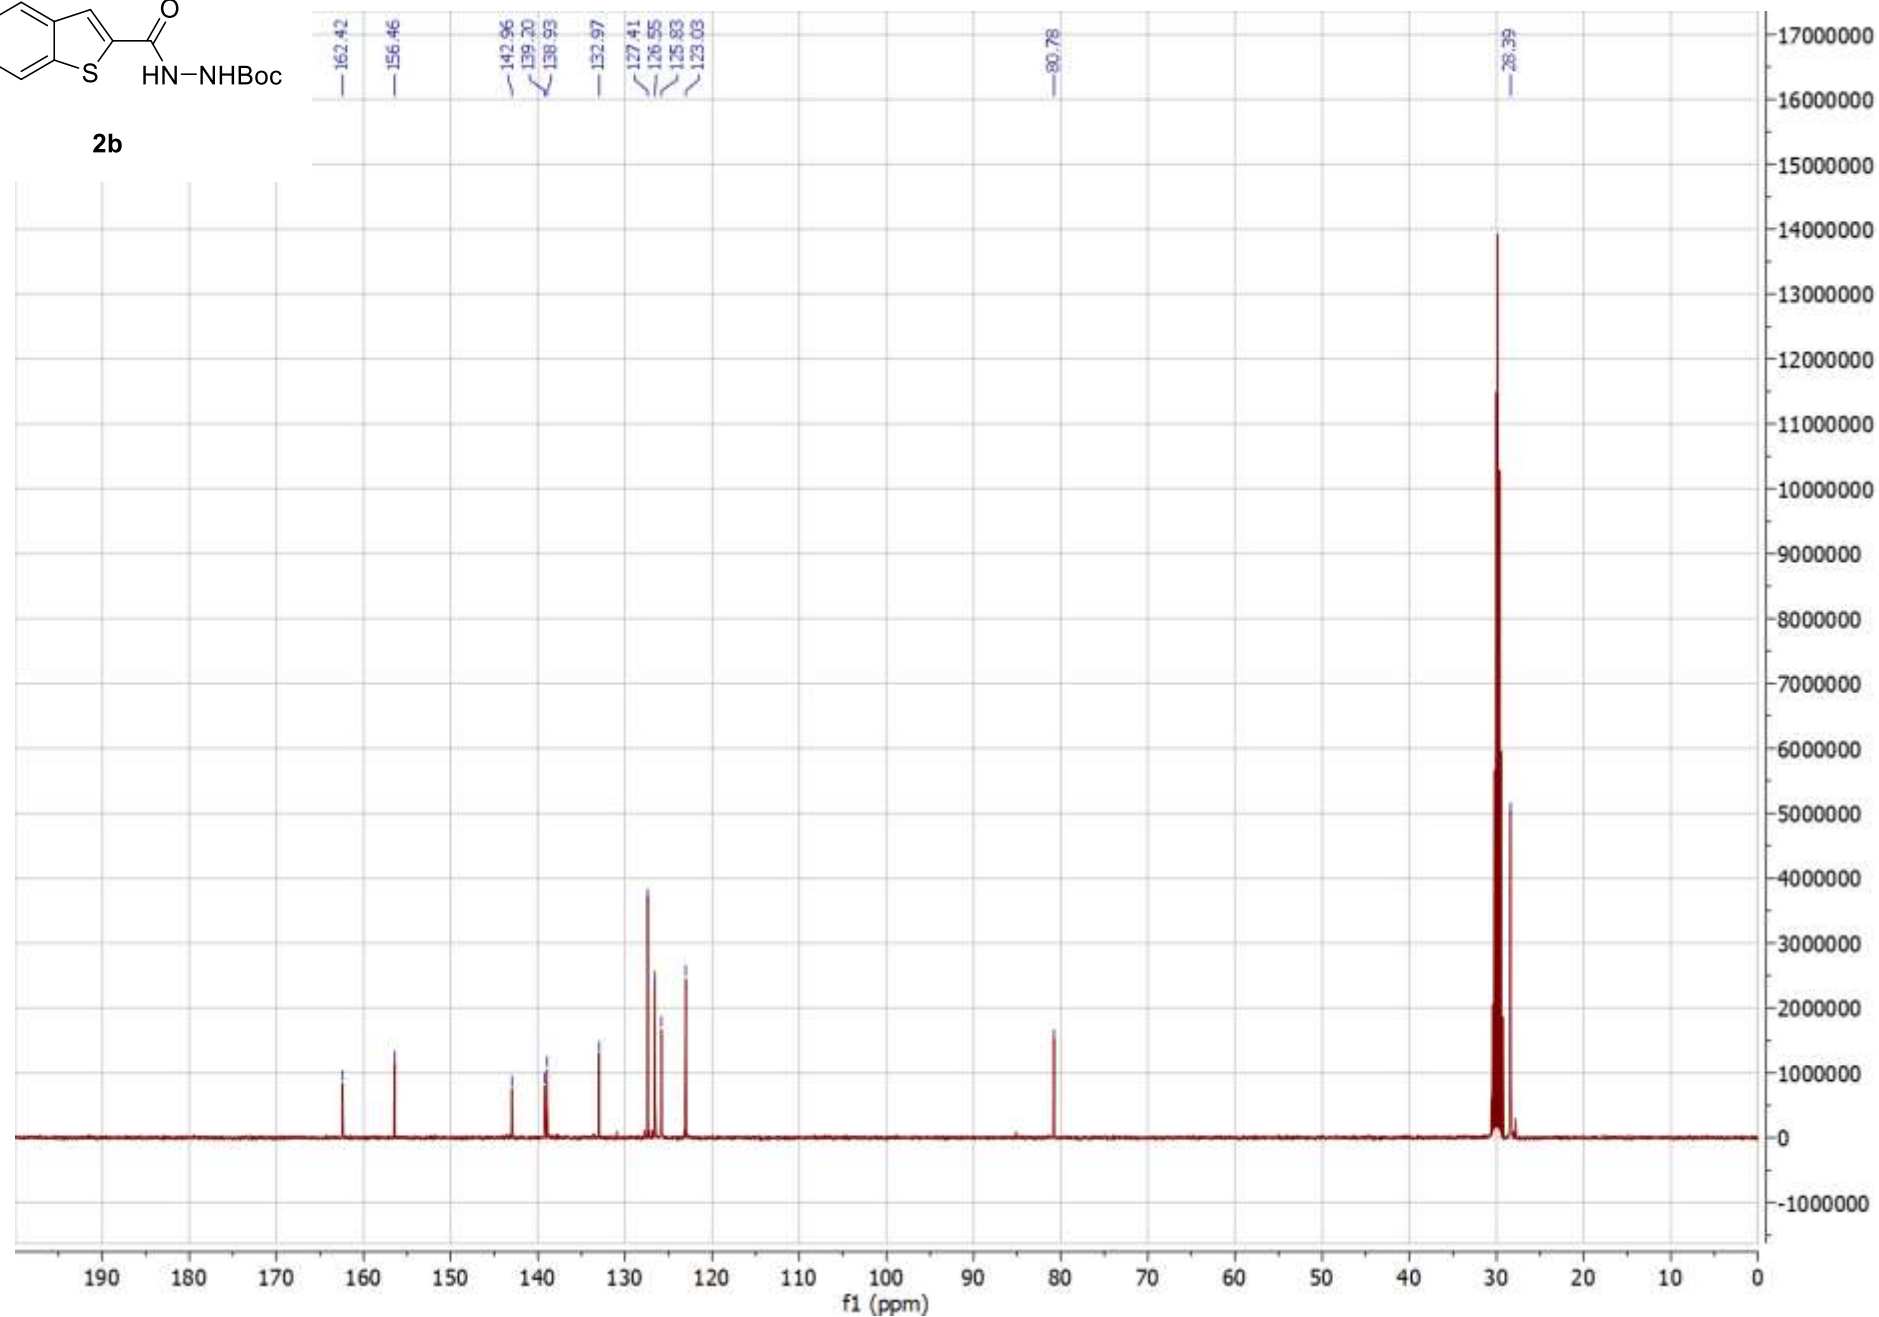

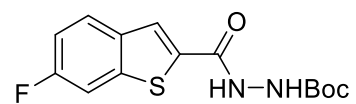

**2c**

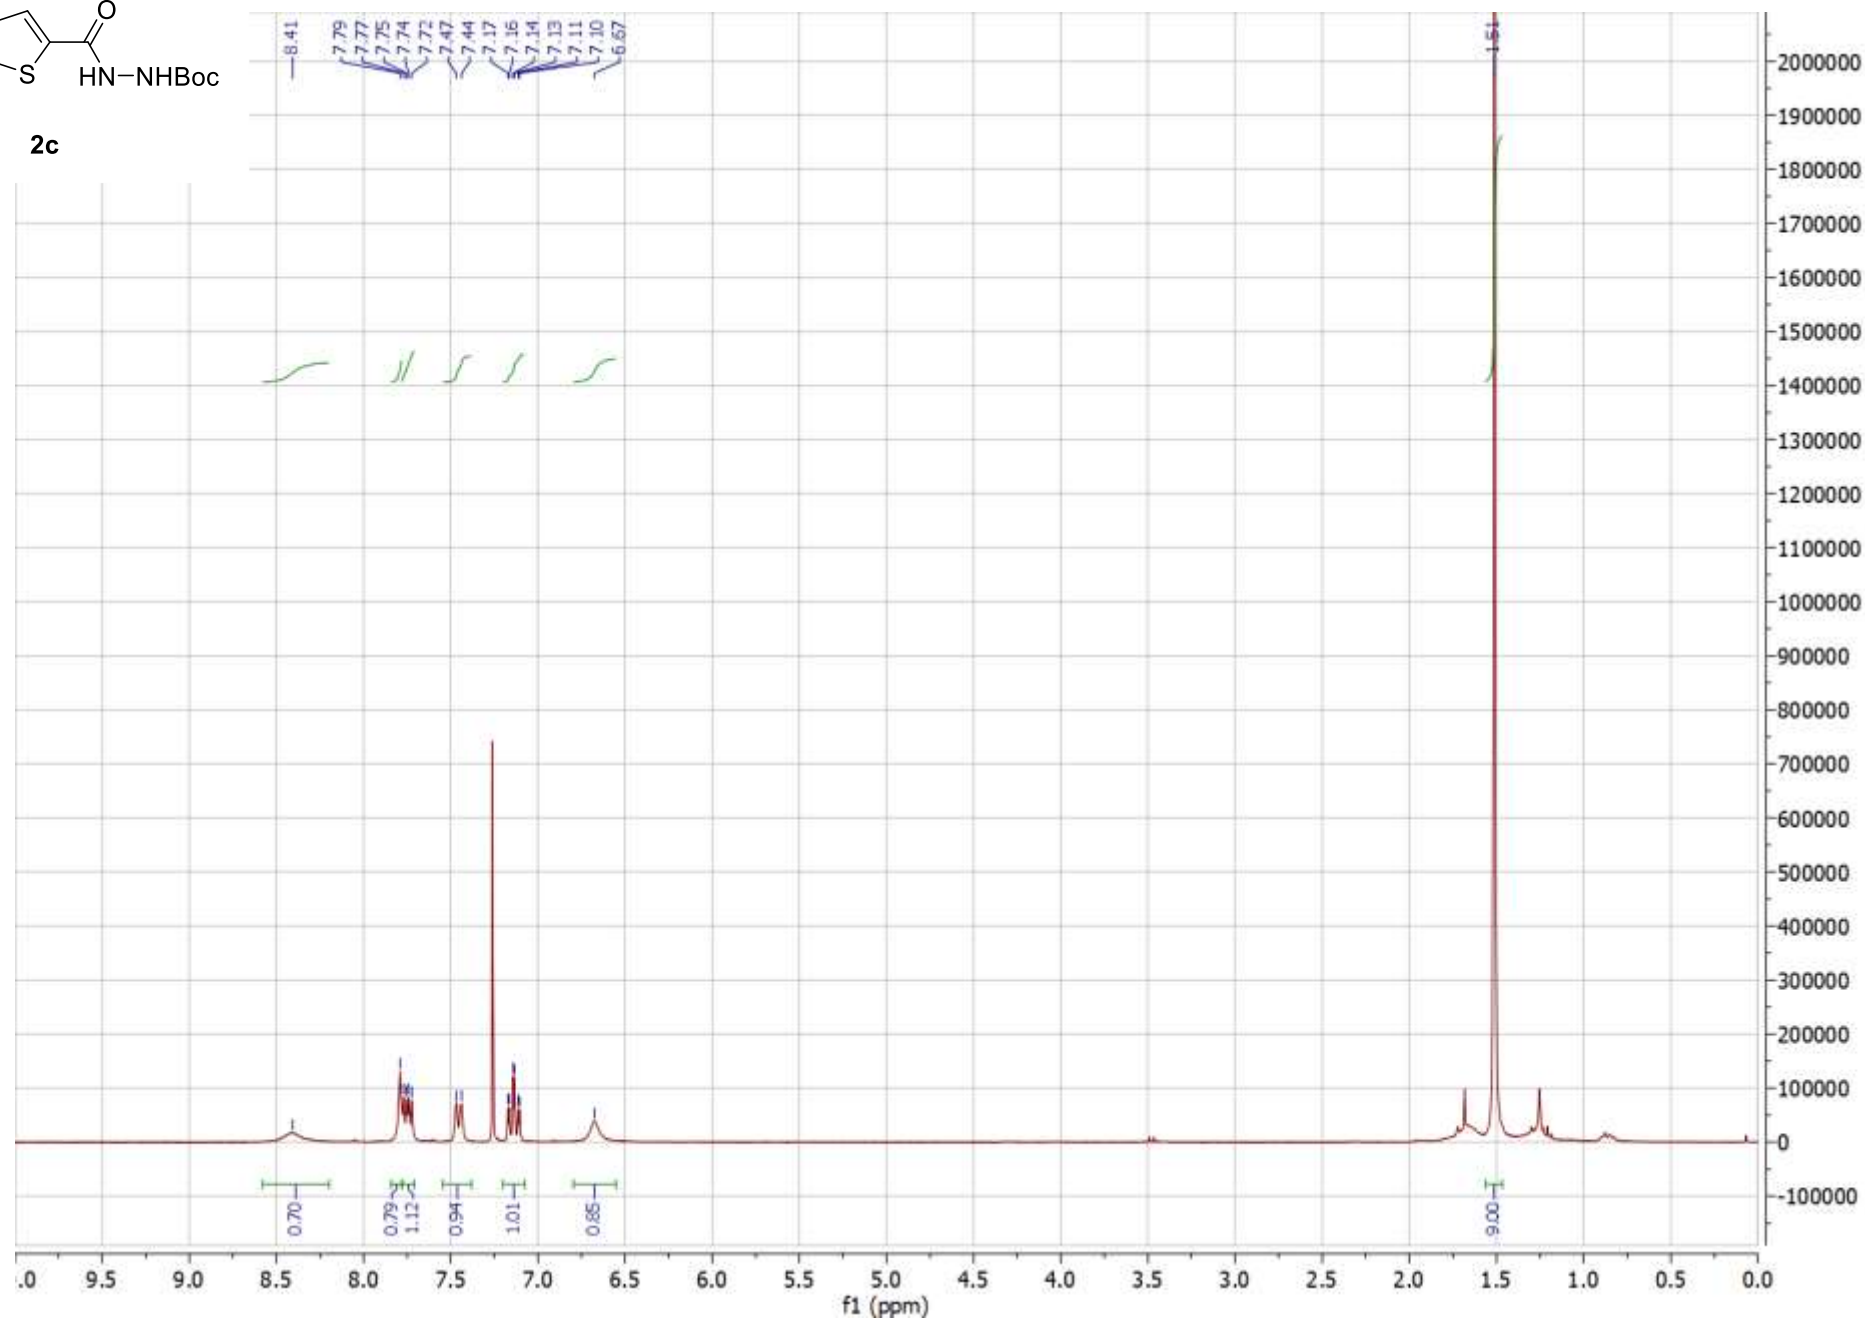



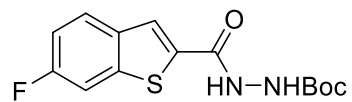

2c

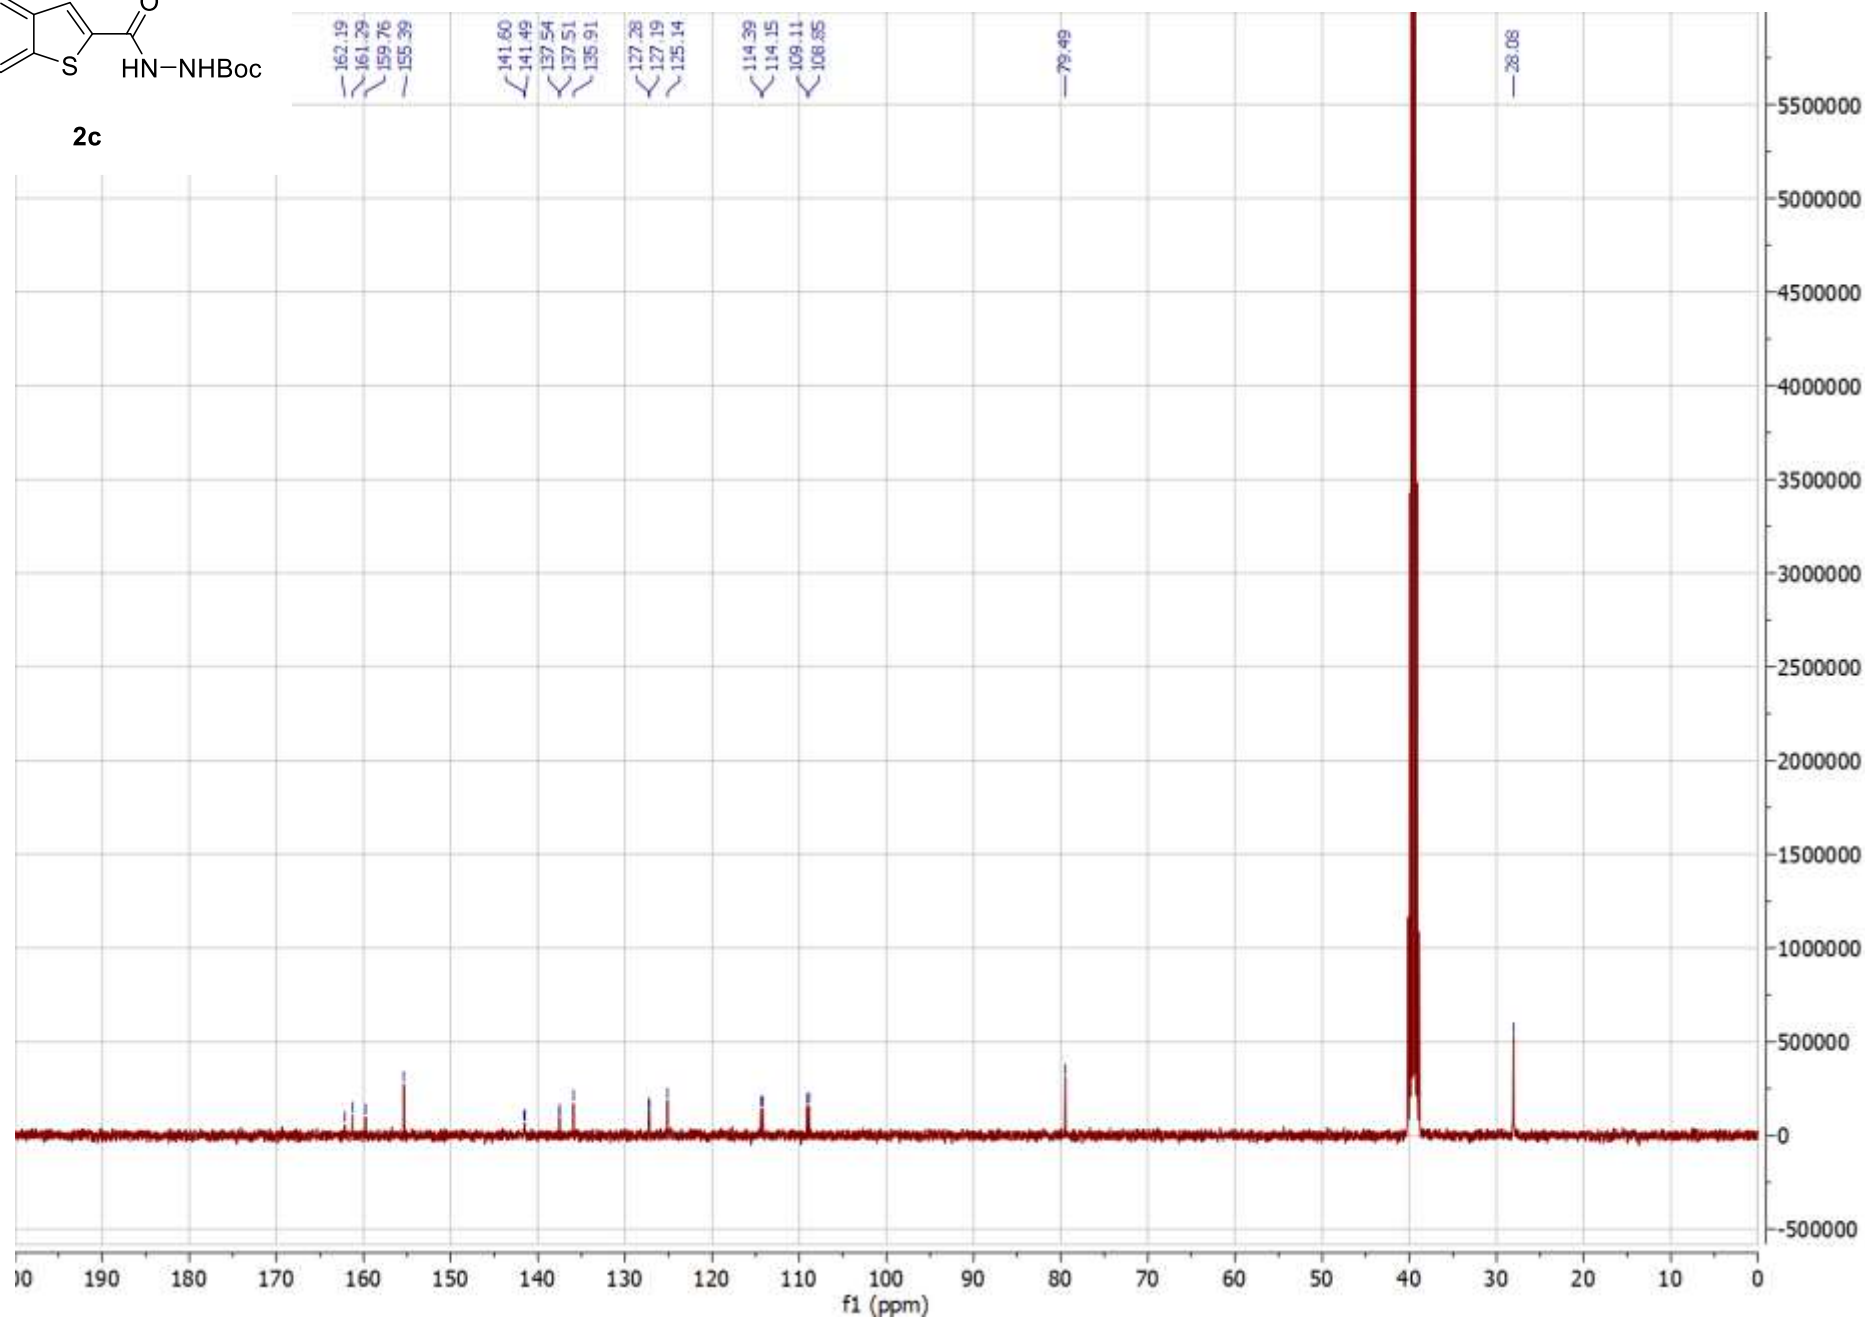

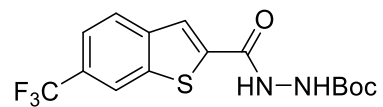

2d

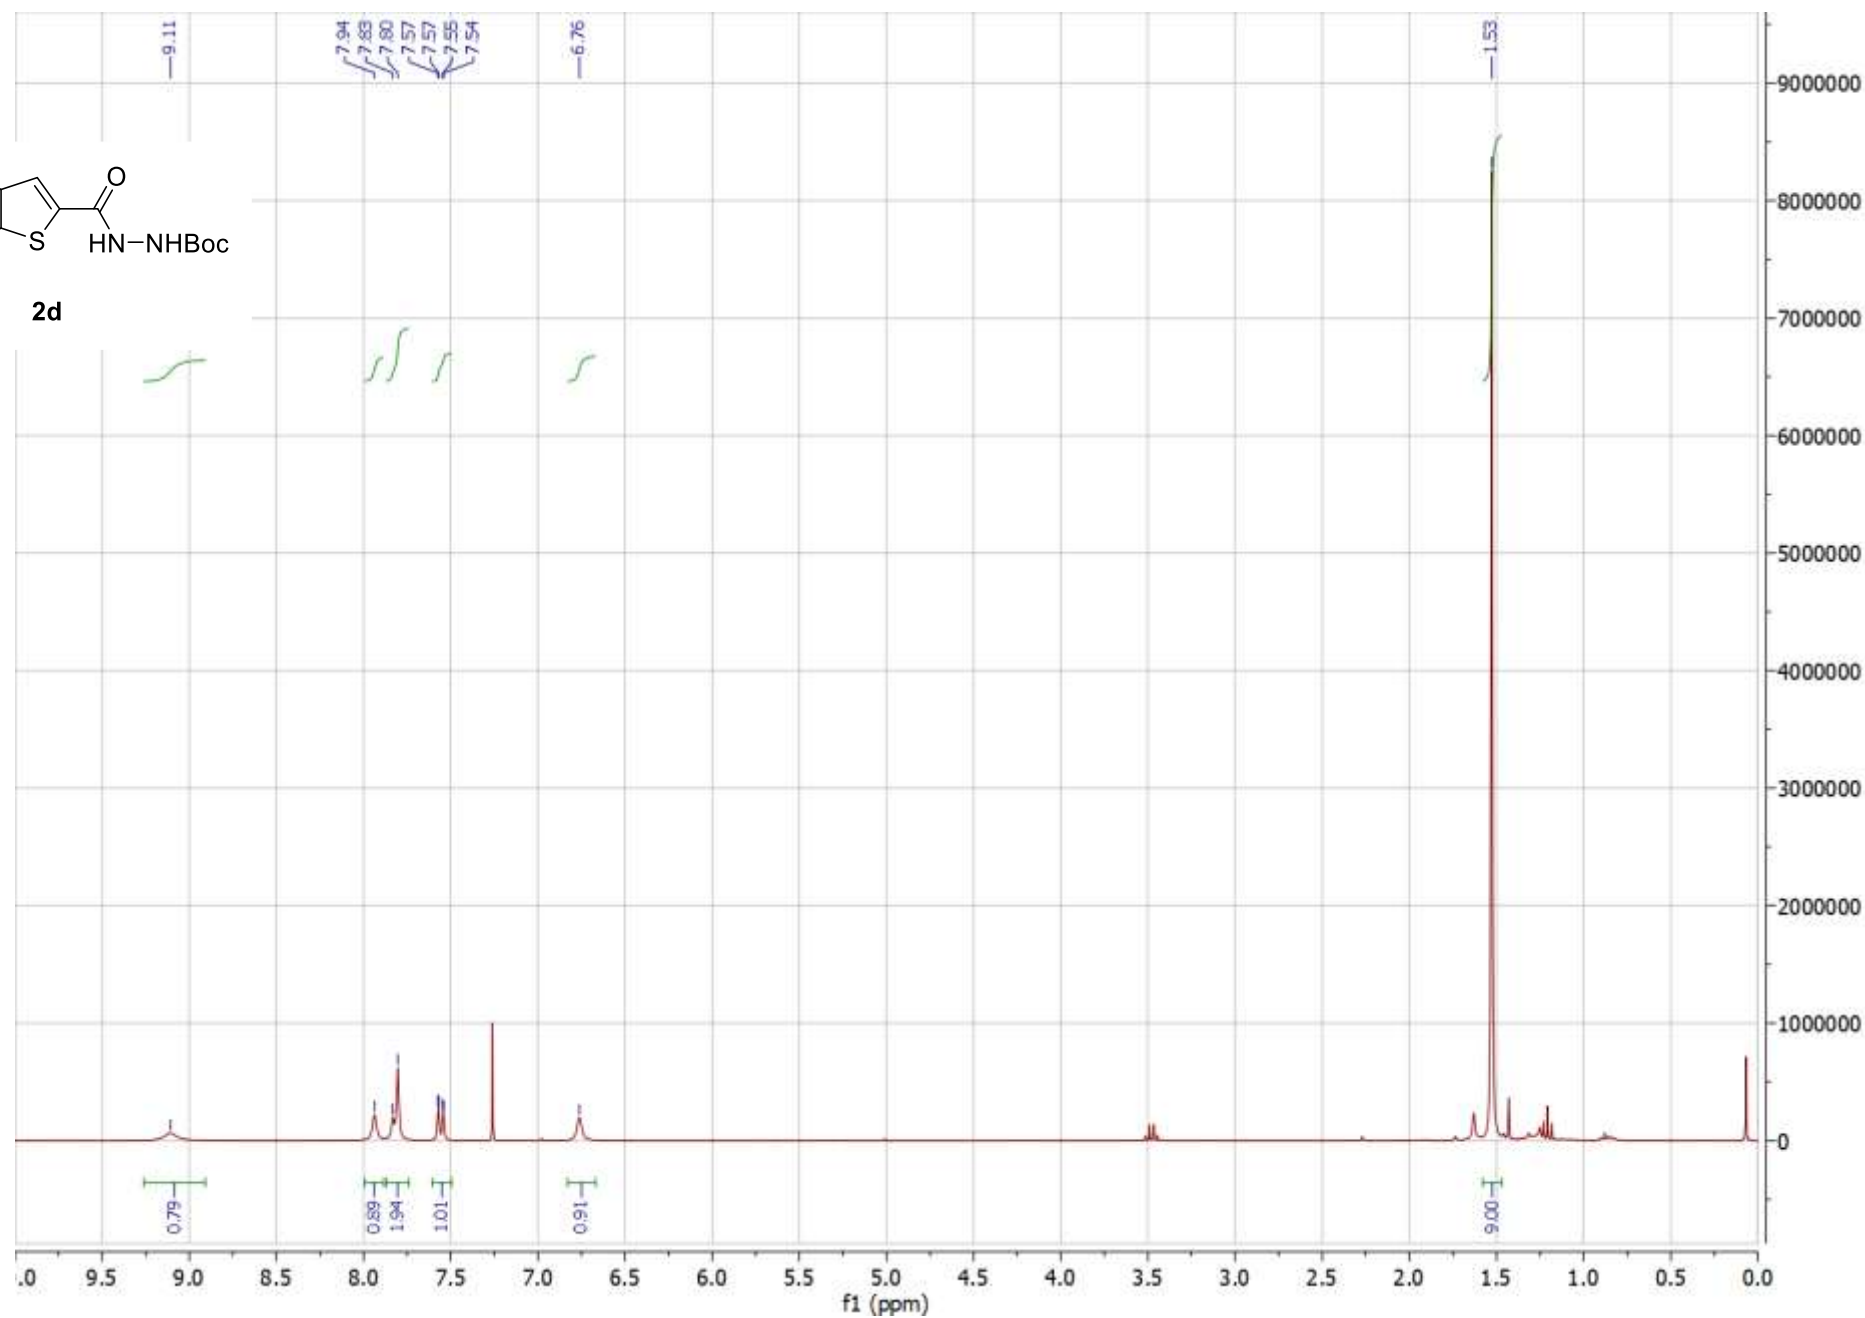

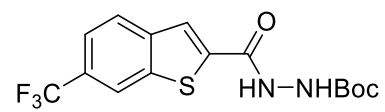

**2d**

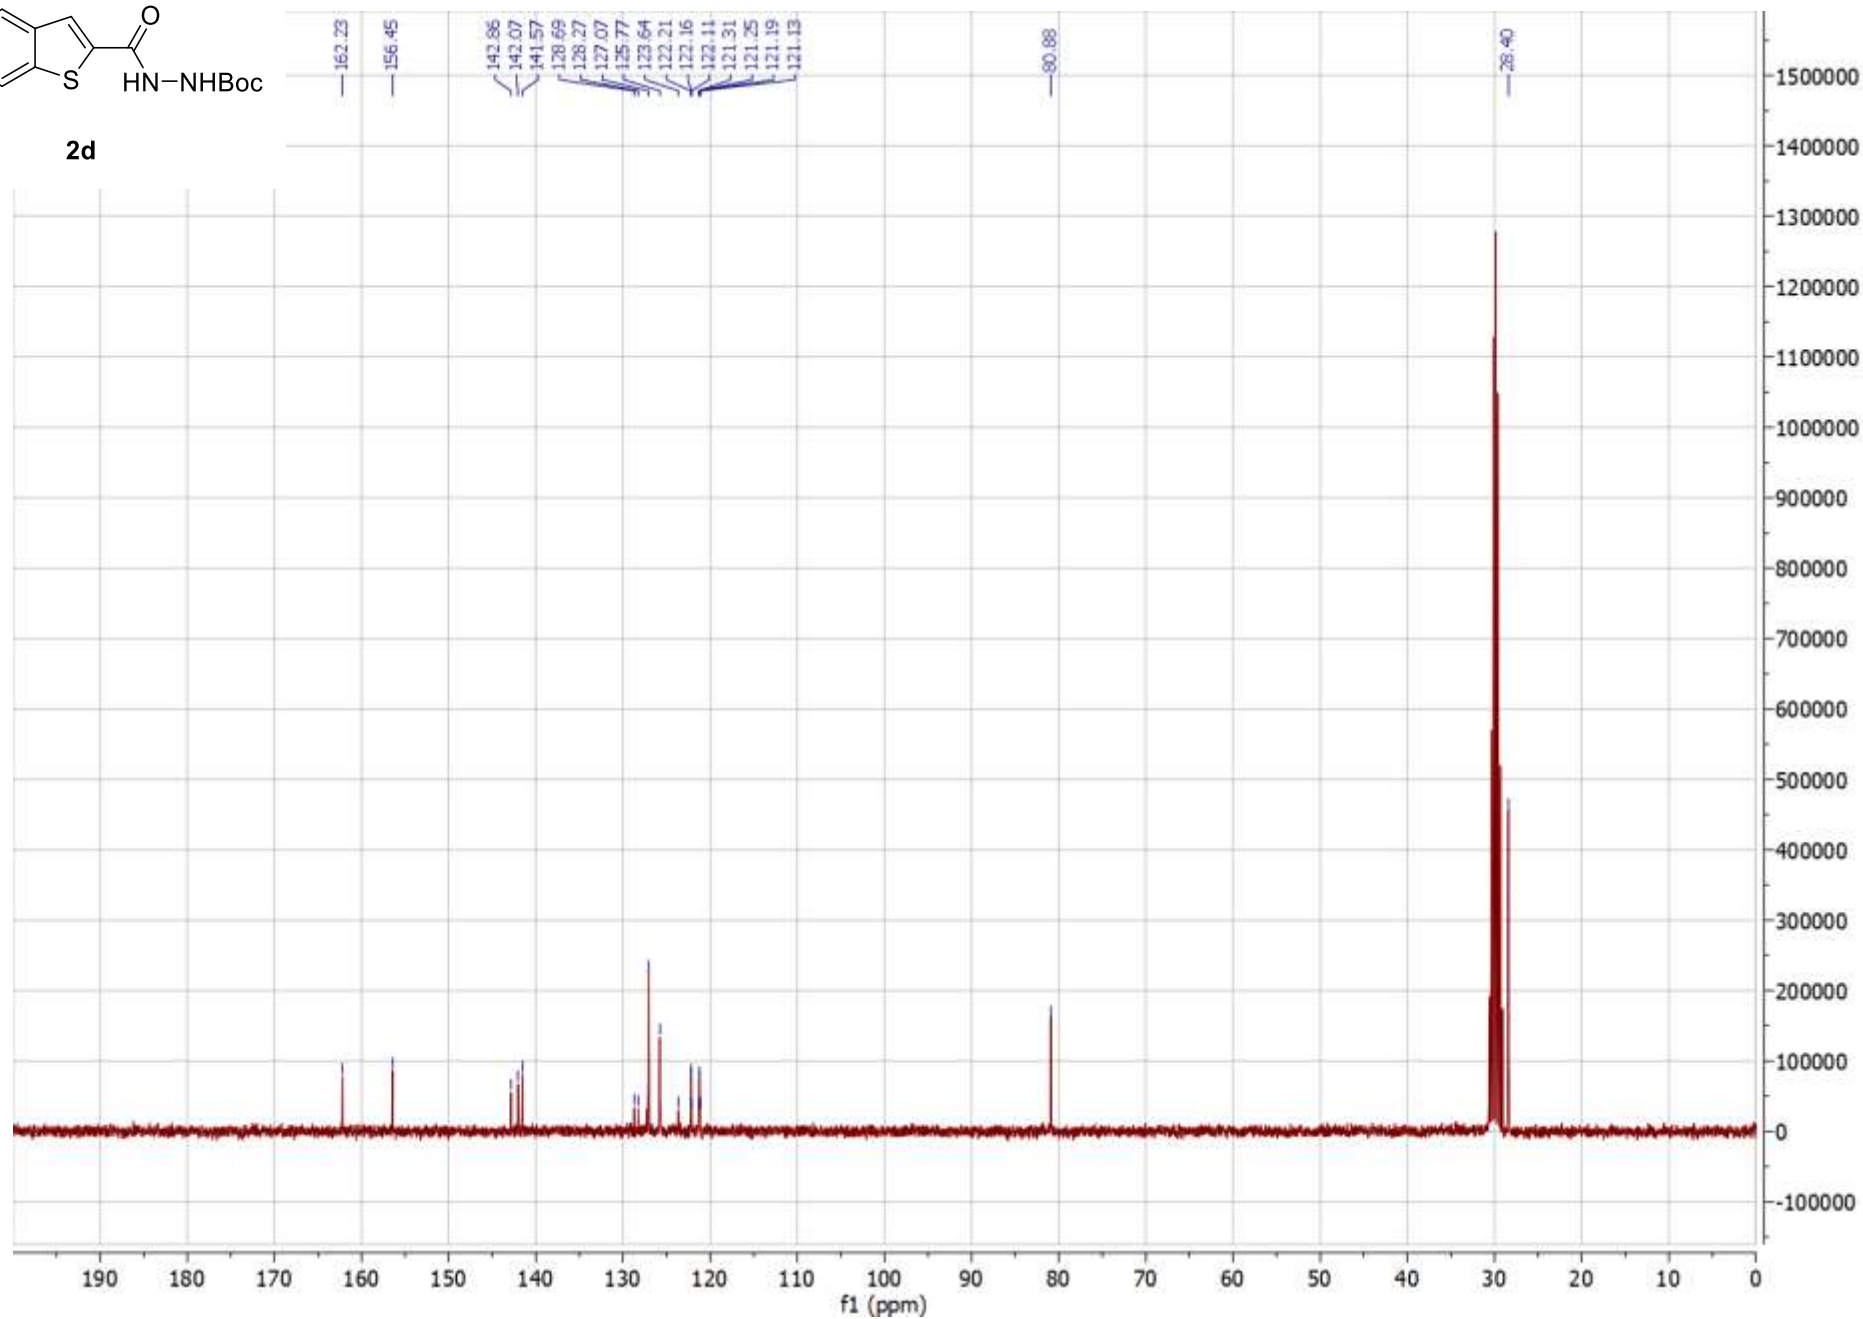

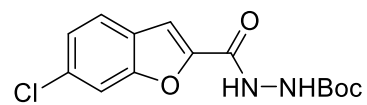

2e

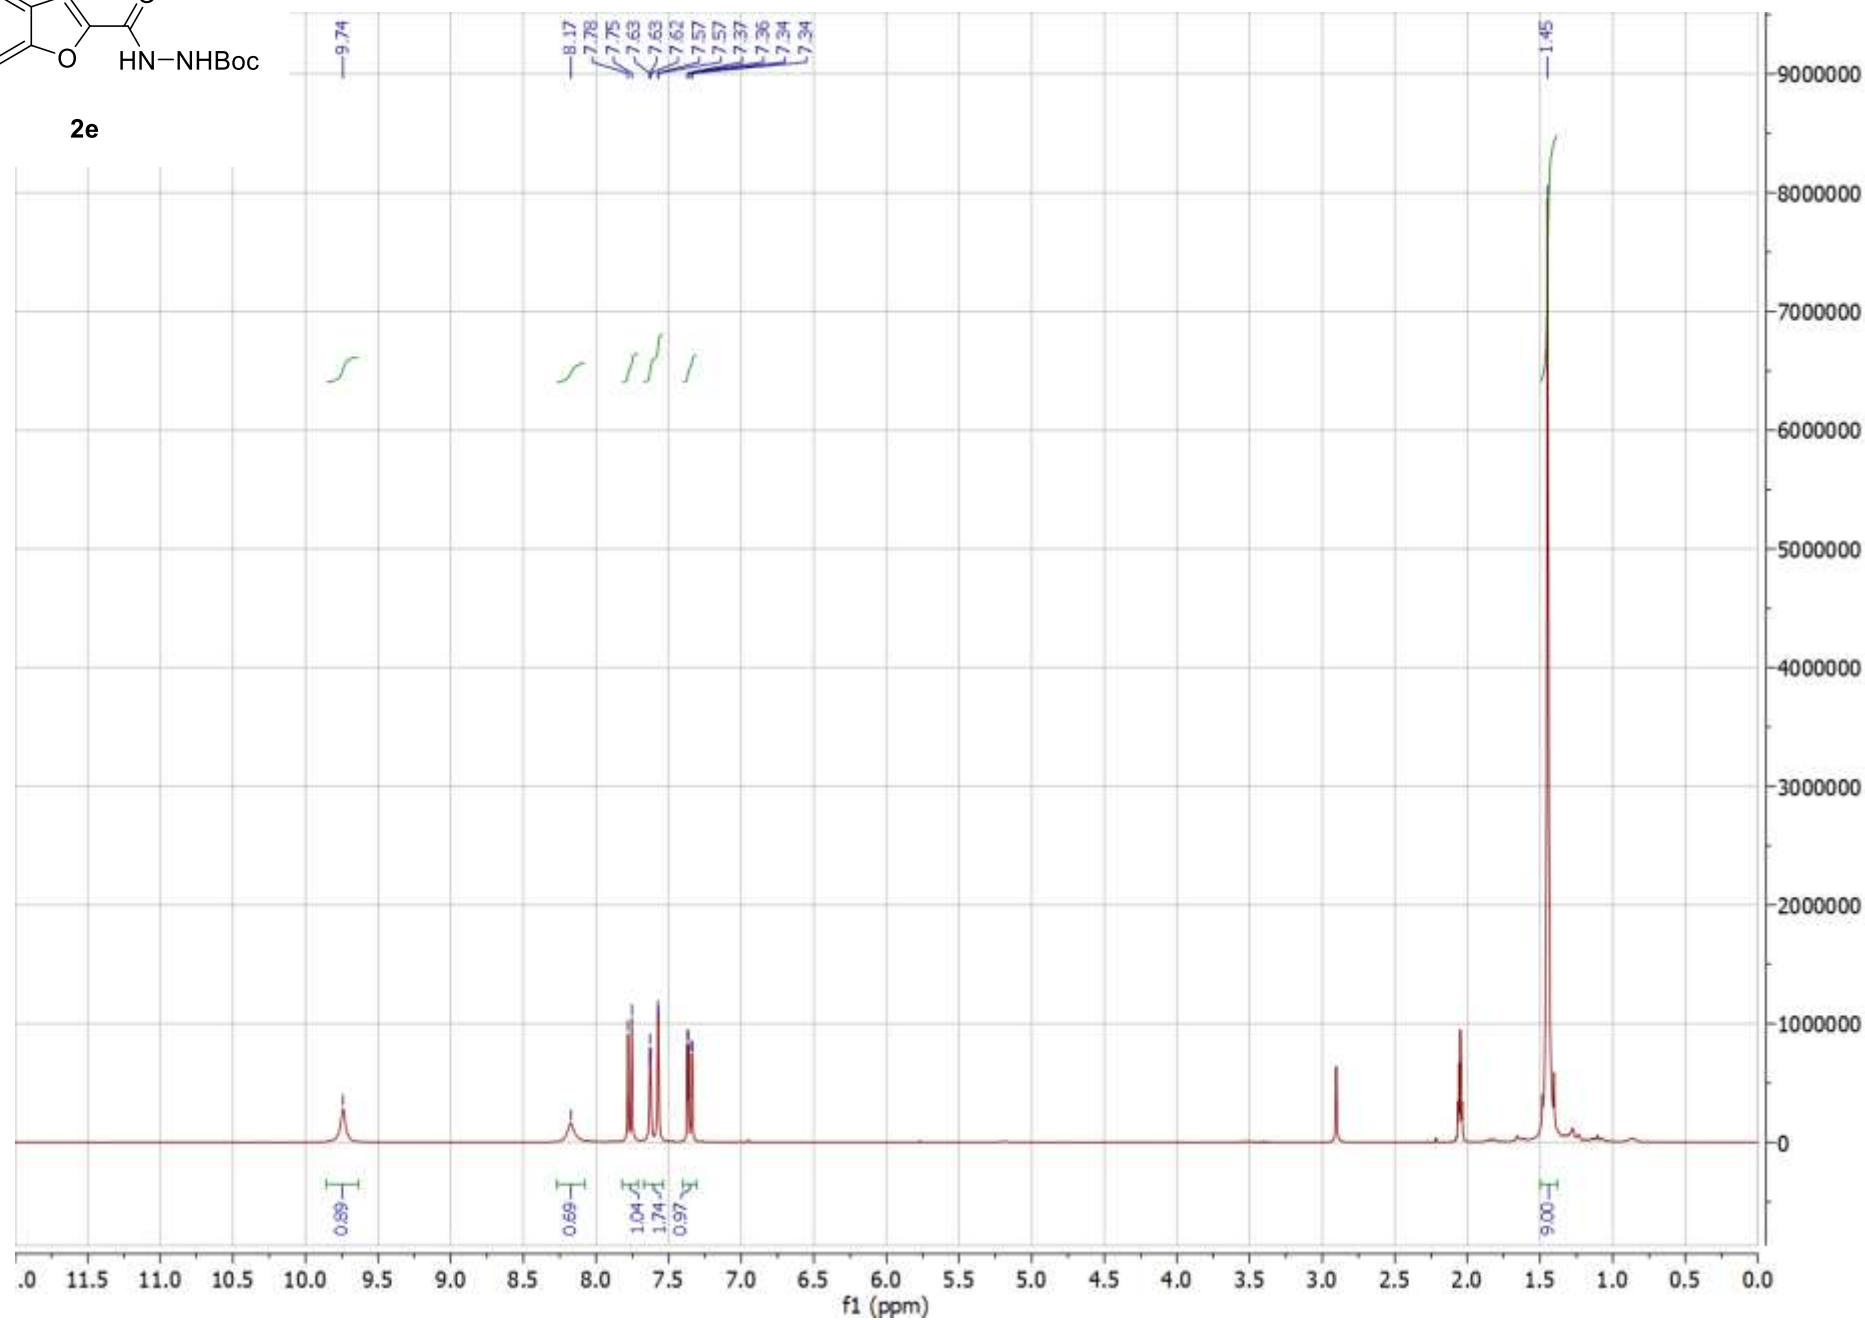

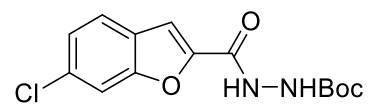

2e

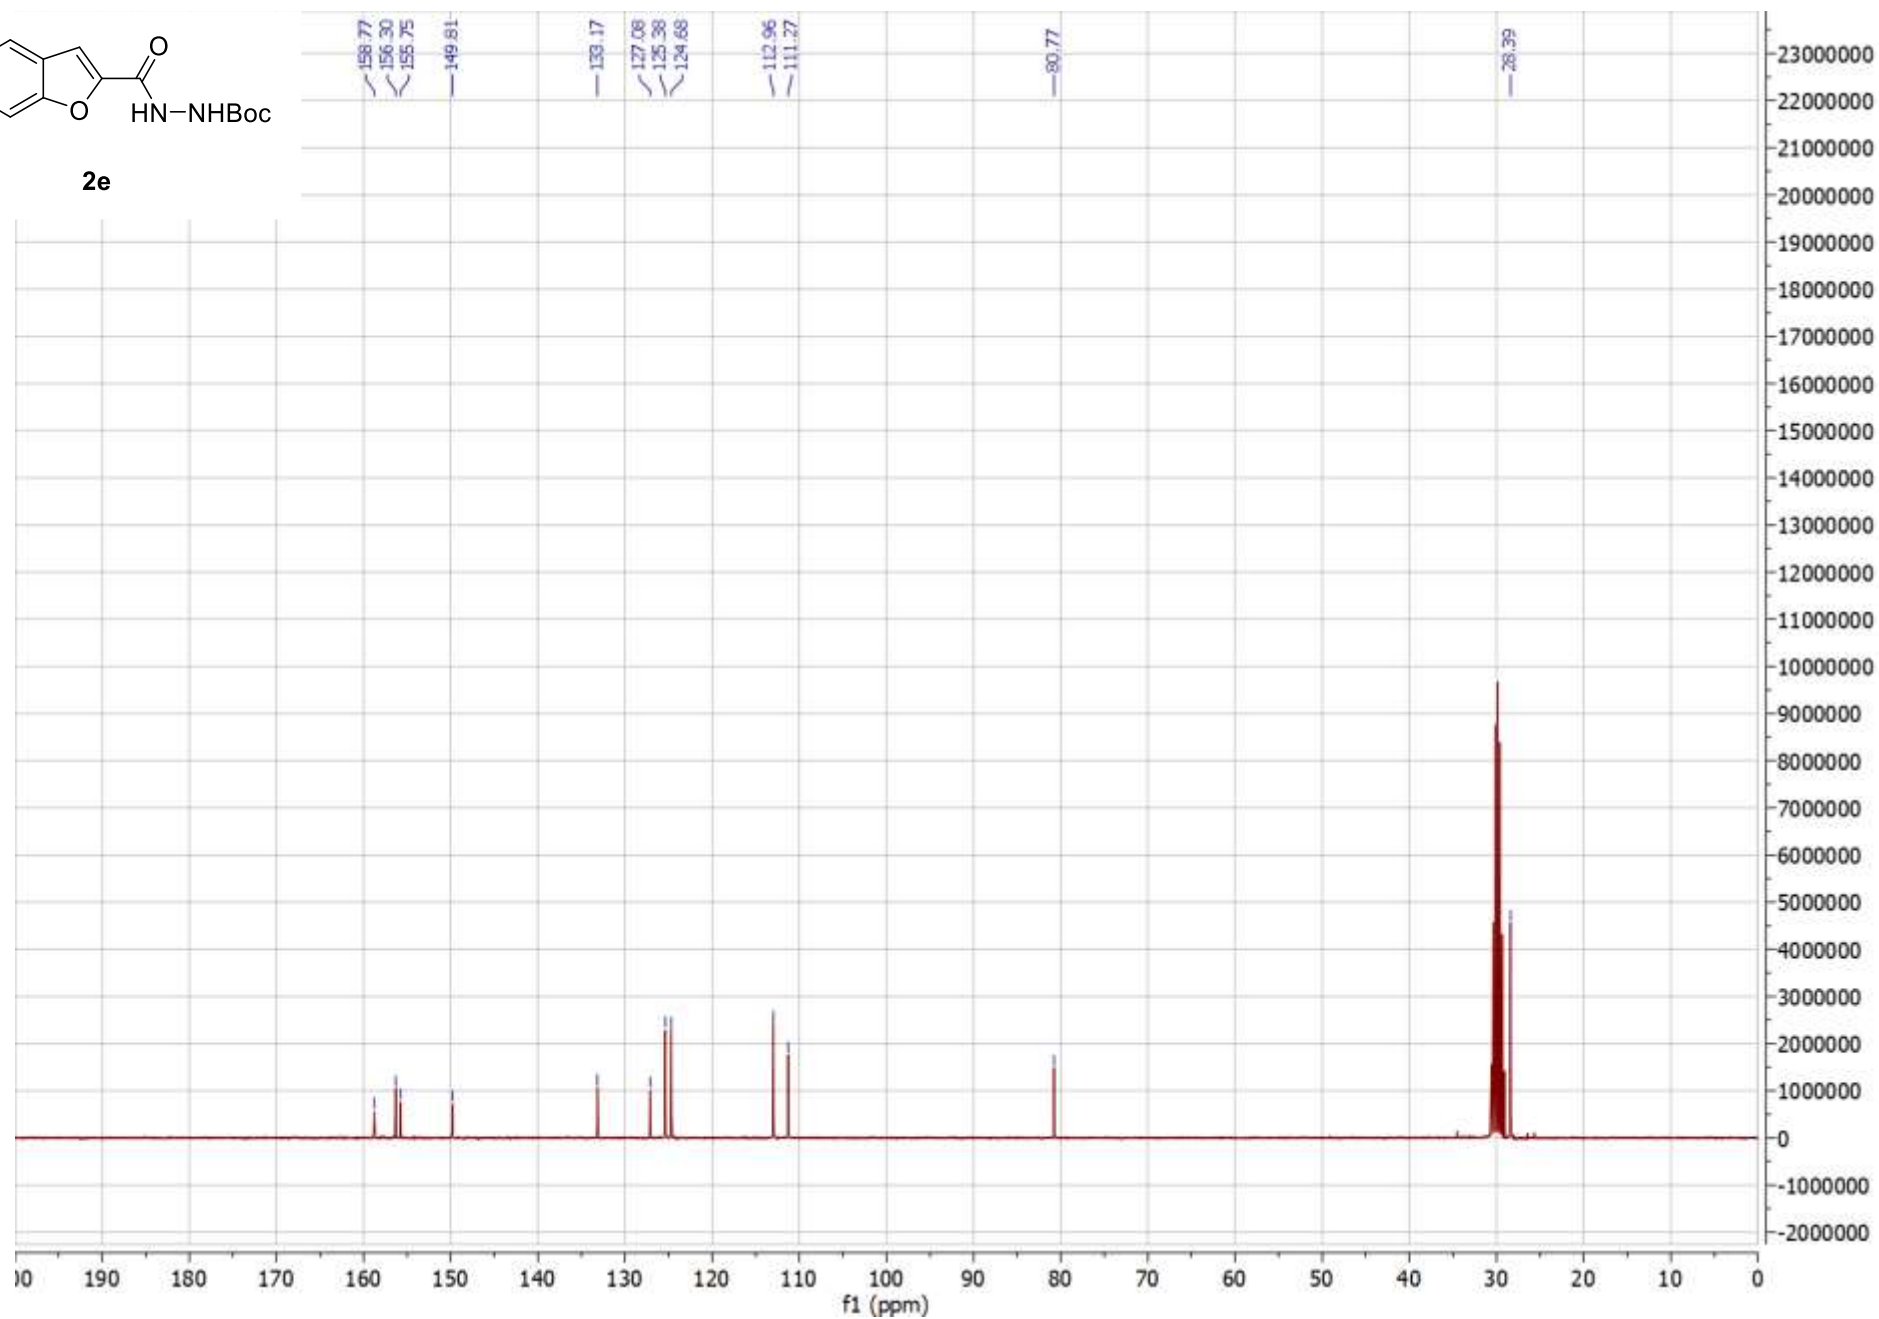

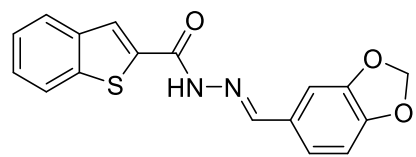

**1.a**

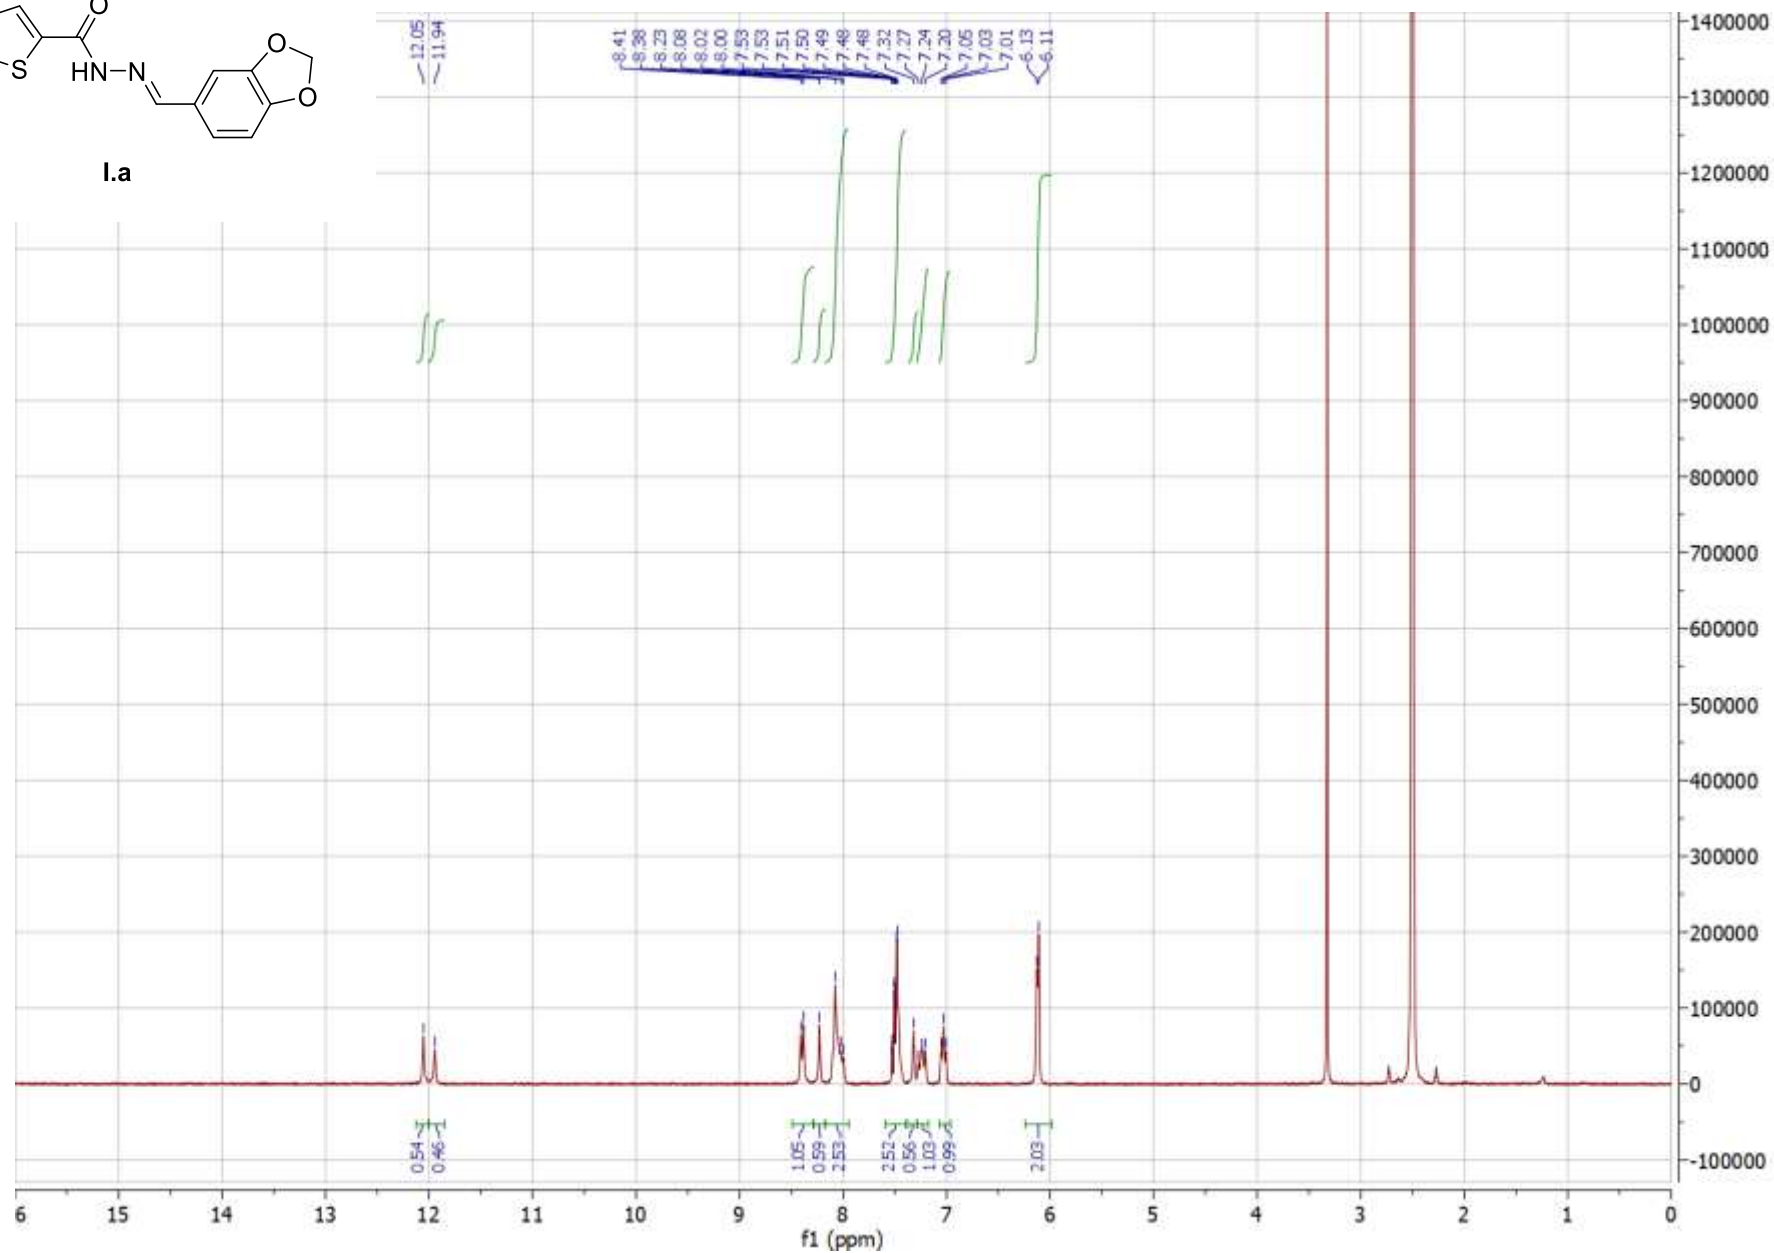

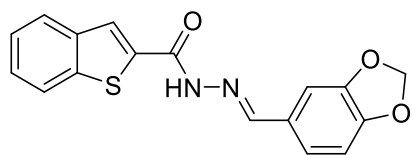

**1.a**

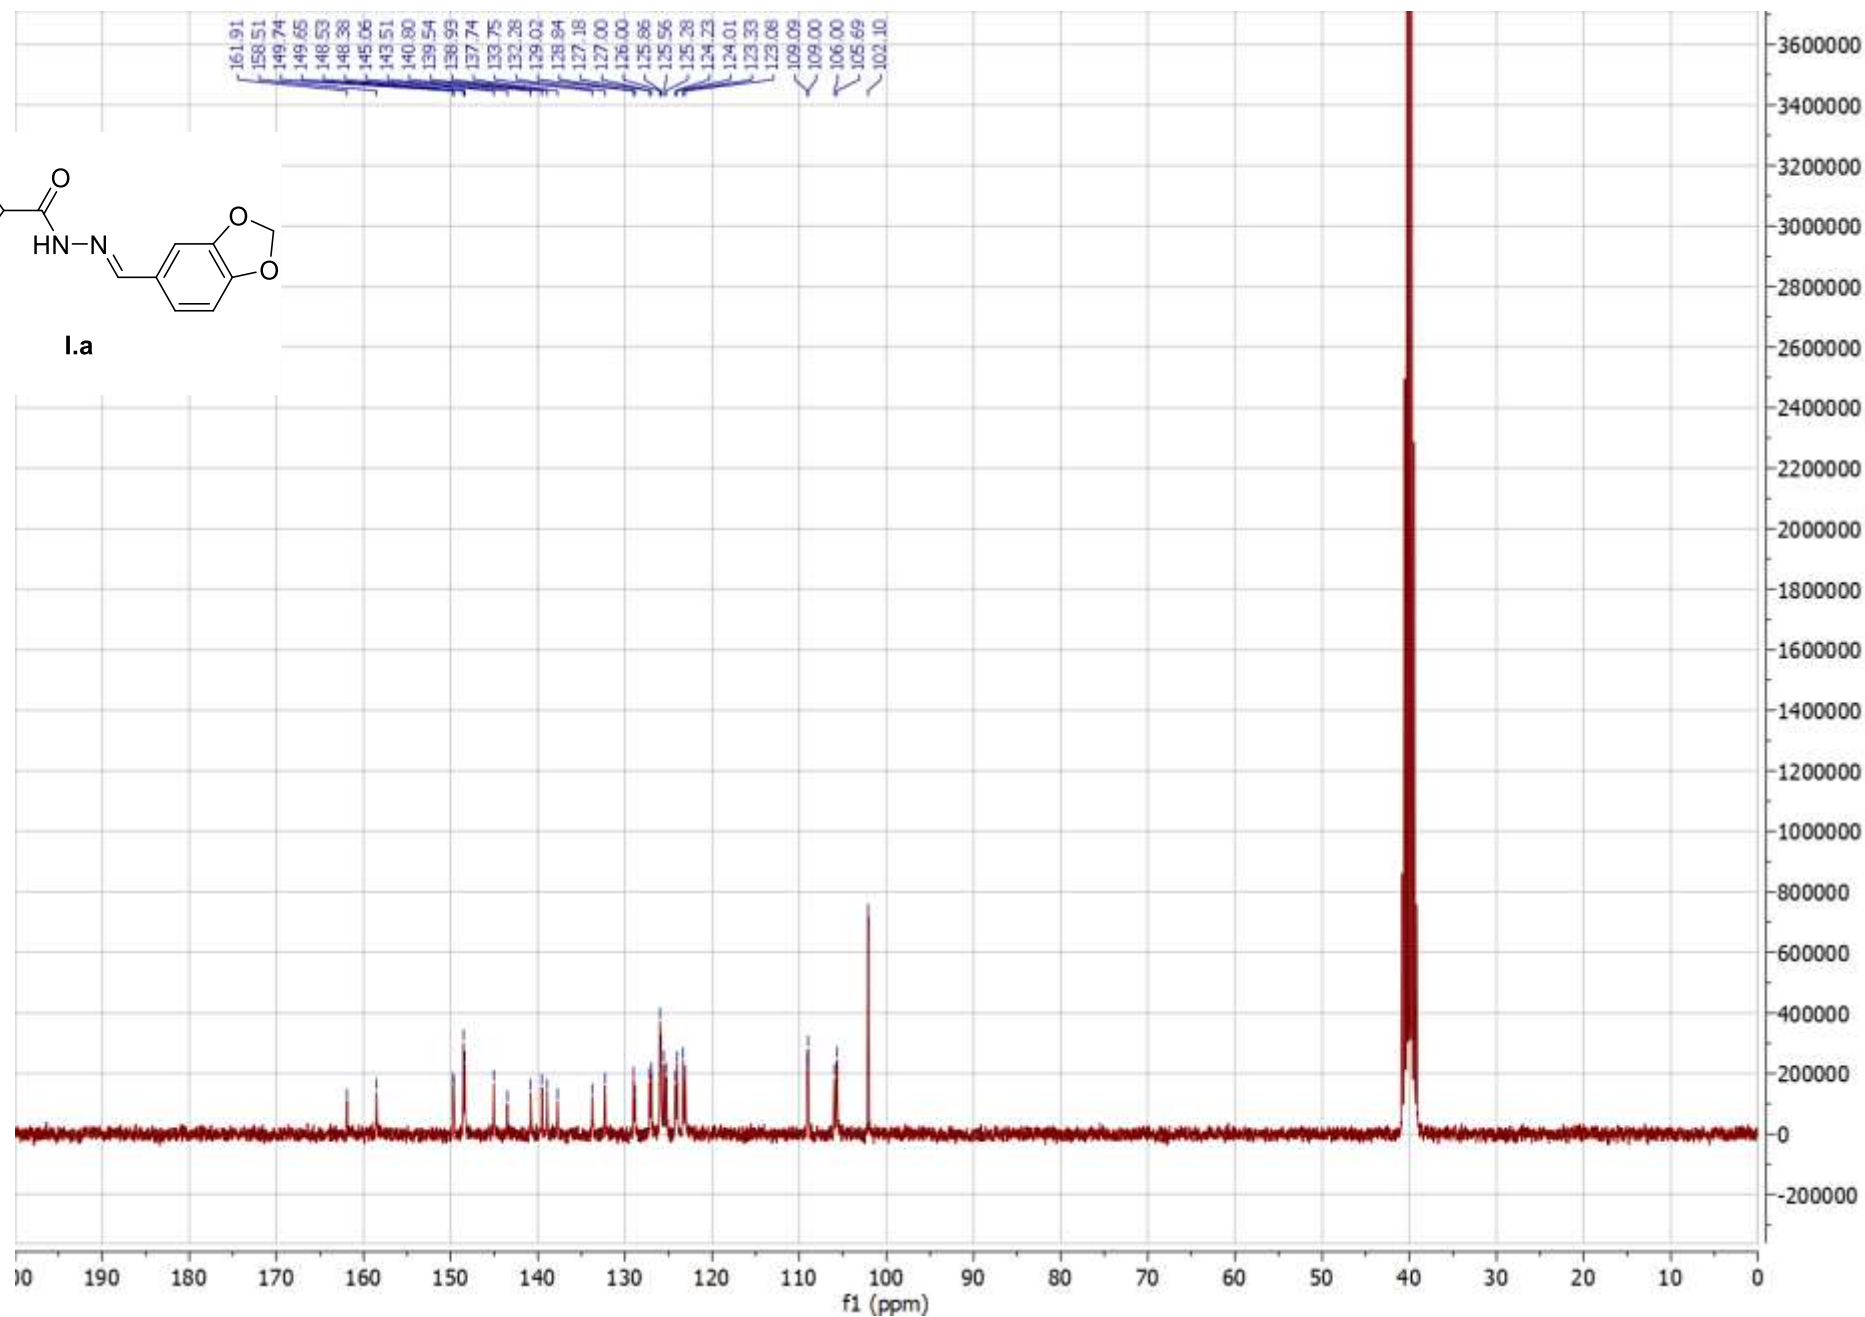

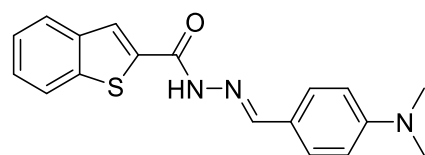

**1.b**

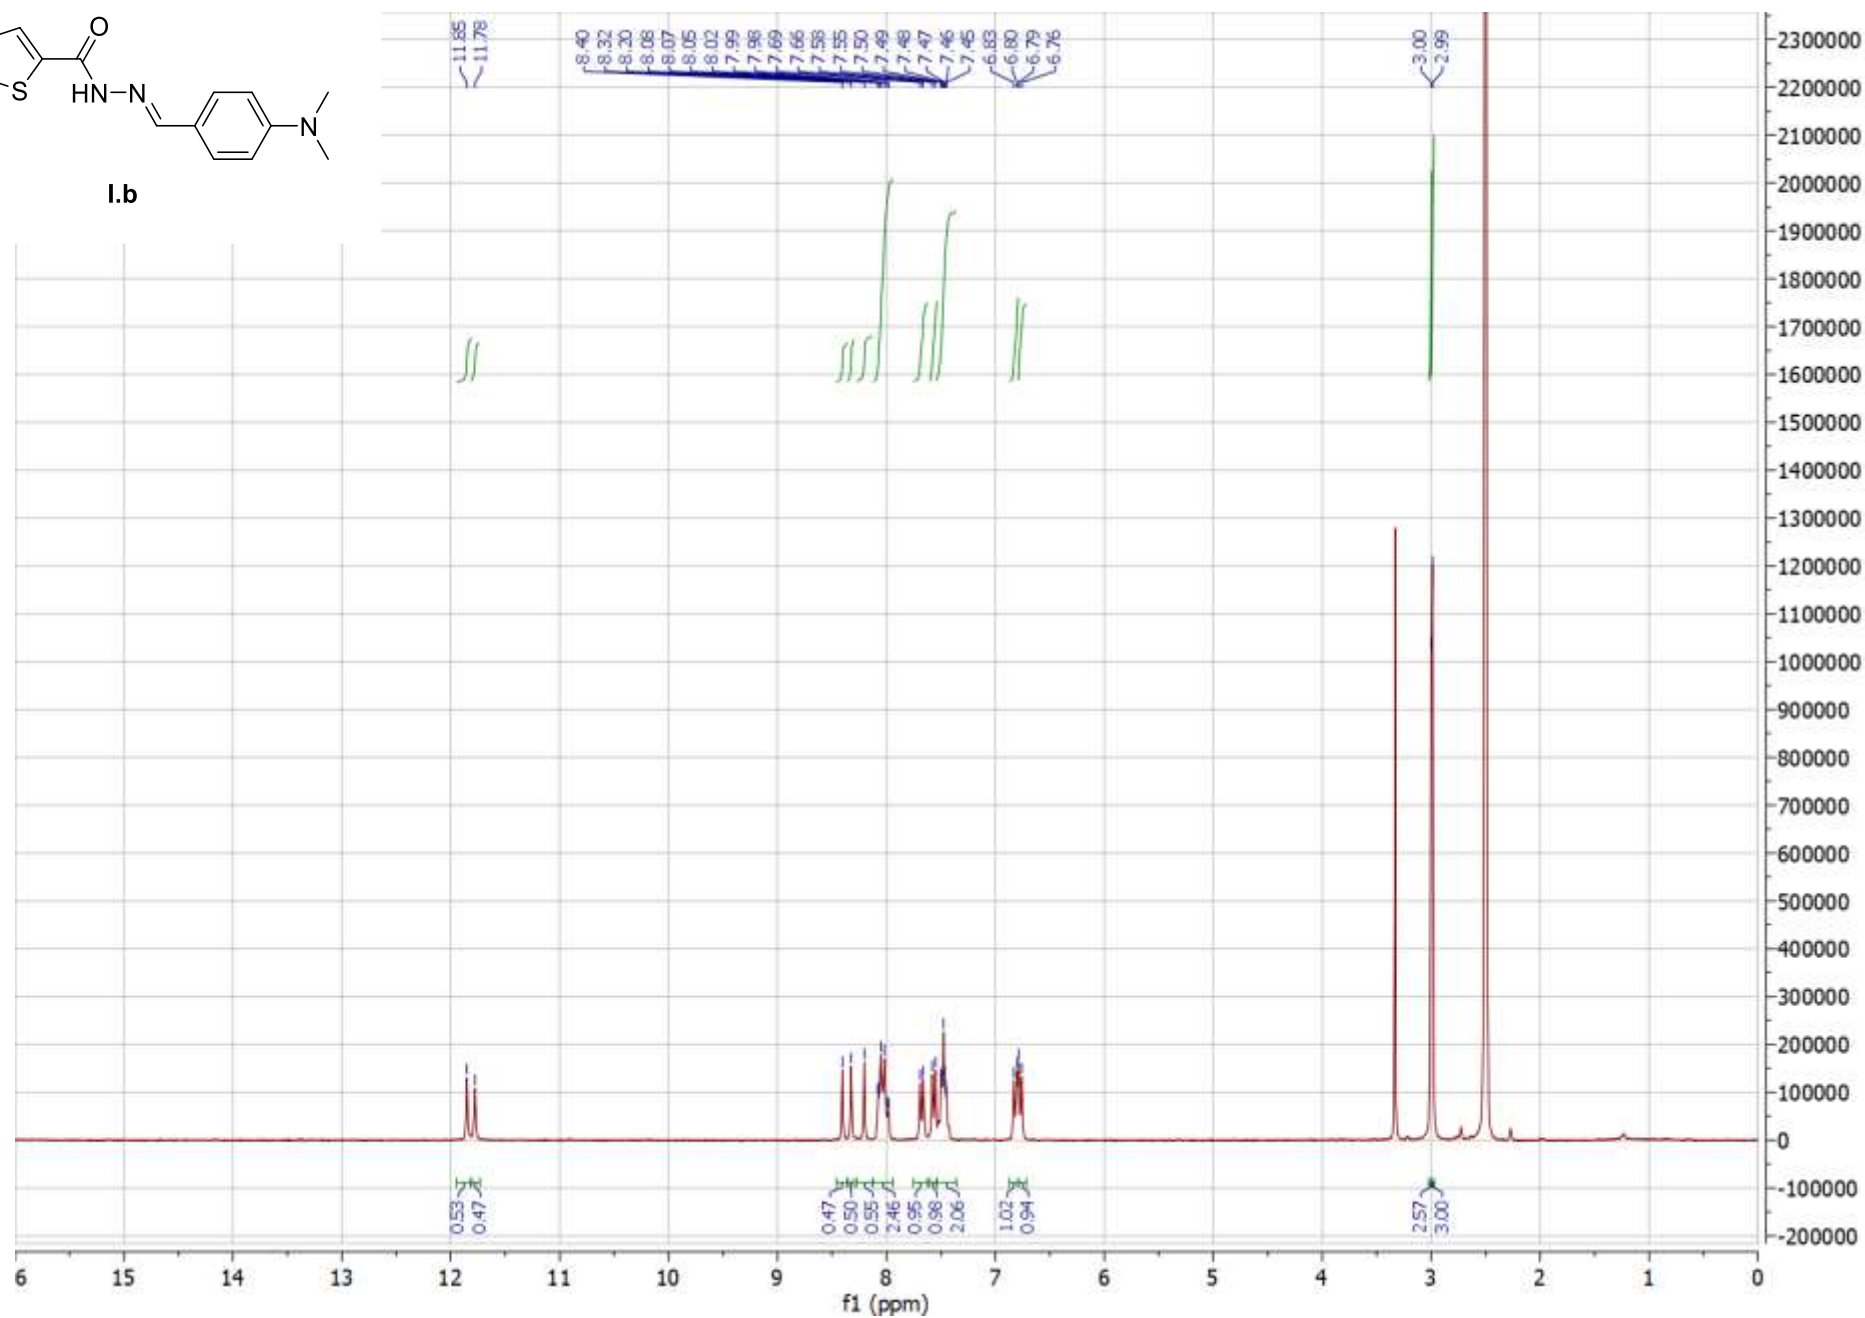



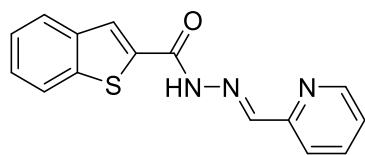

**1.c**

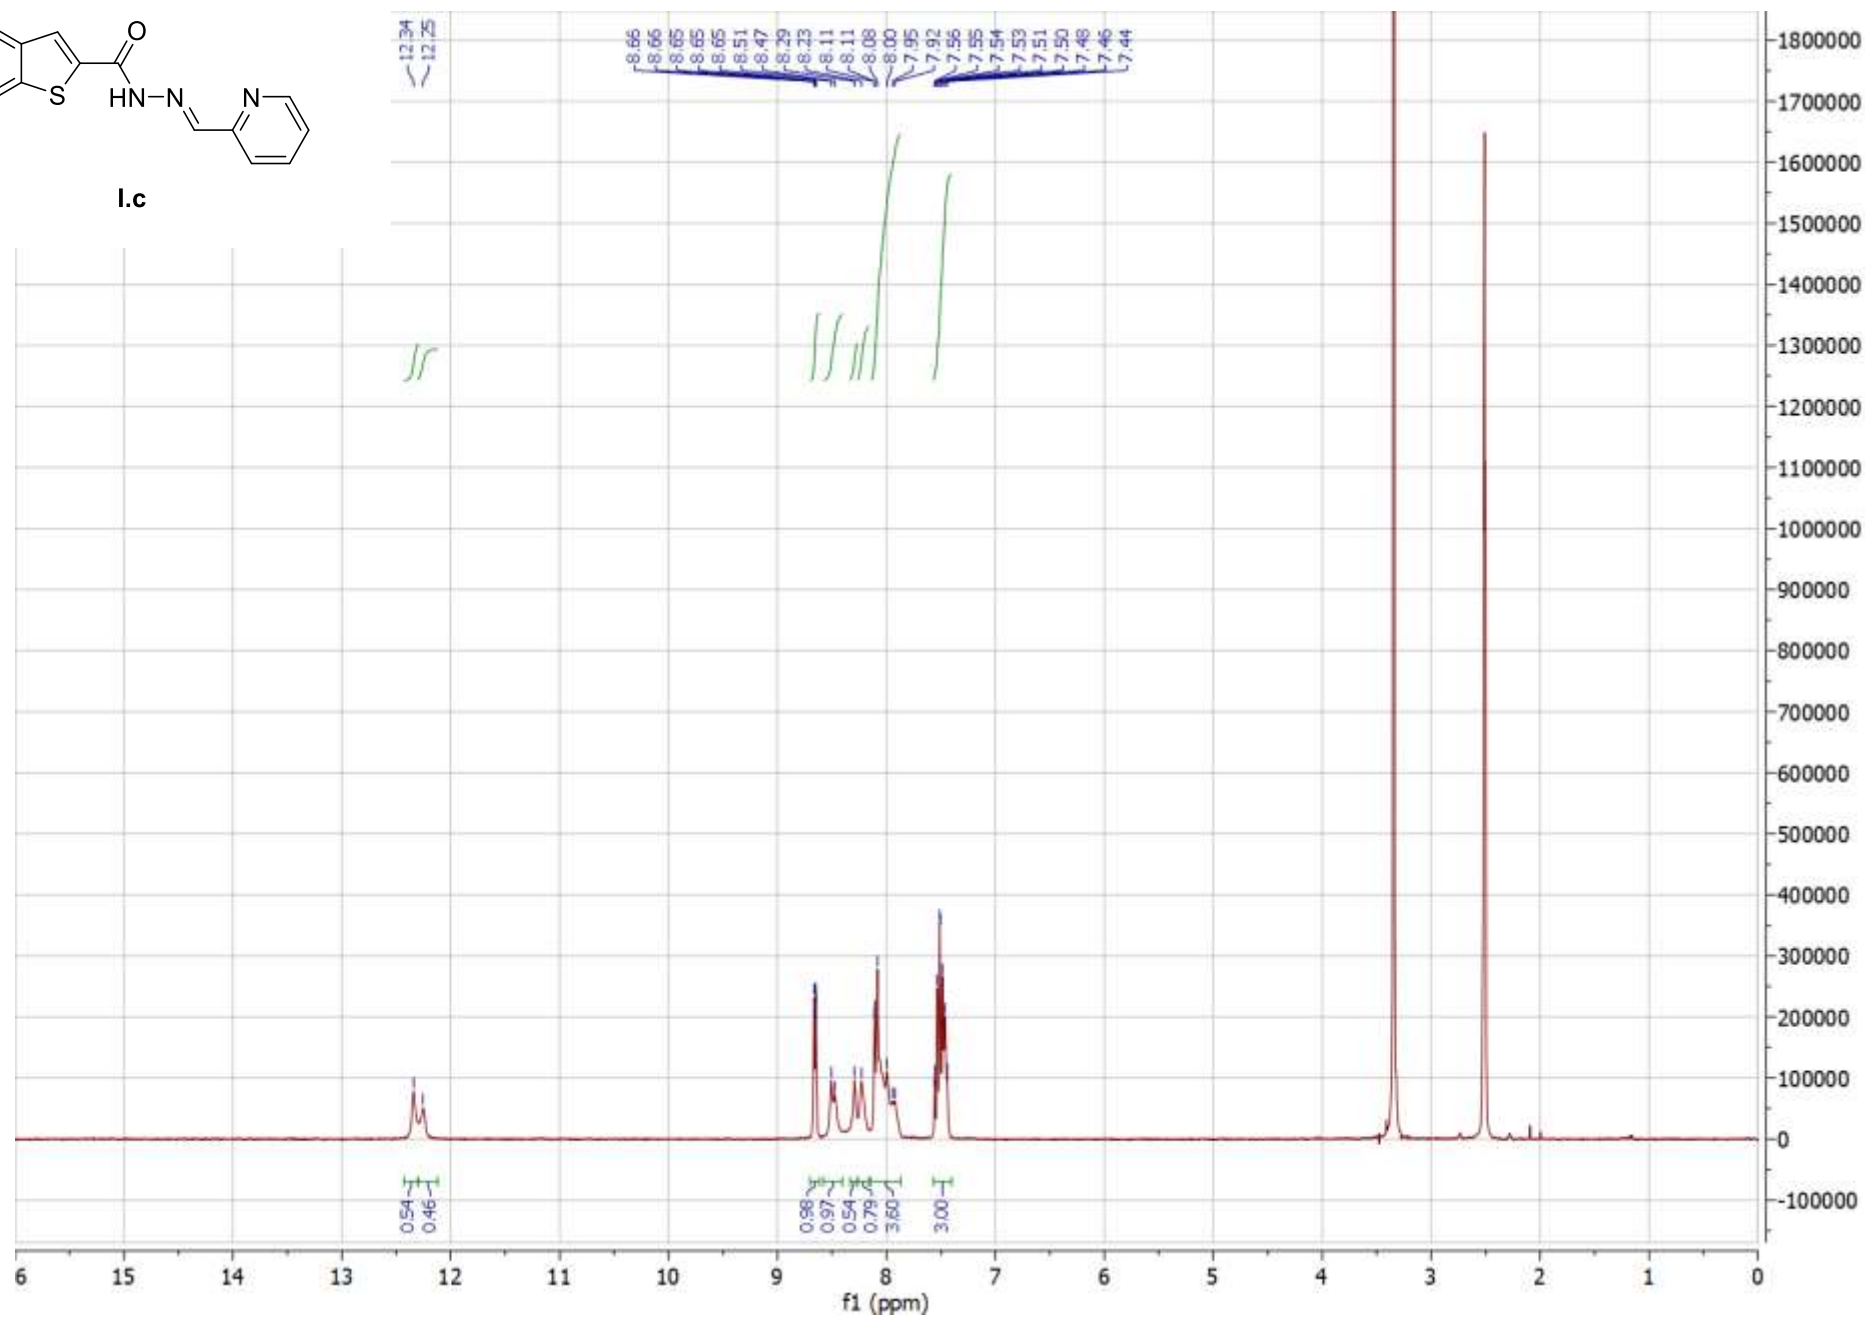

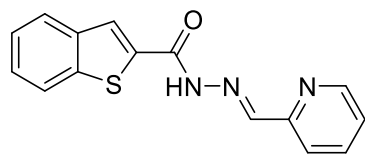

**1.c**

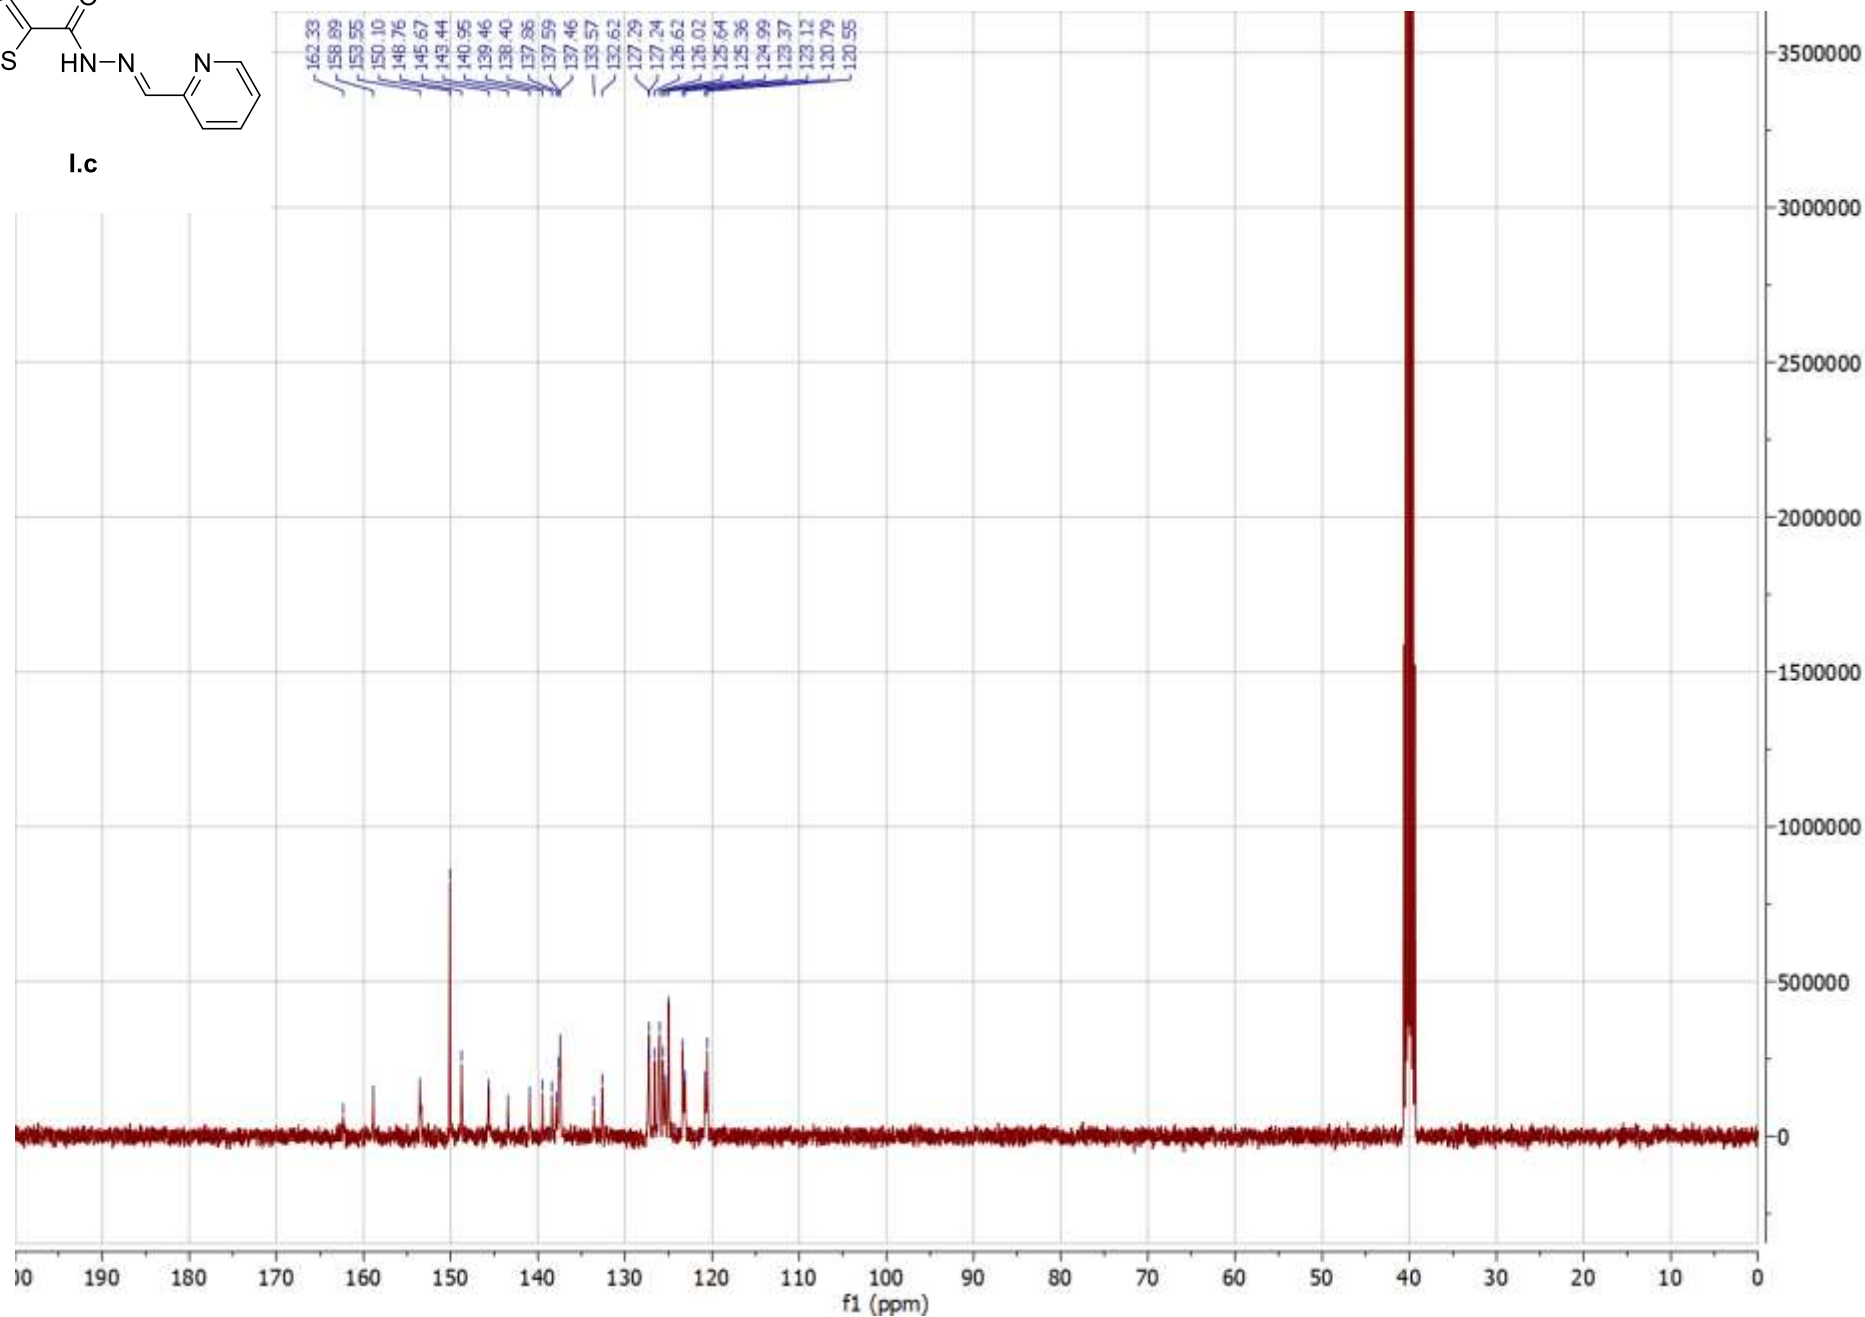

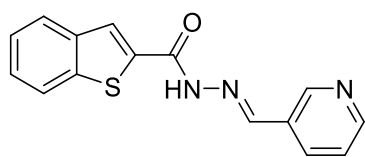

**I.d**

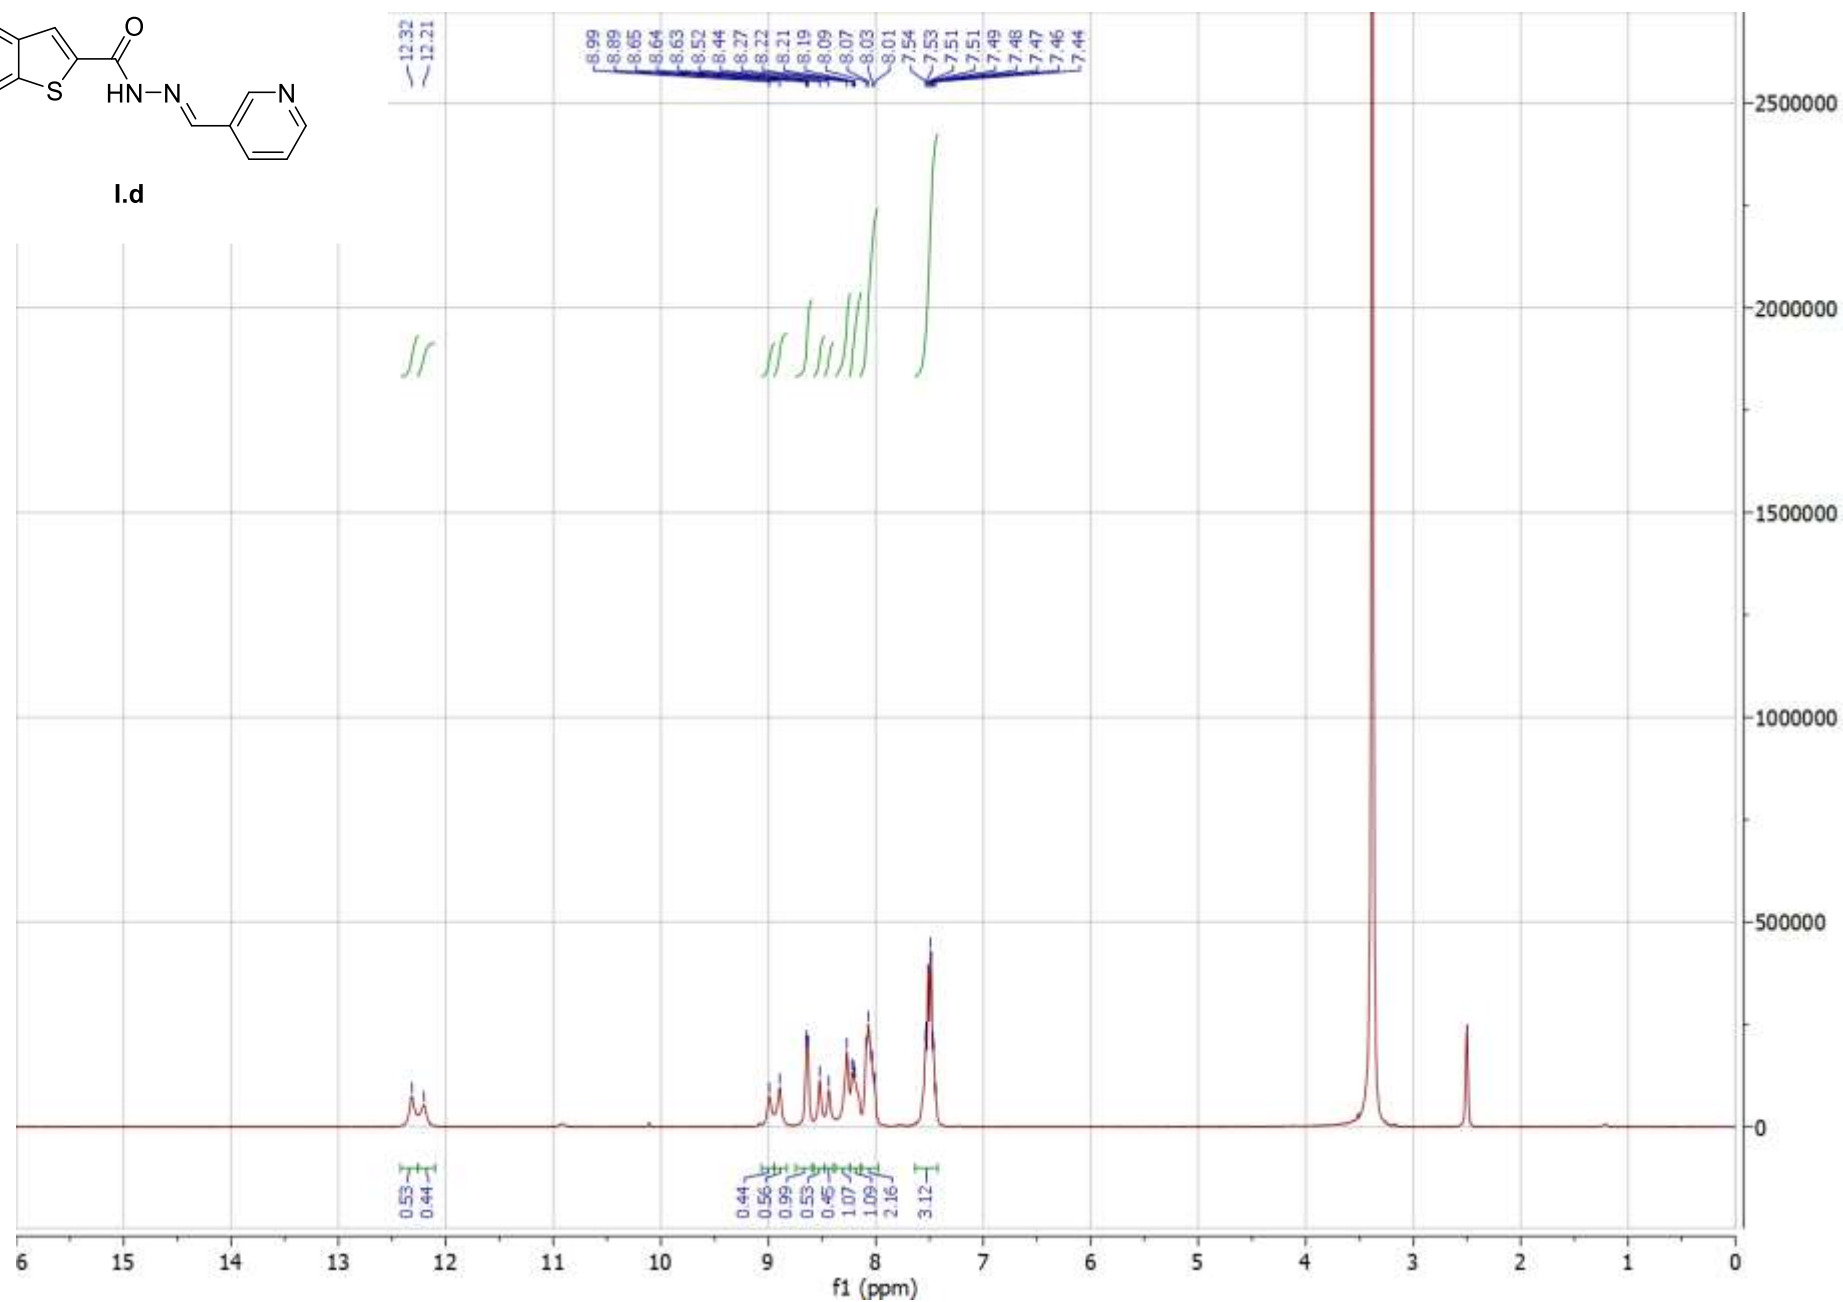

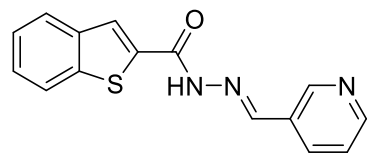

I.d

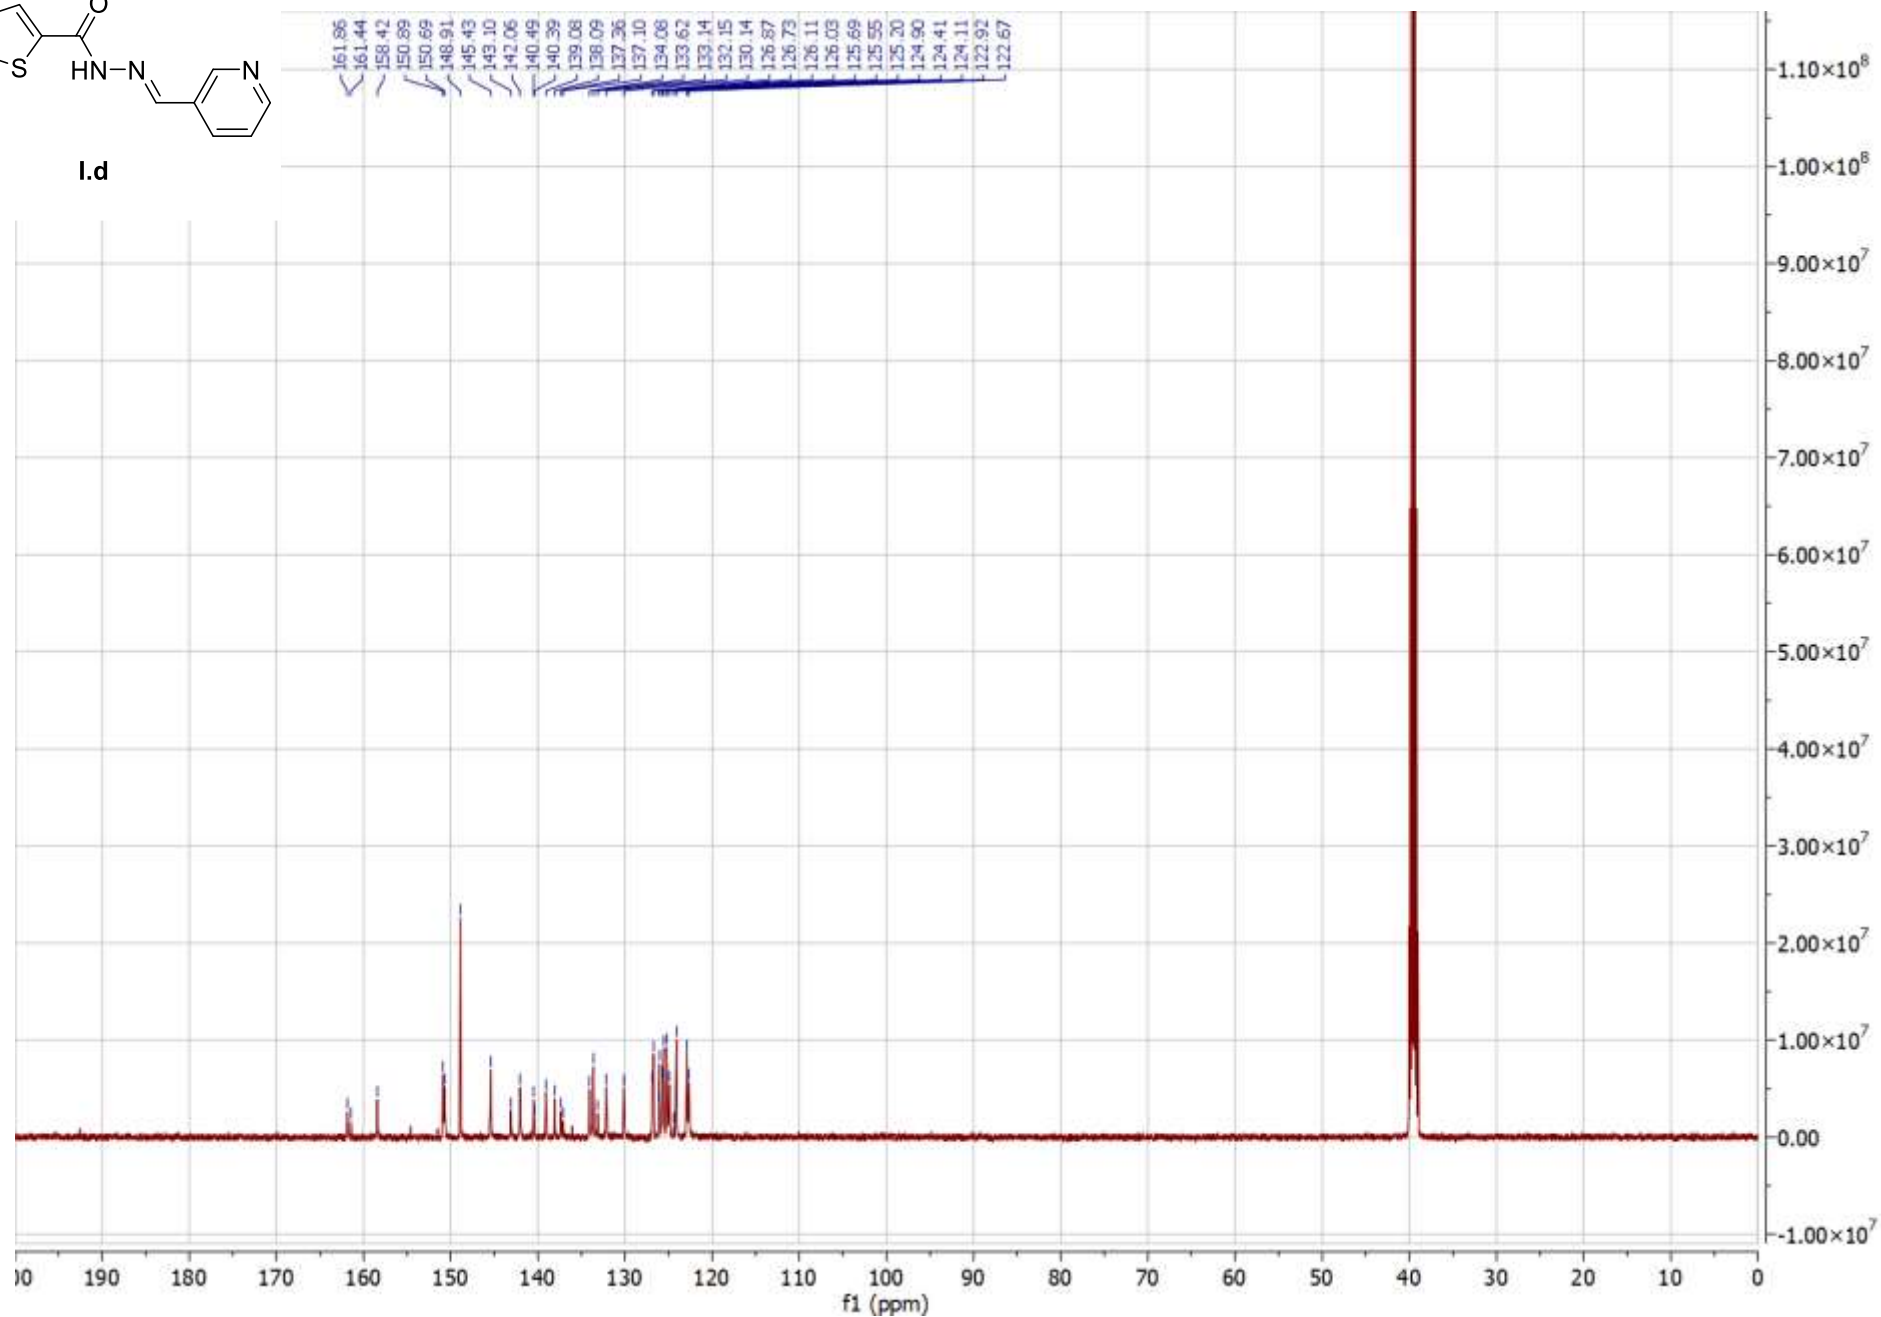

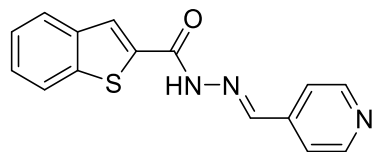

1.e

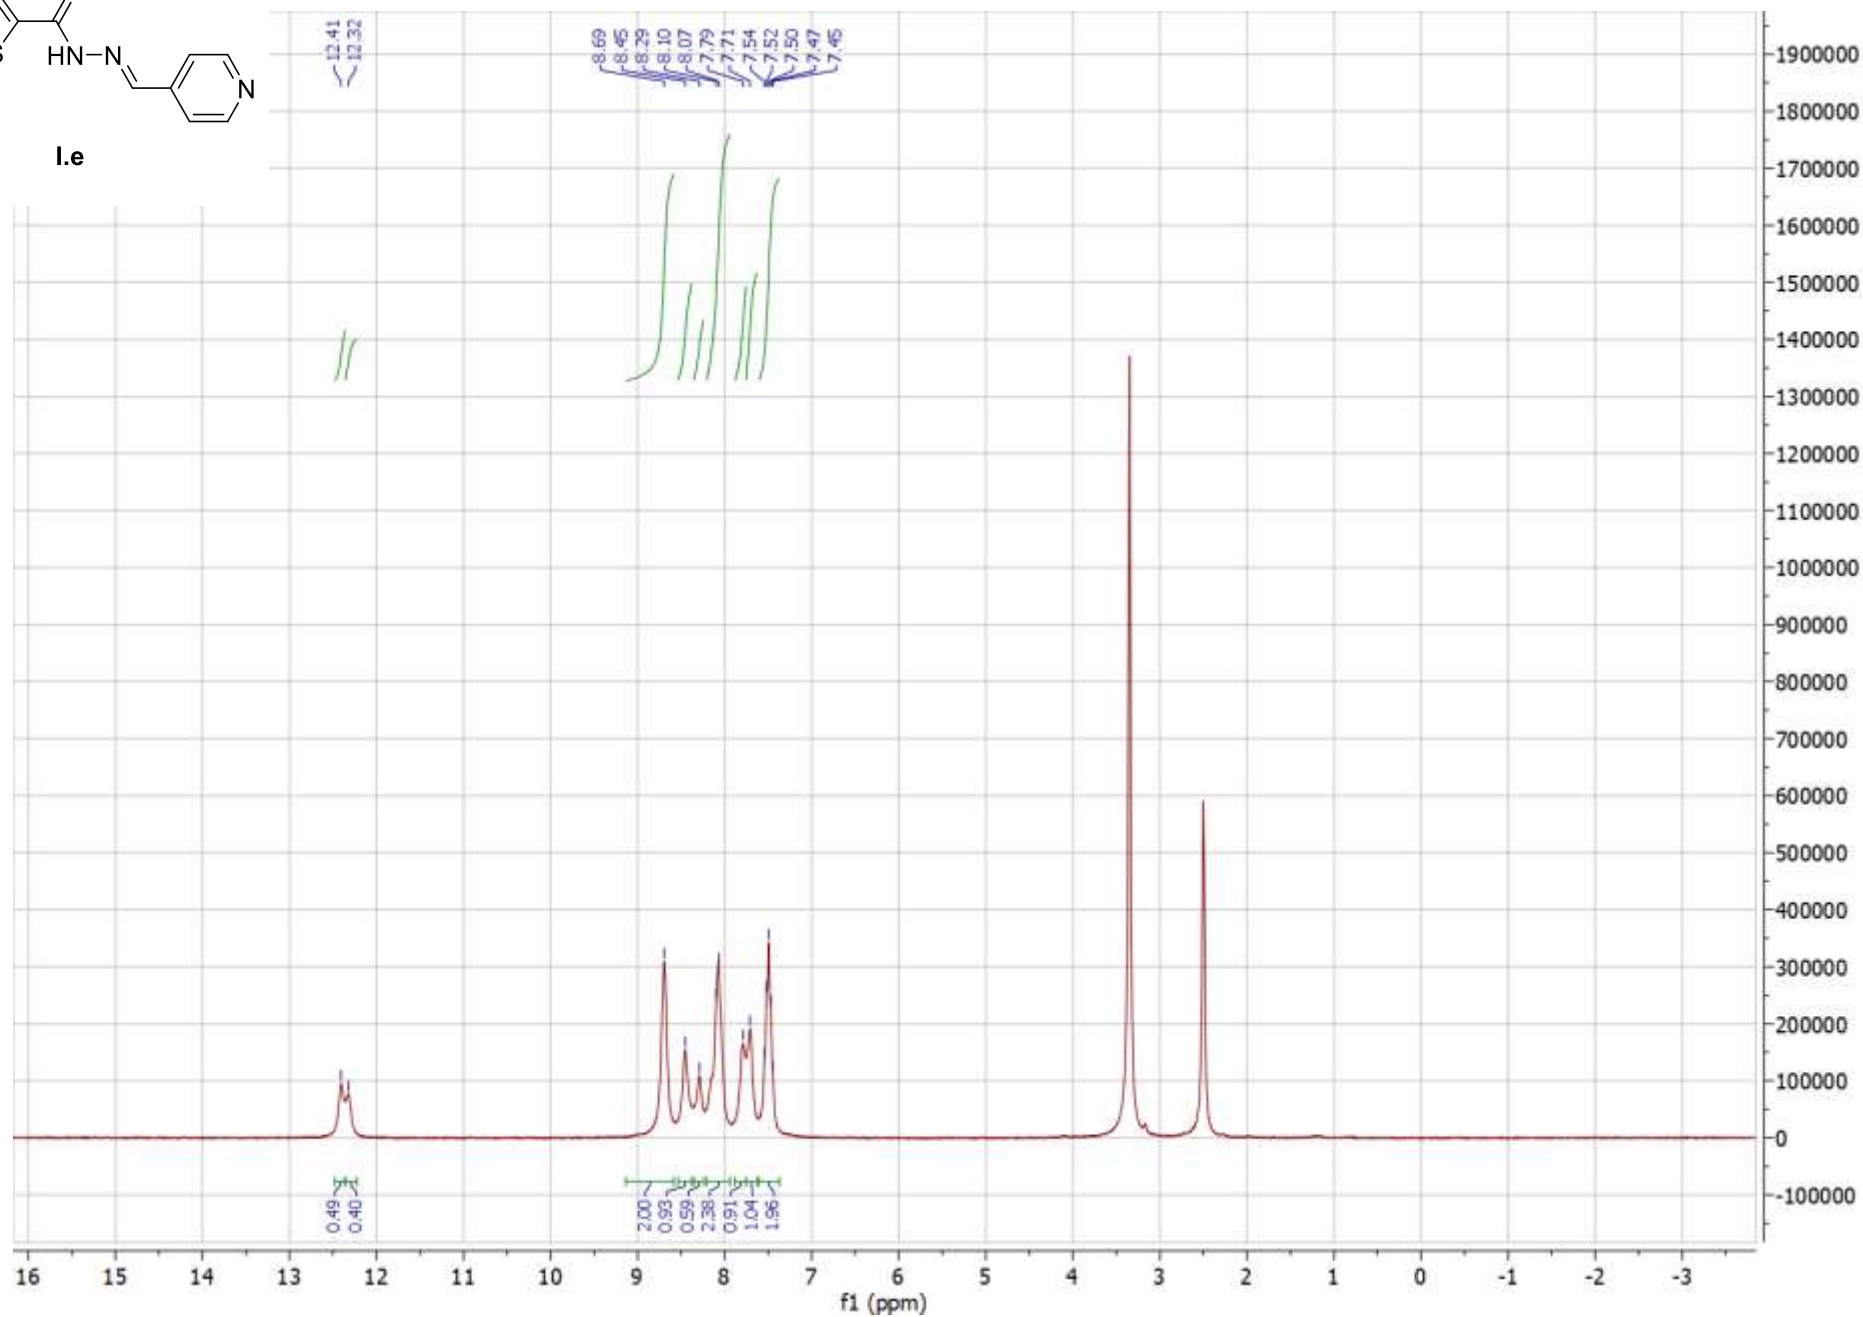

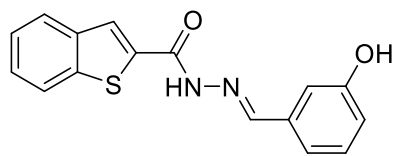

I.f

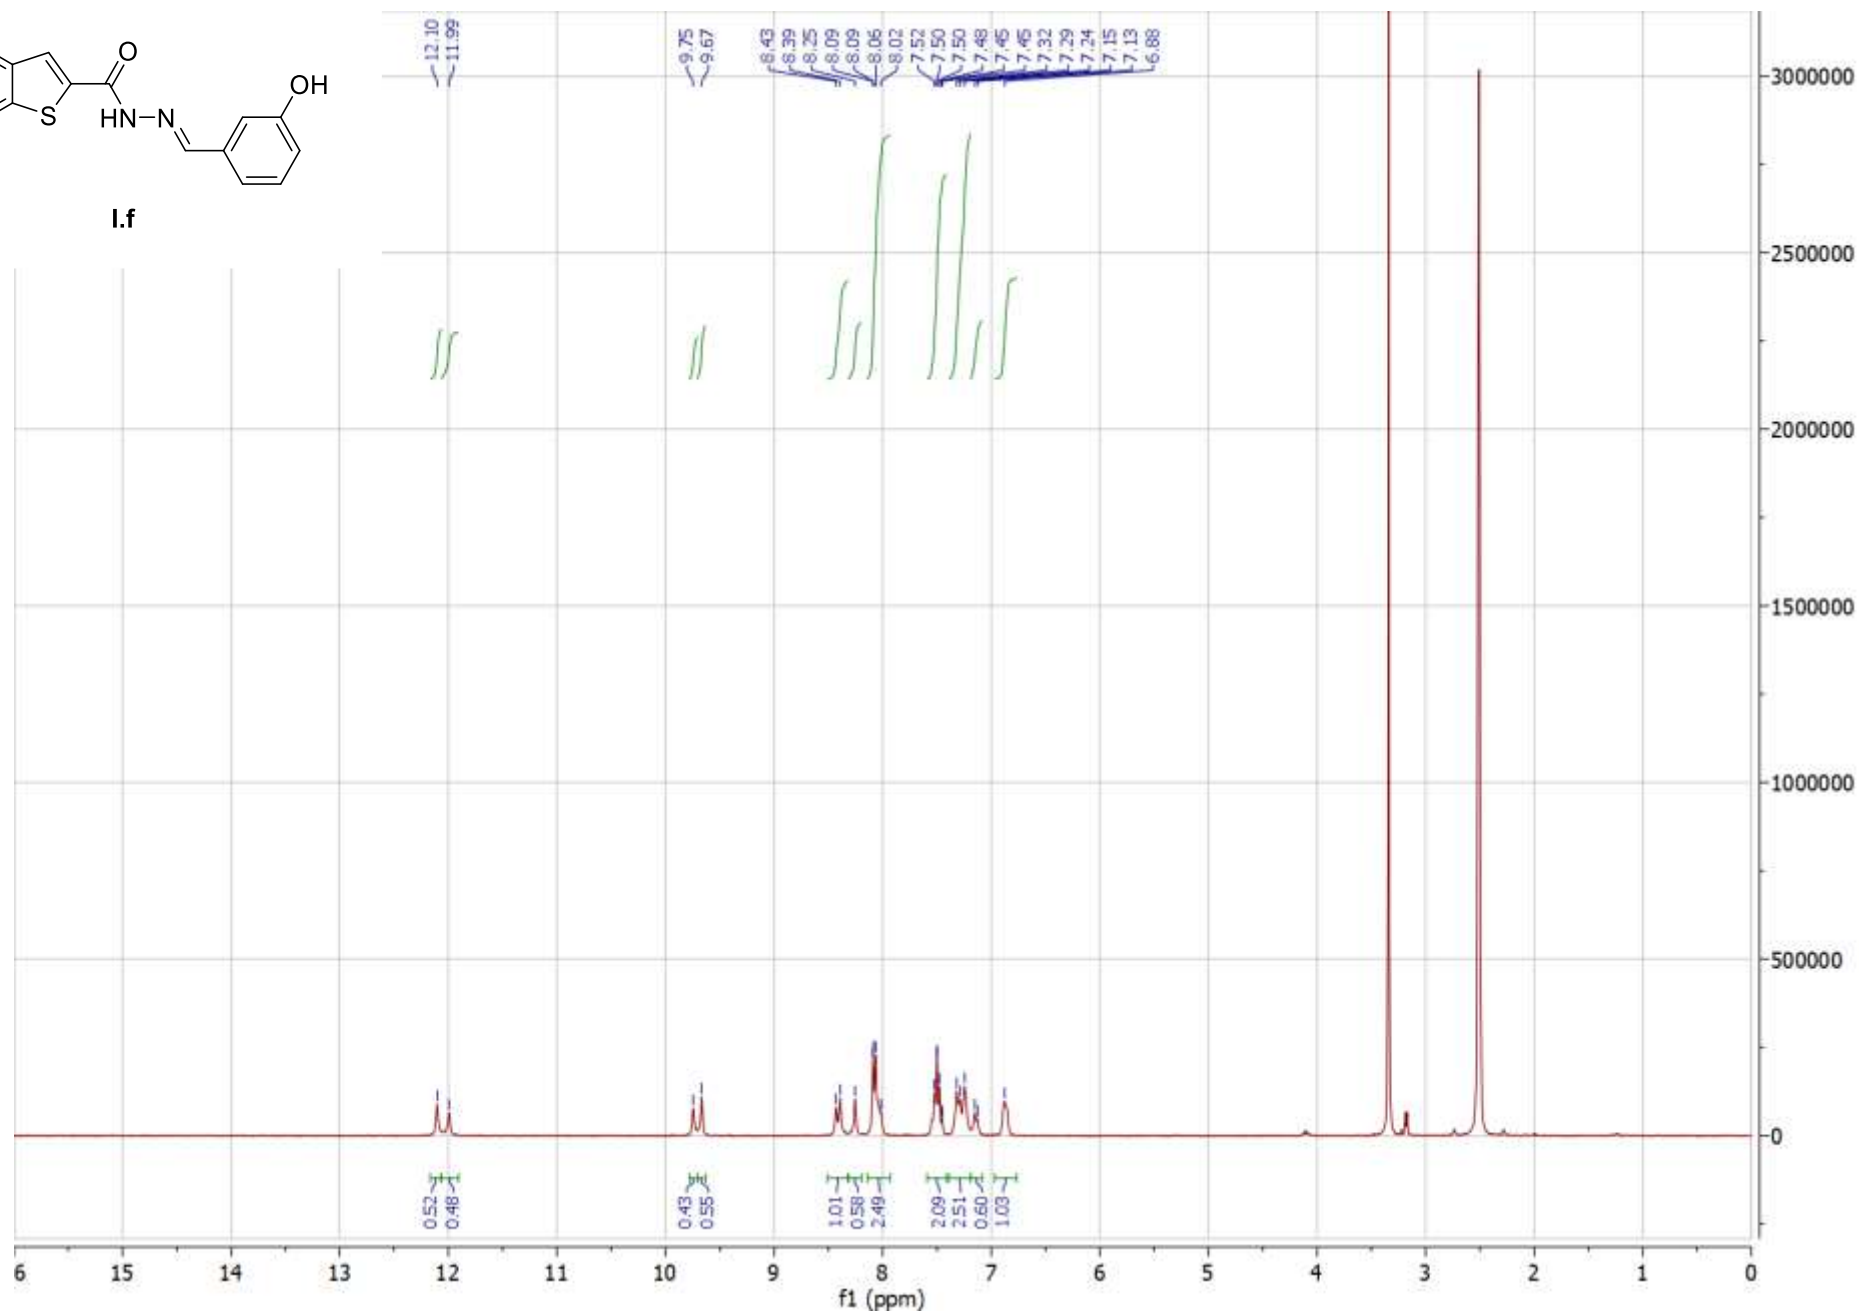

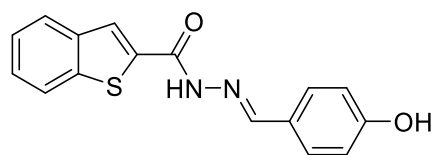

I.g

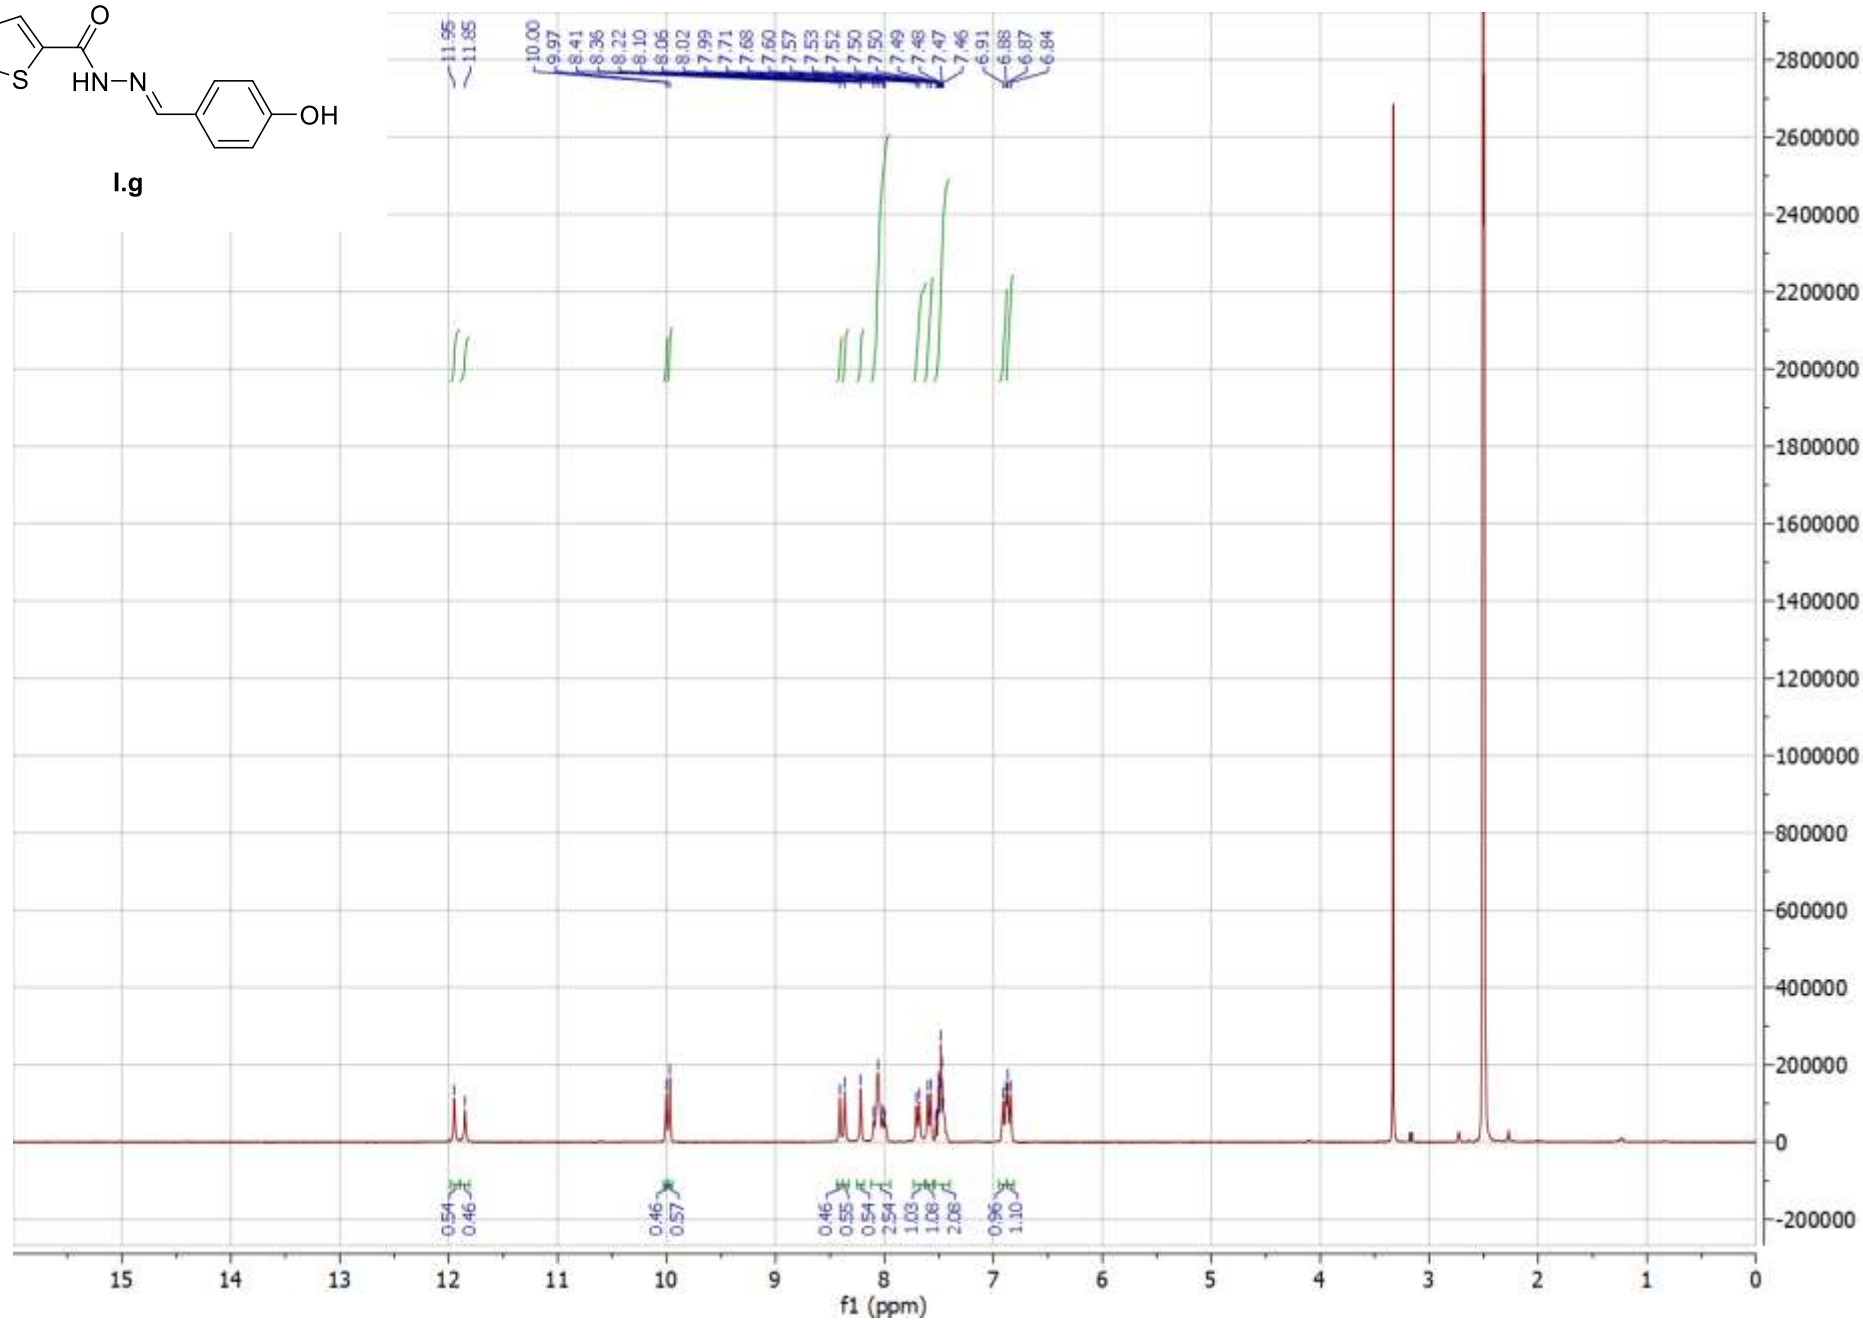

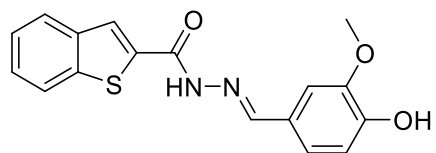

l.h

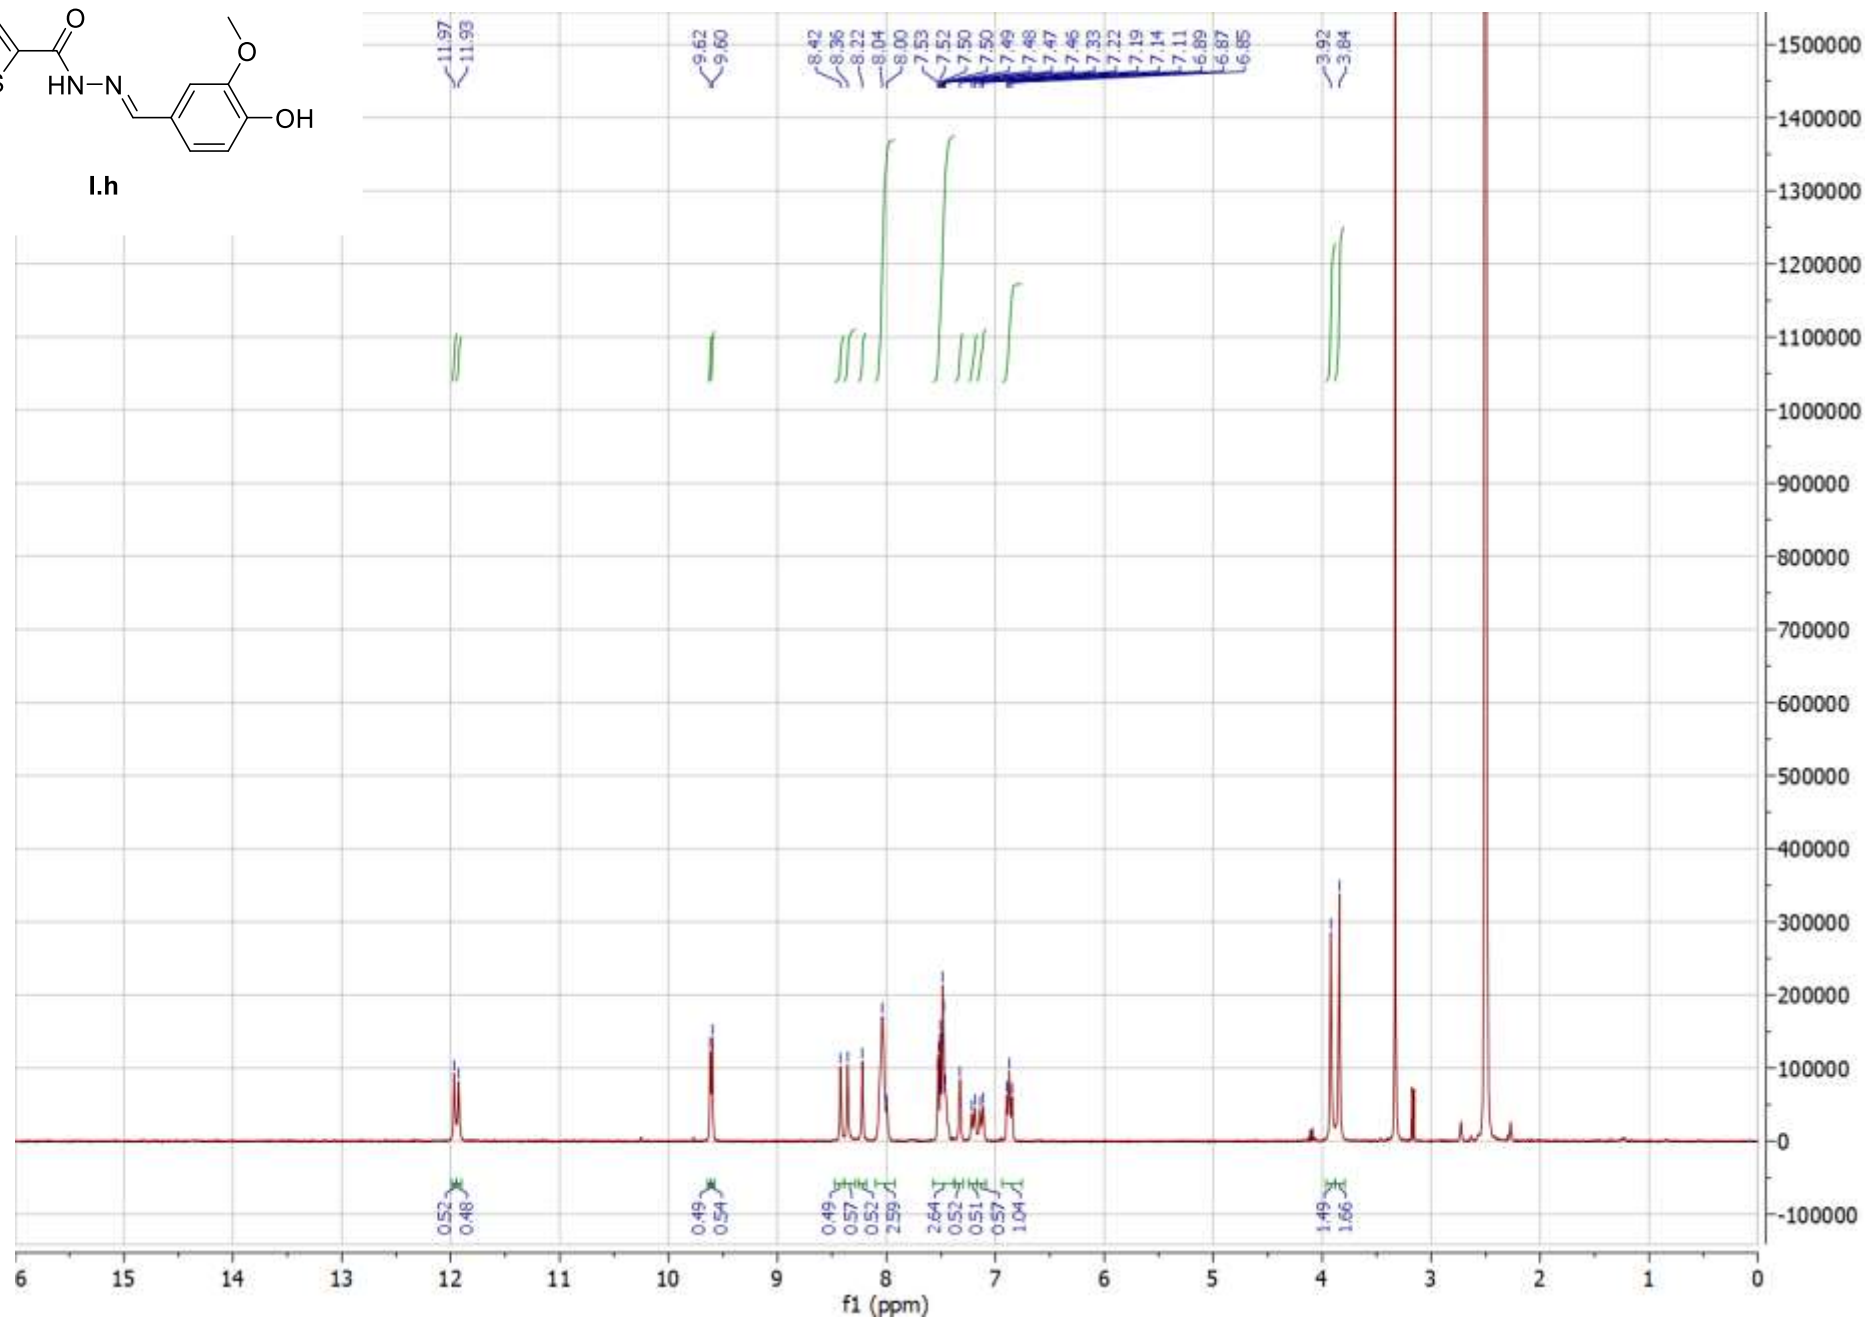



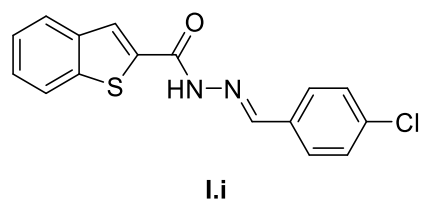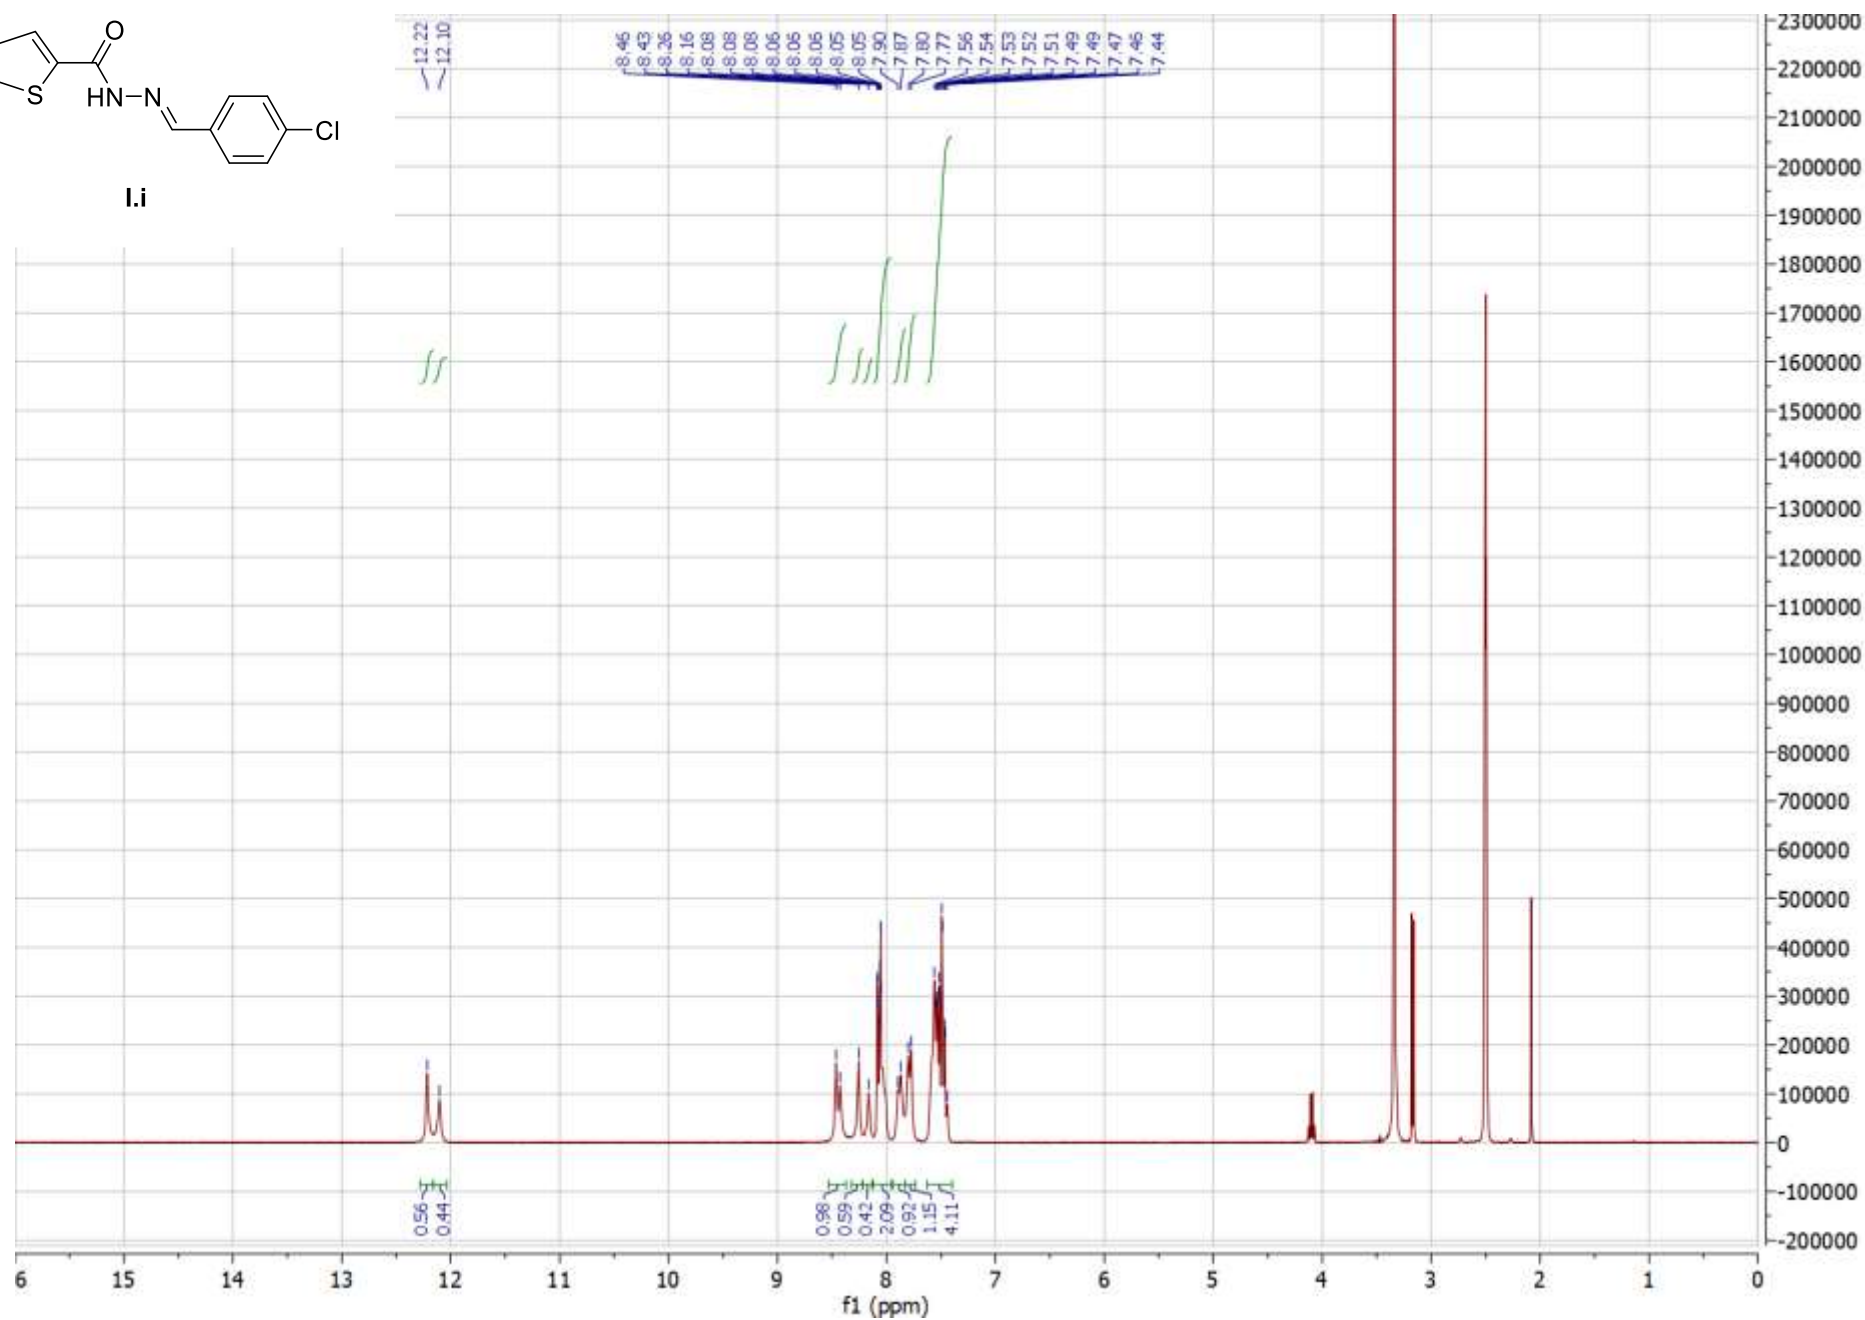

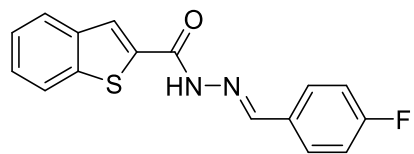

I.j

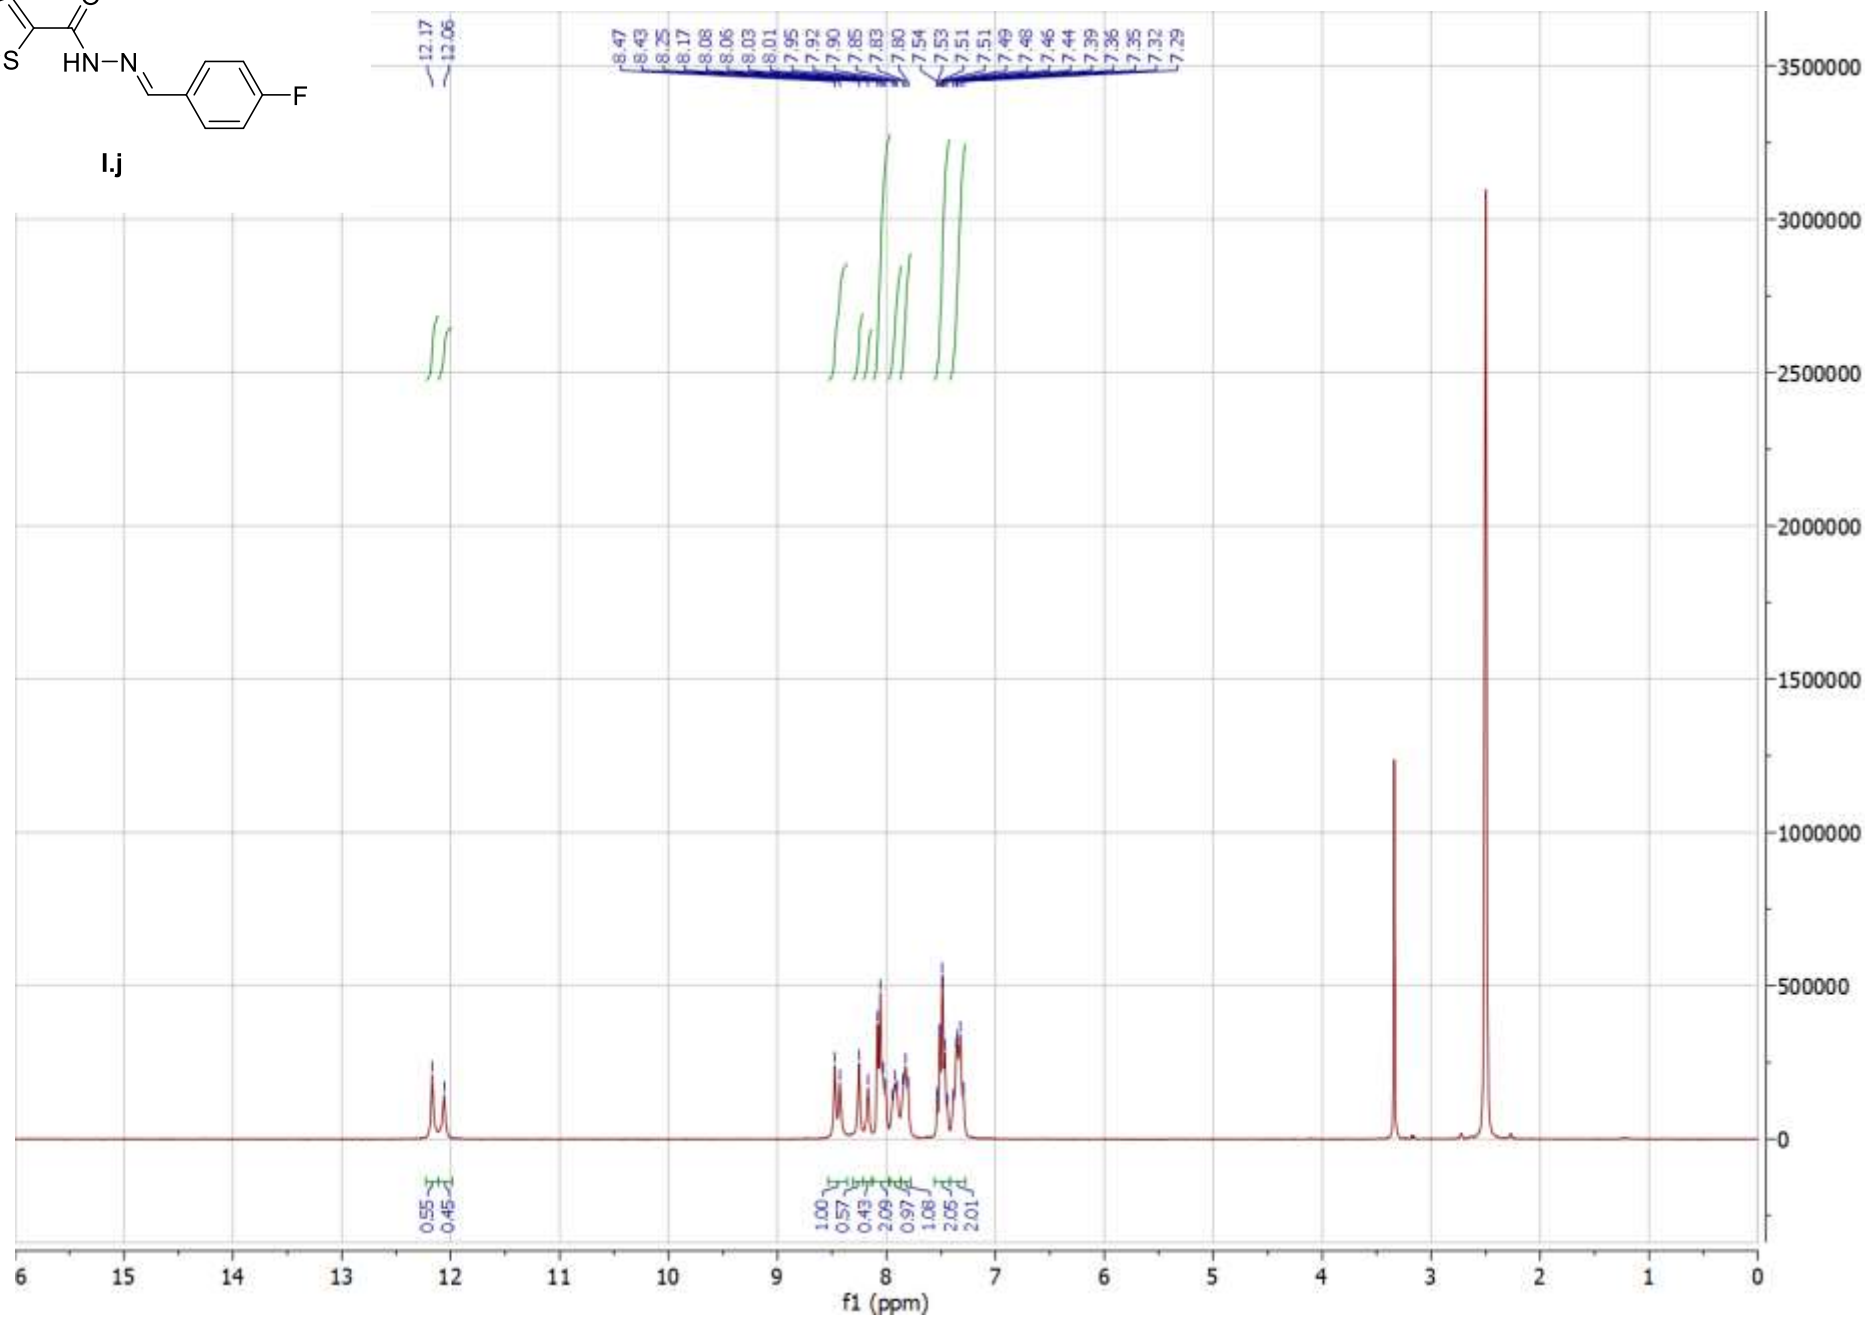

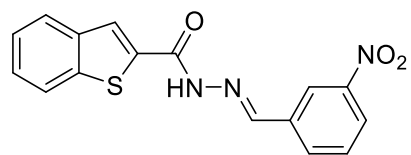

I.k

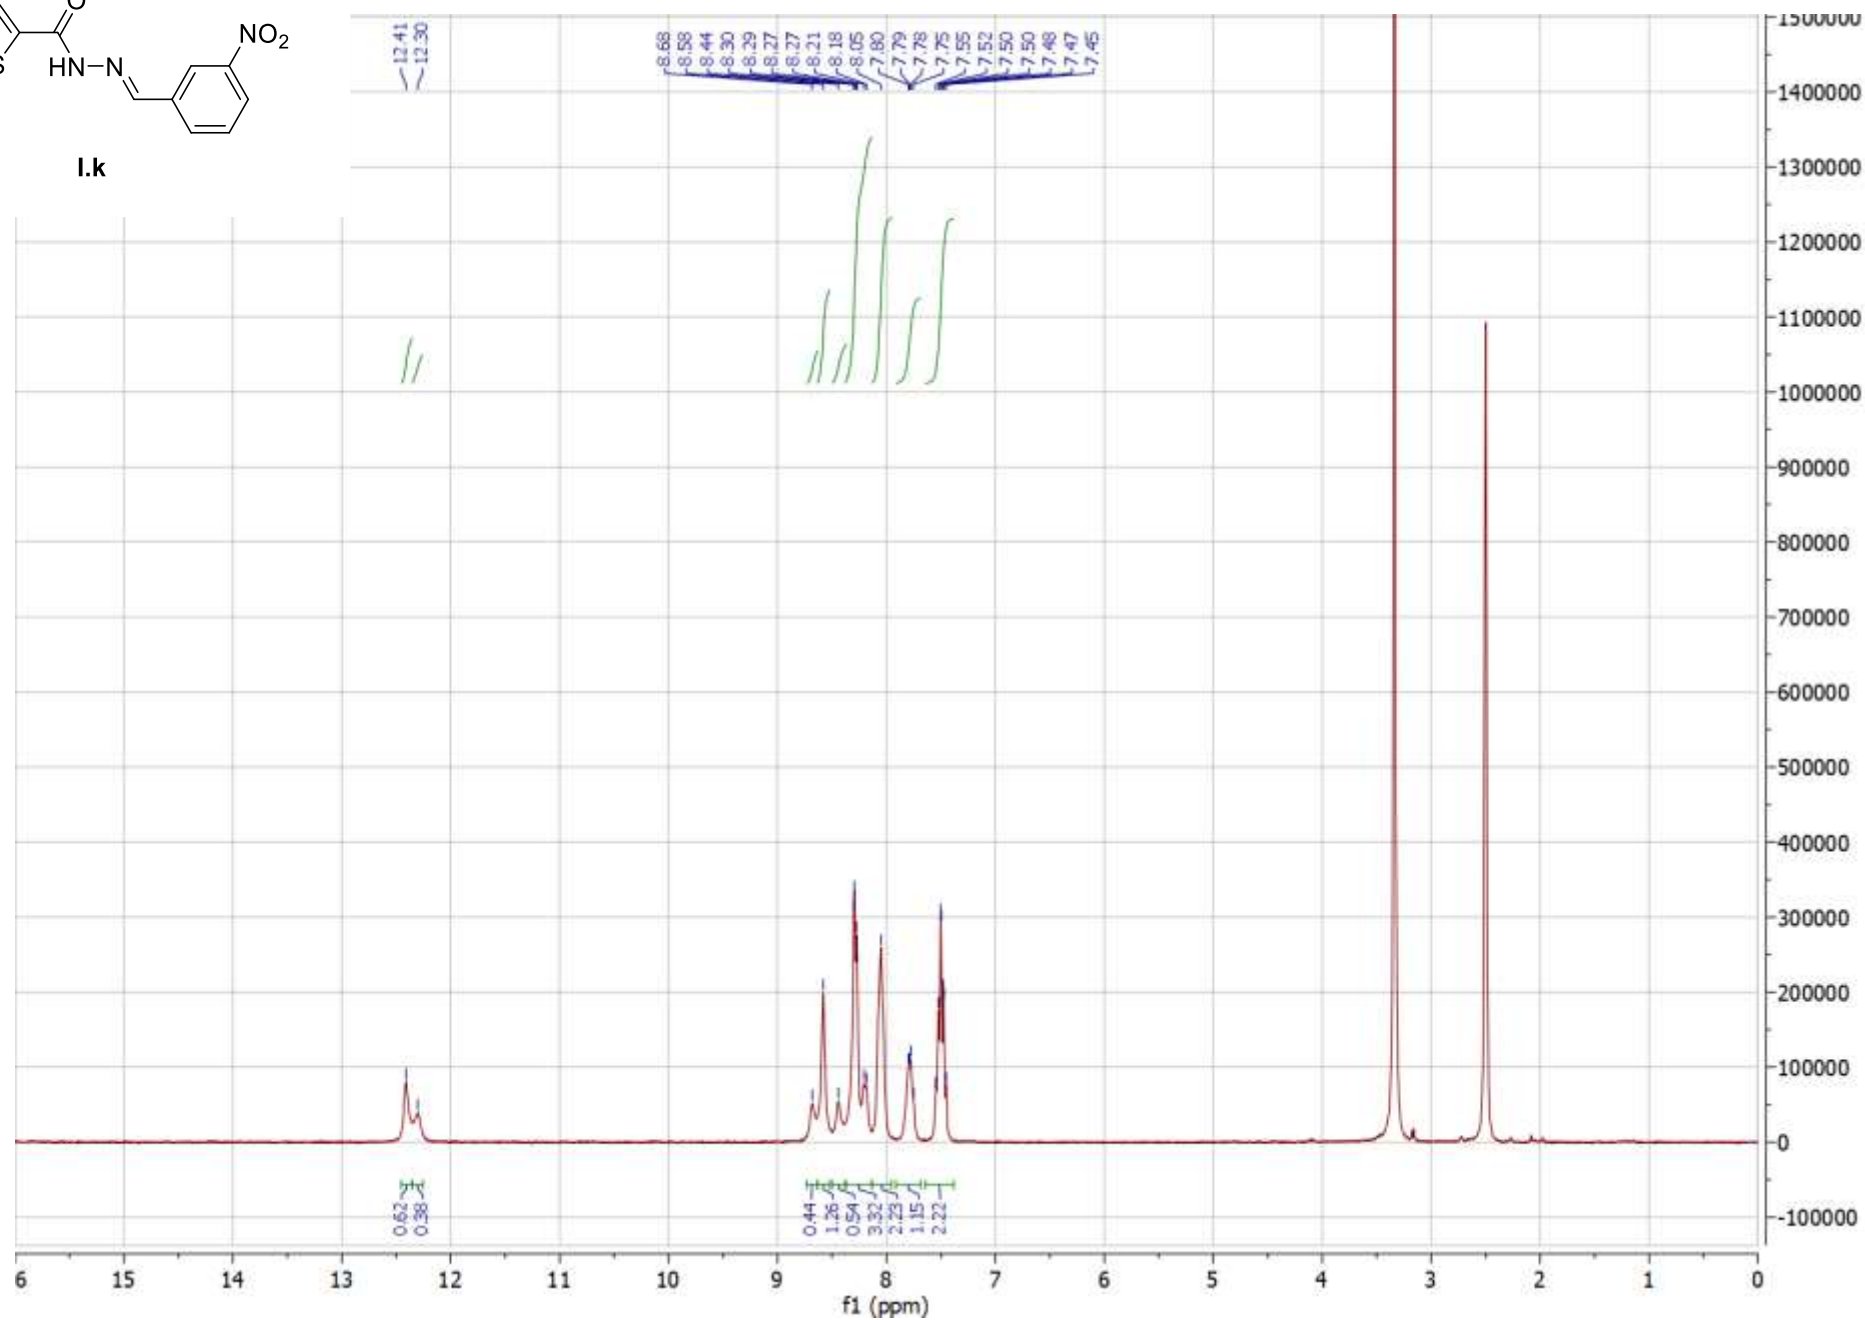

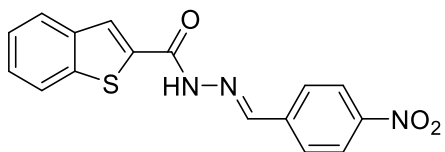

I.I

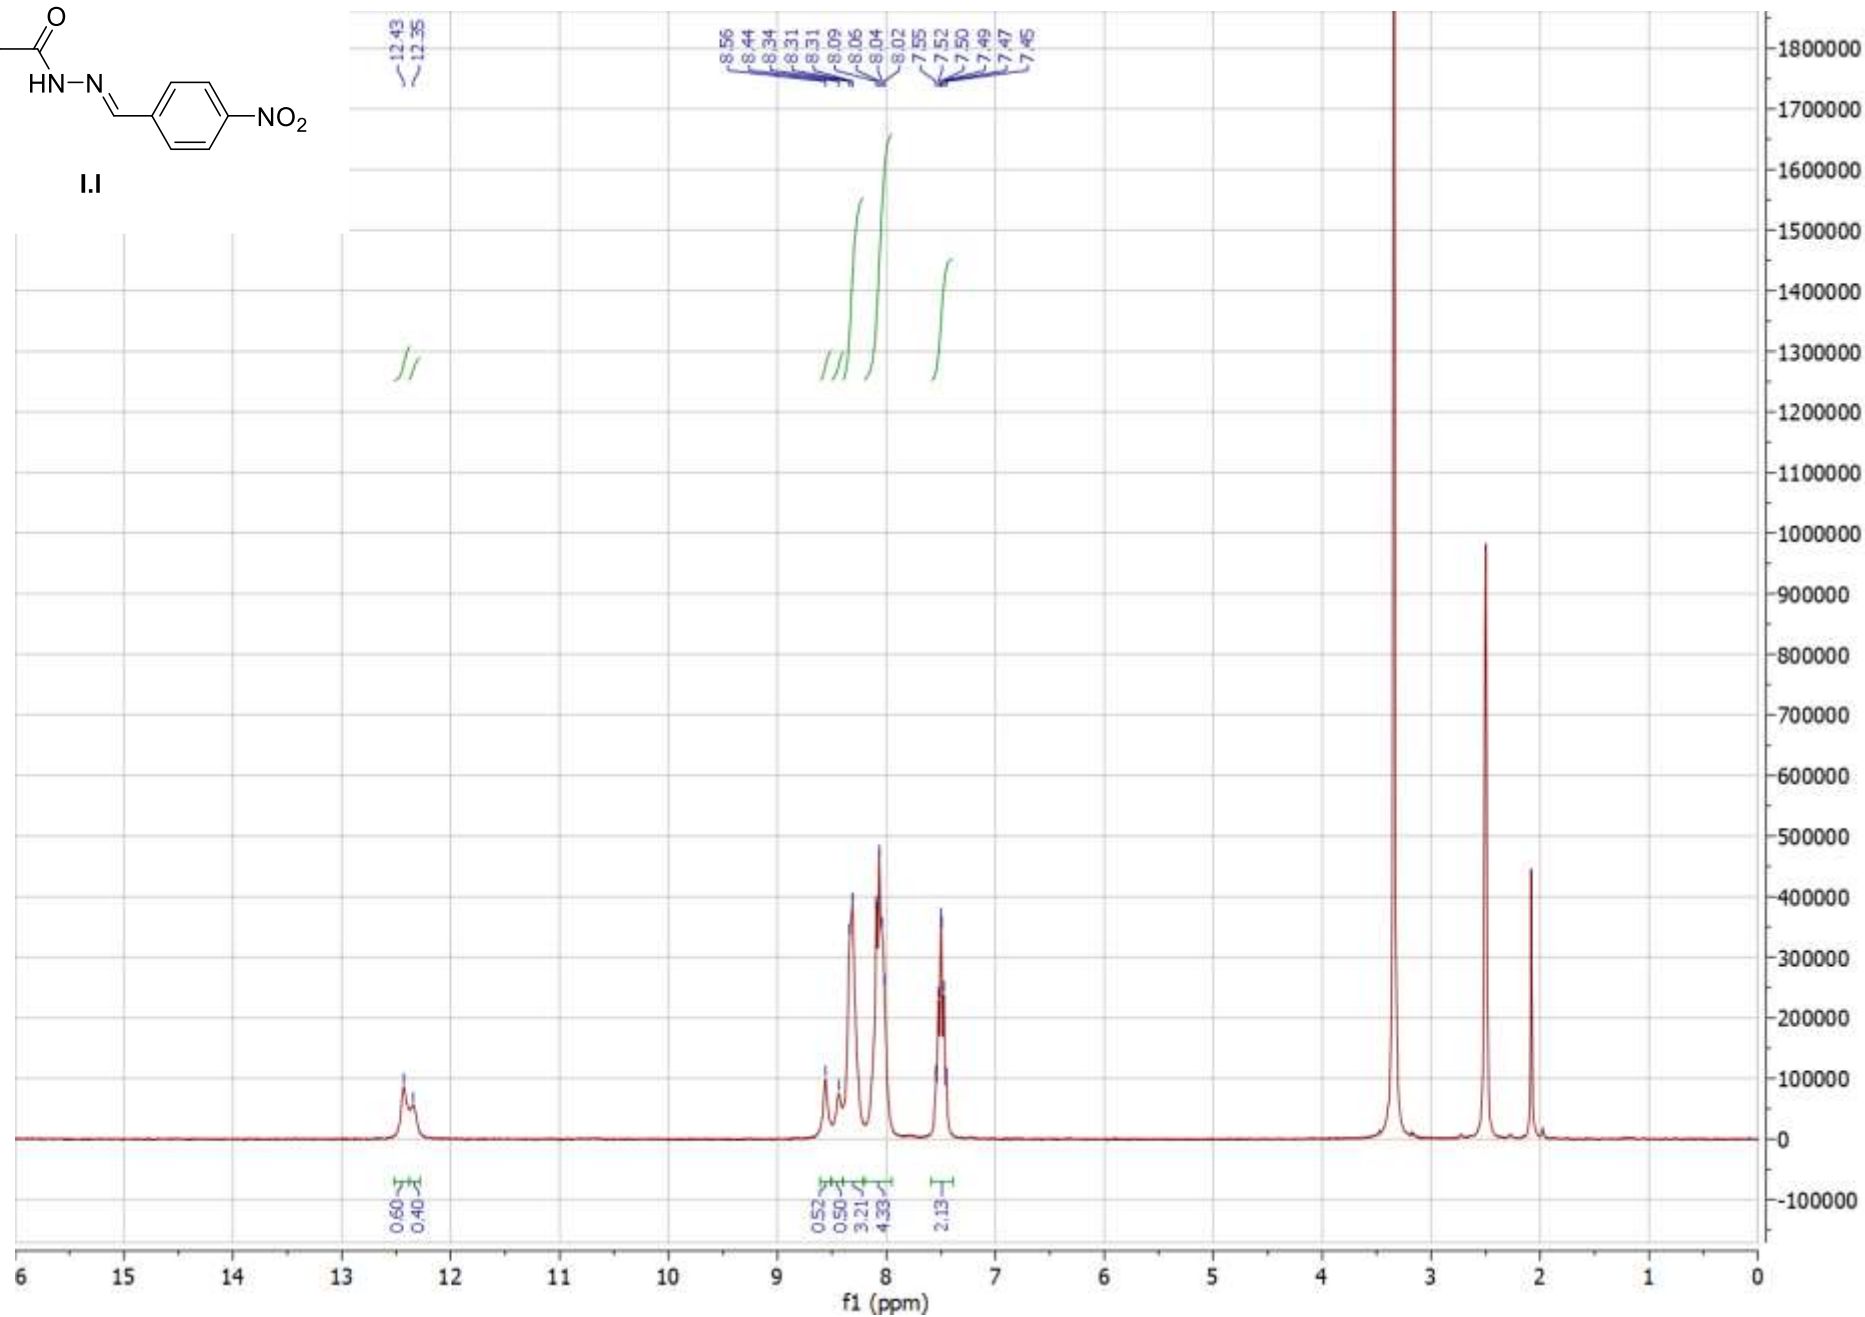

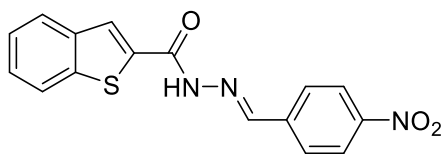

I.I

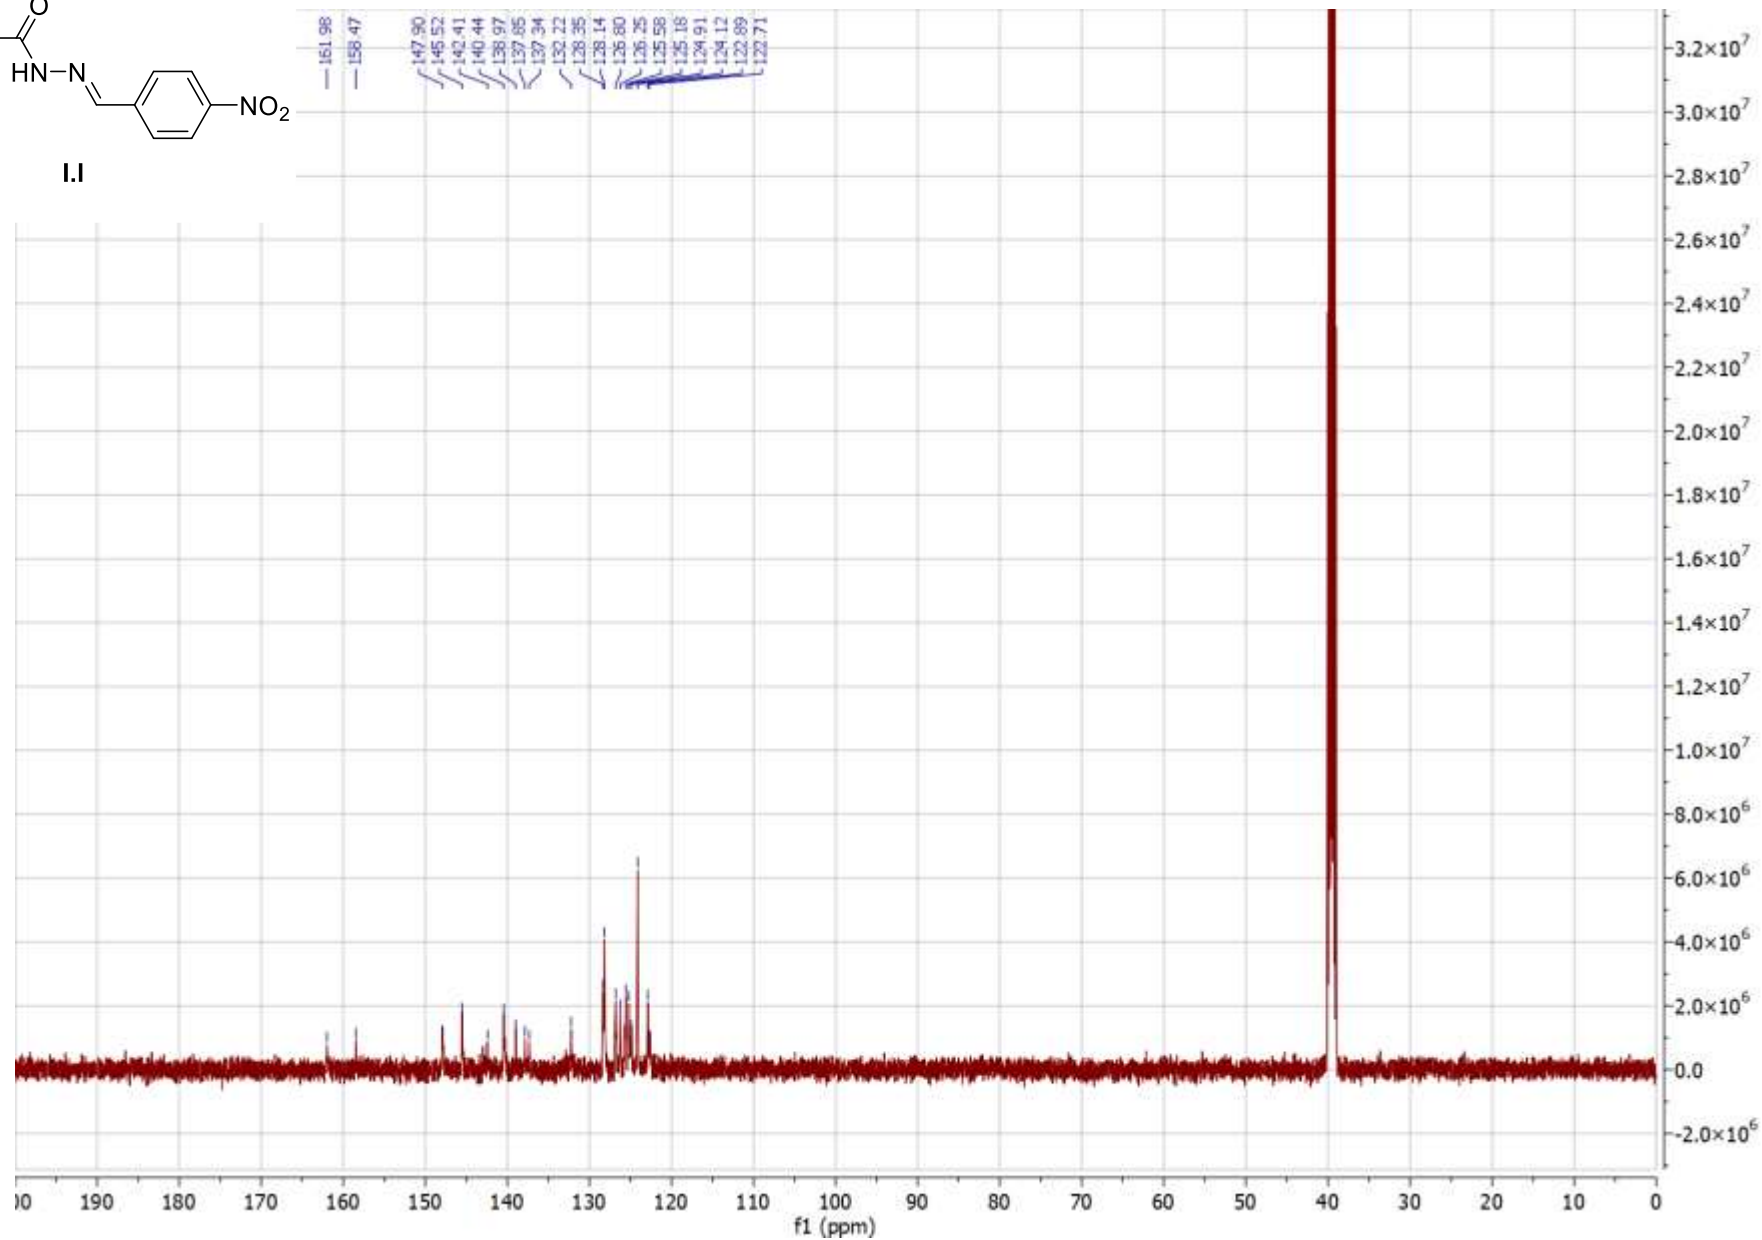

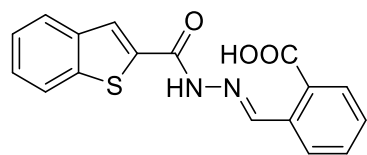

I.m

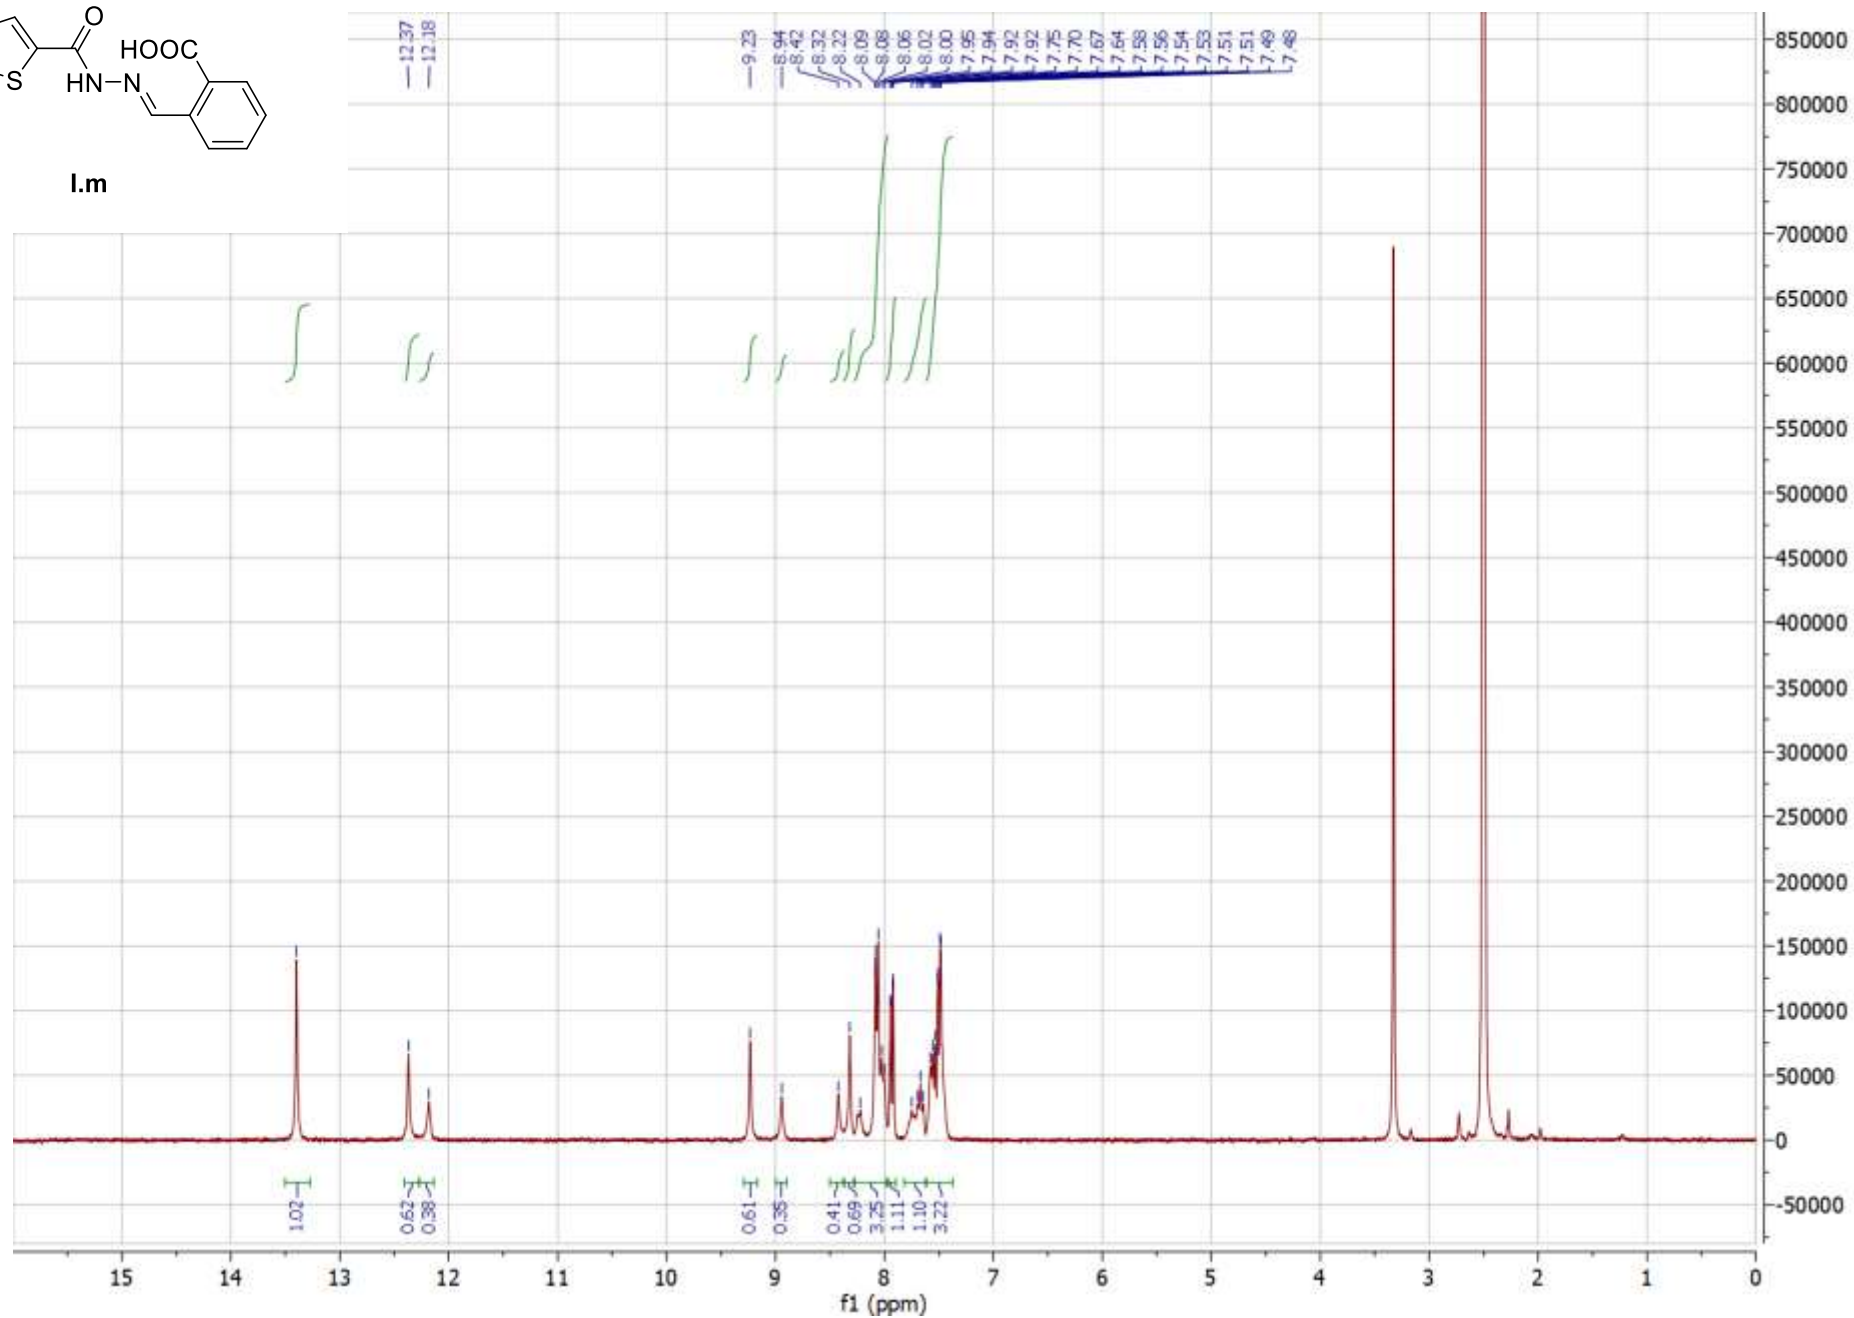

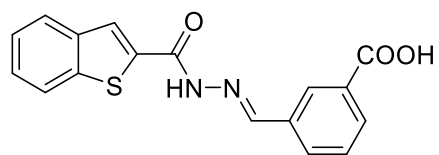

I.n

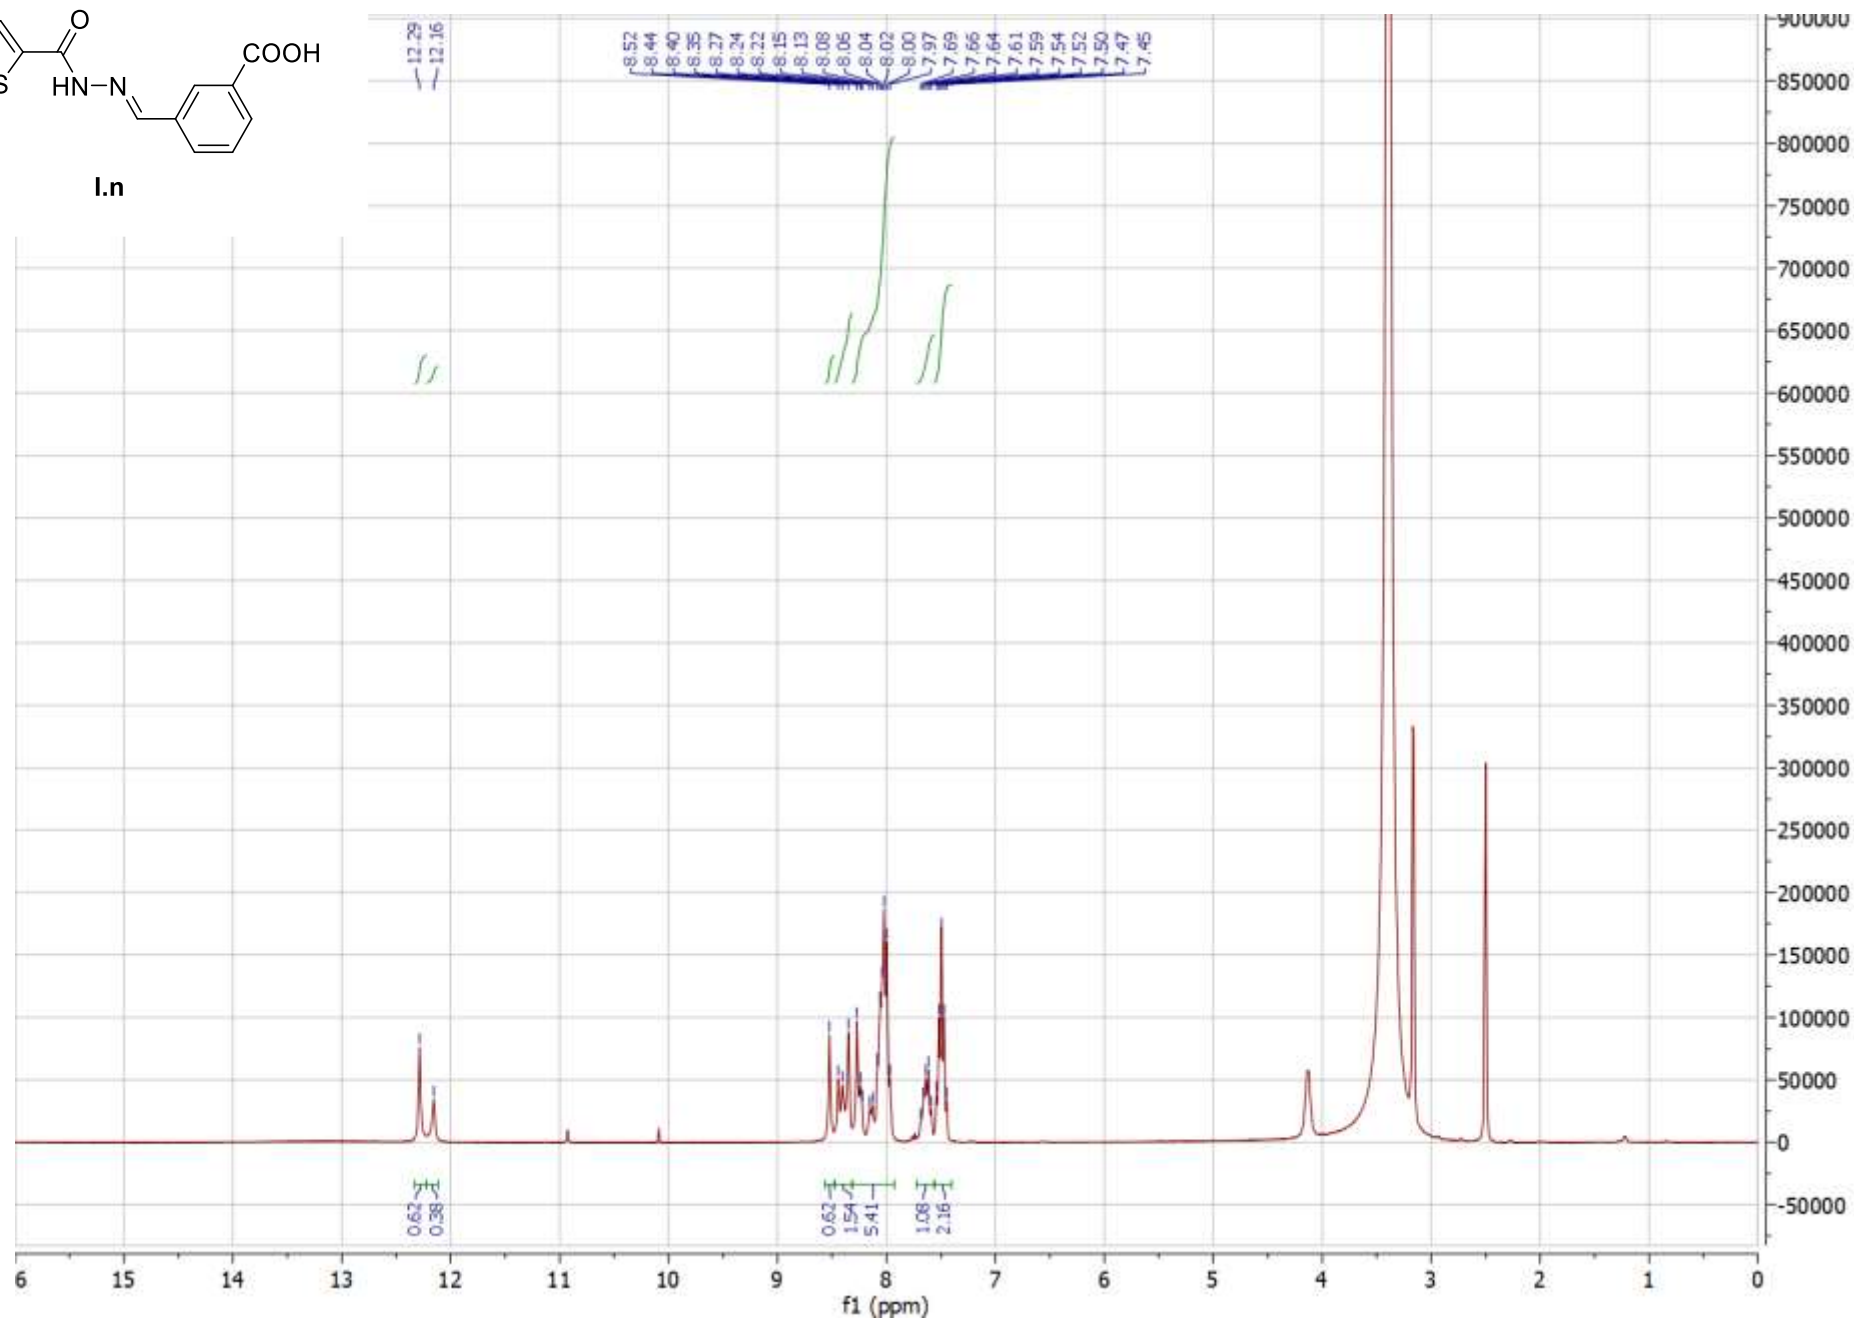

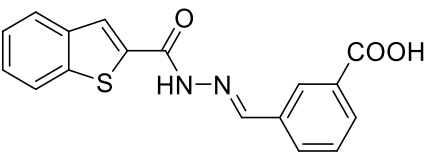

l.n

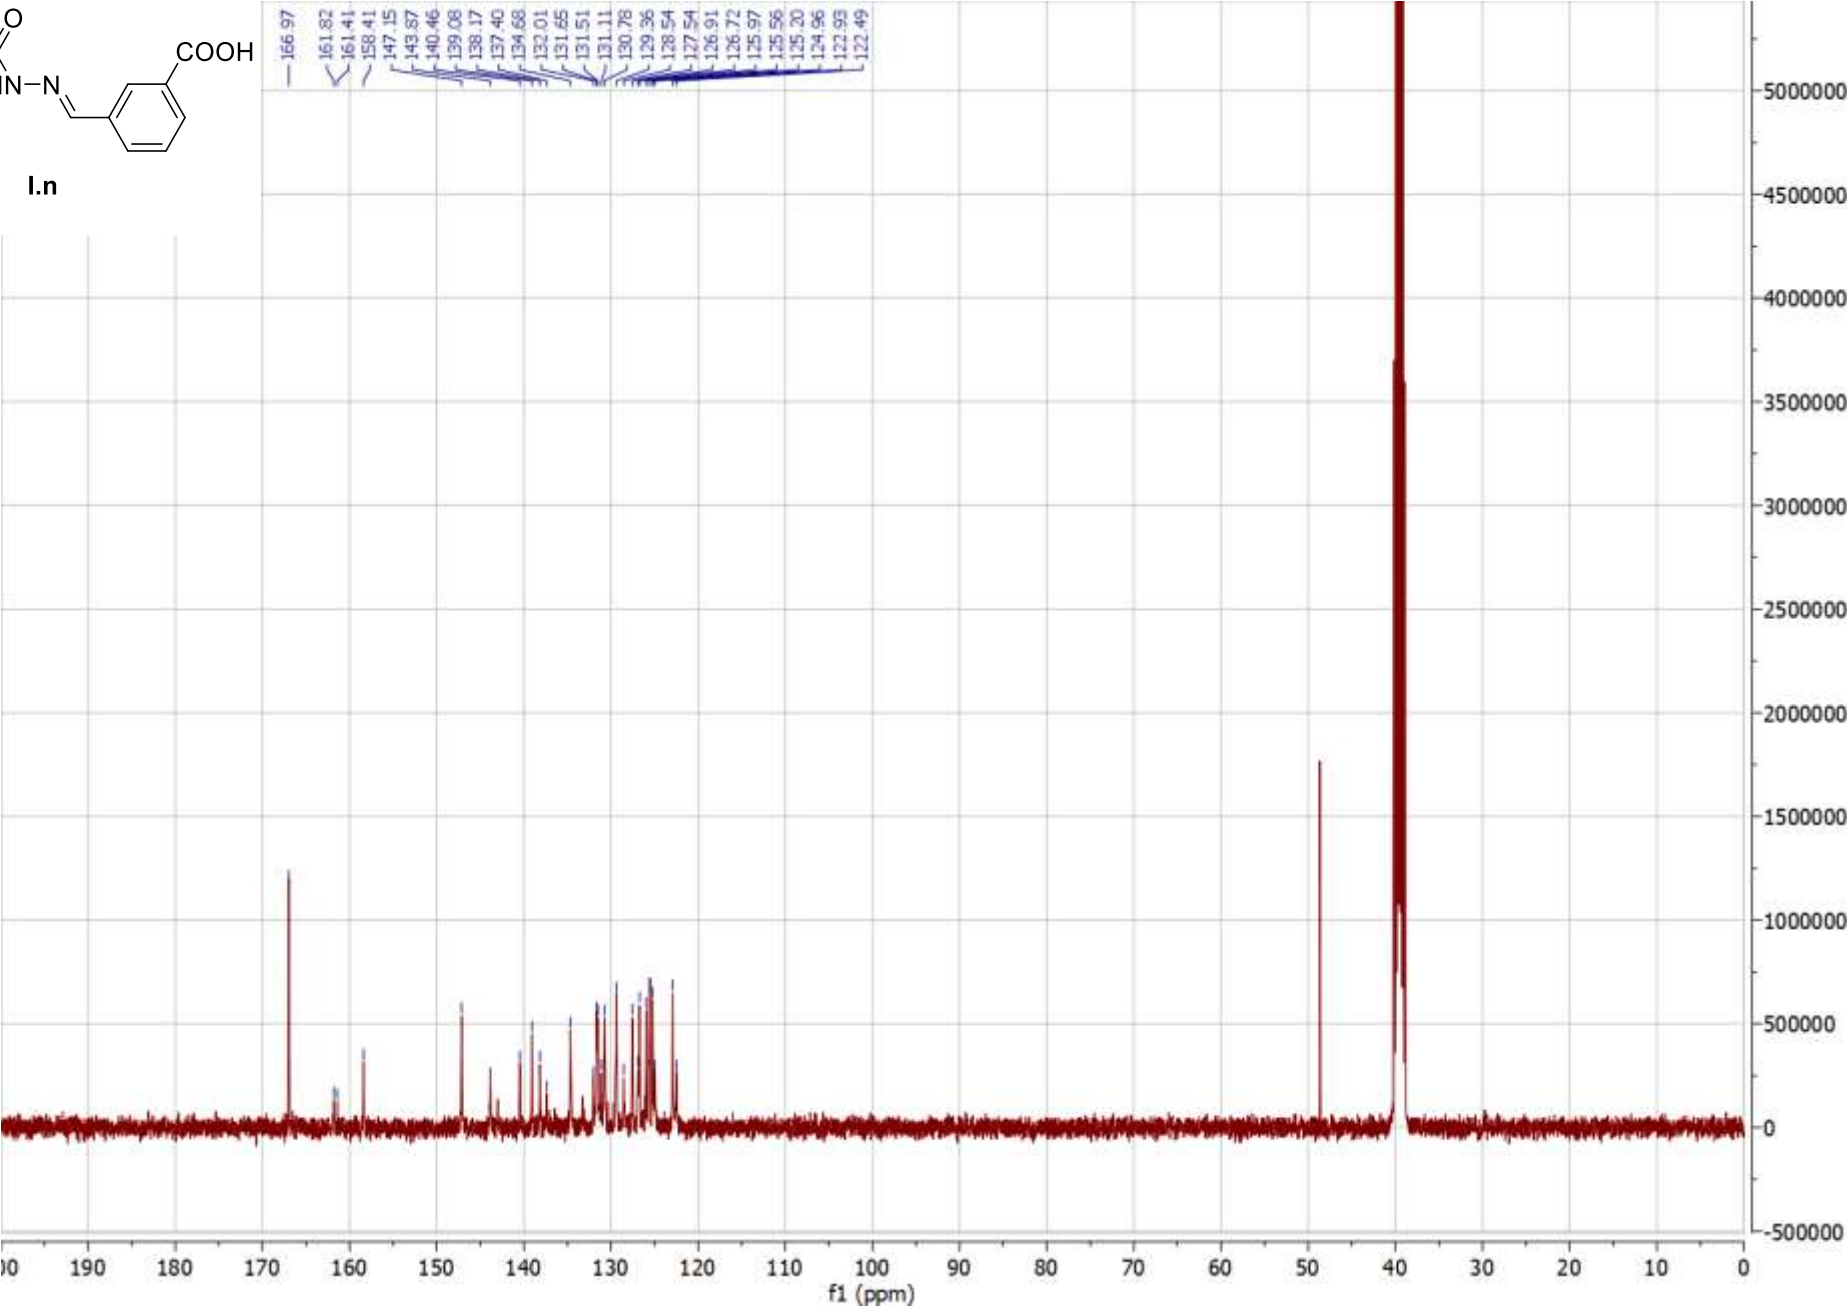



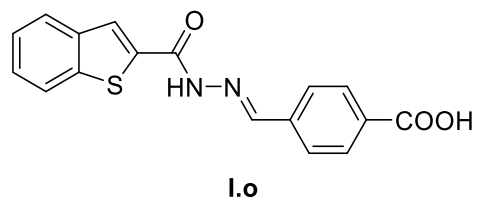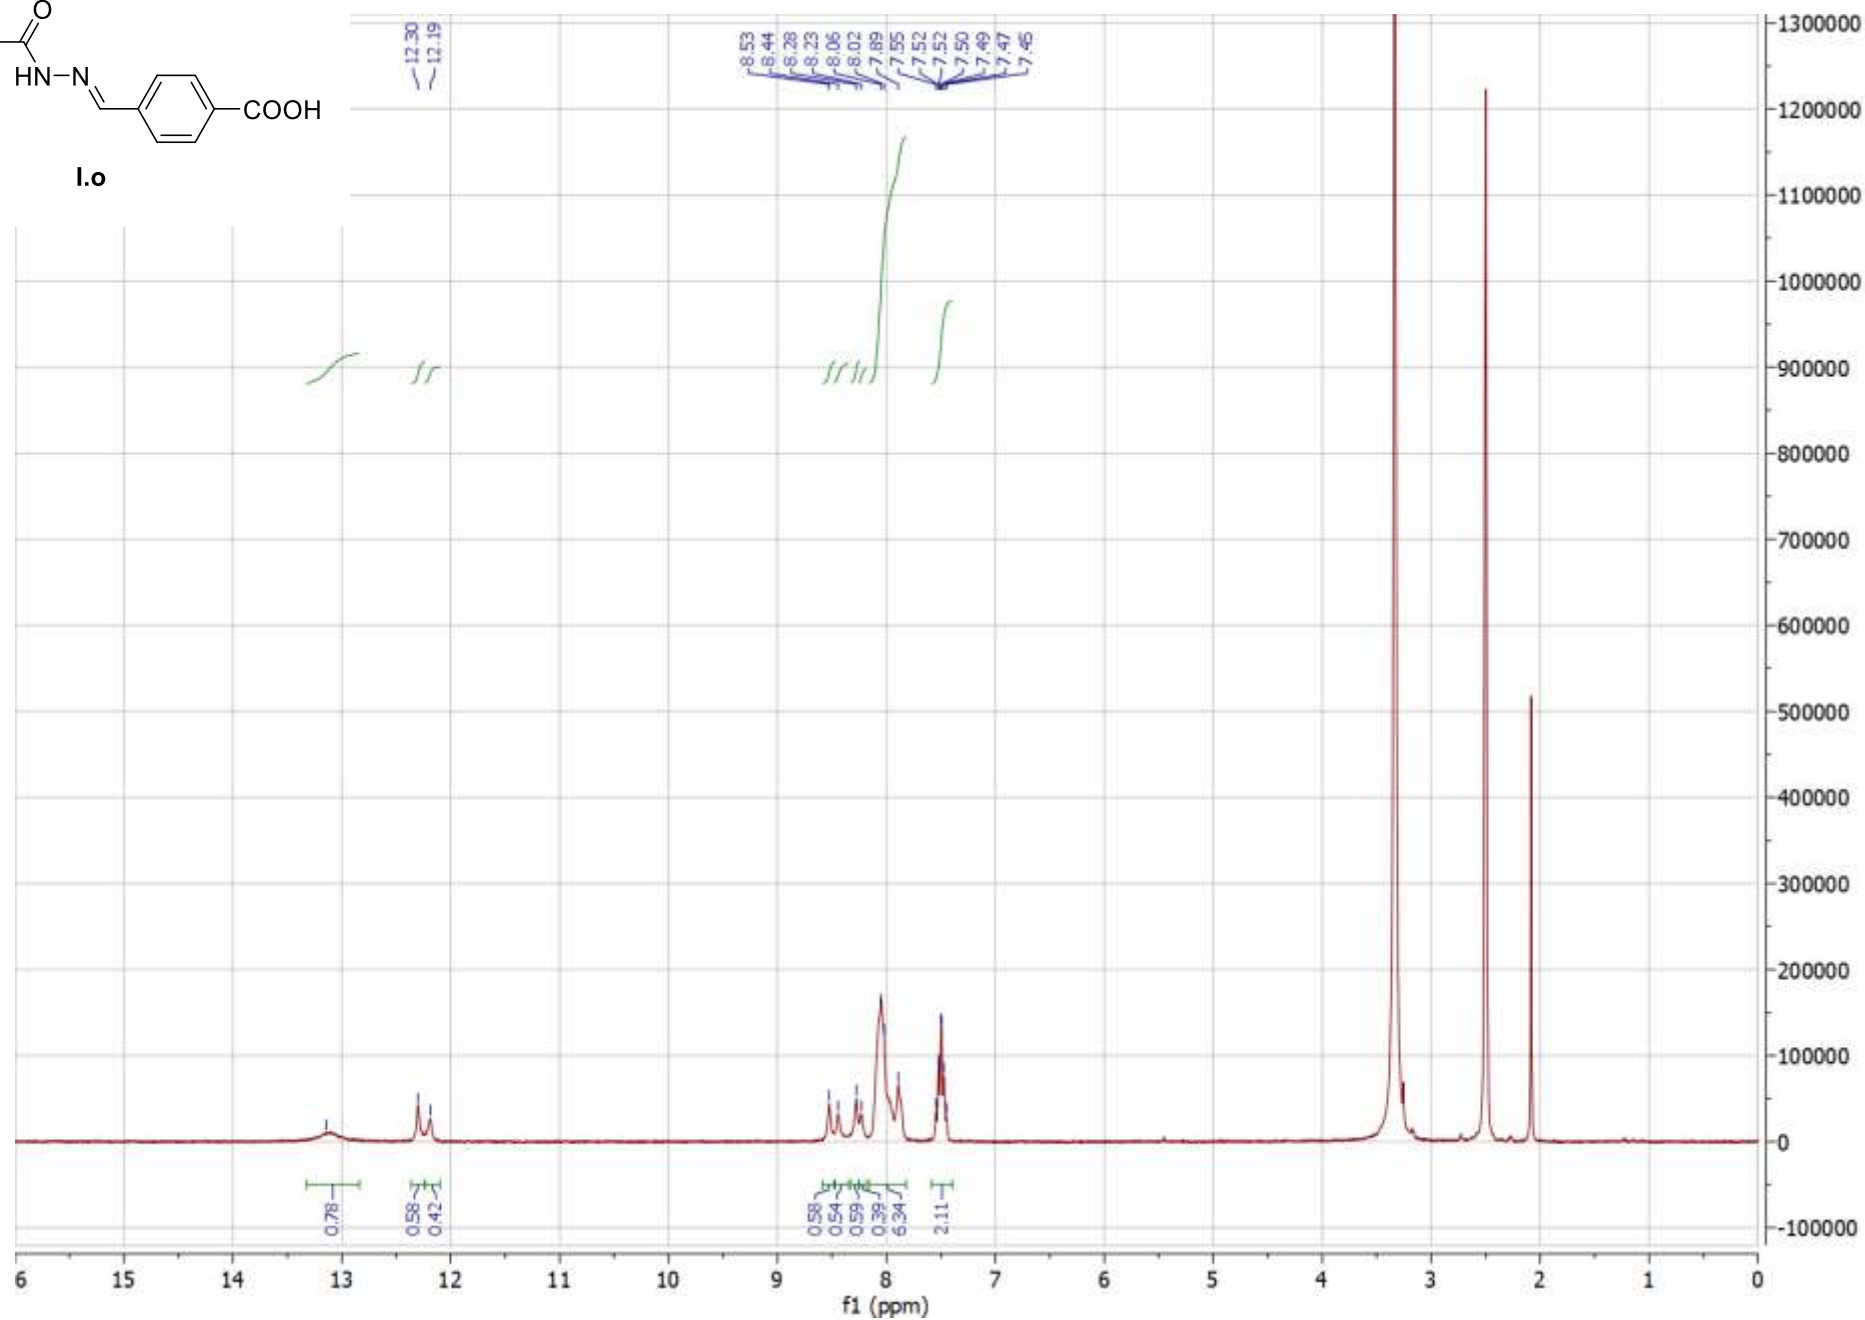

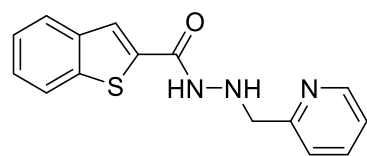

I.p

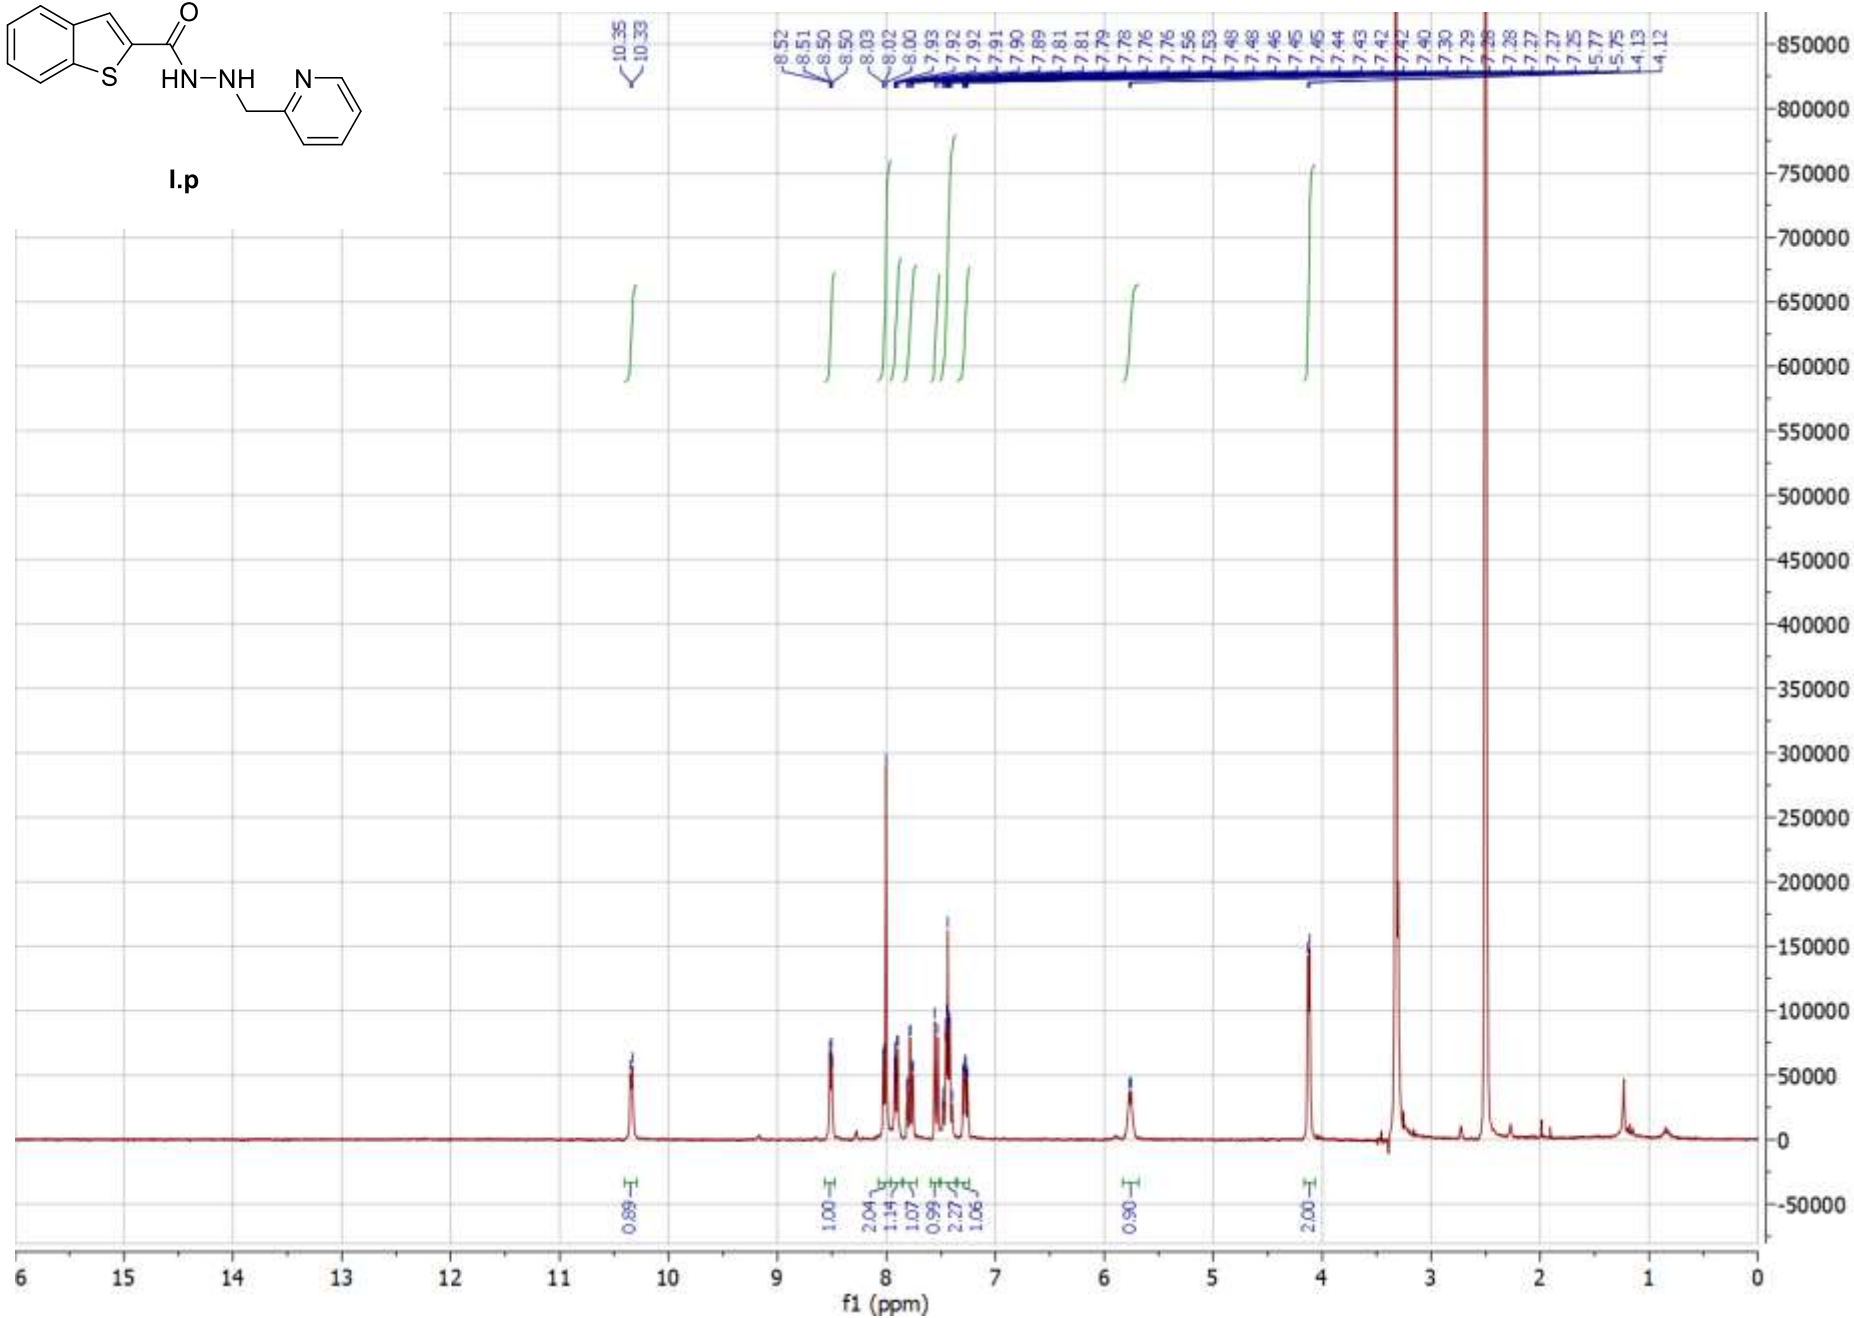

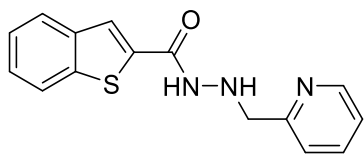

**l.p**

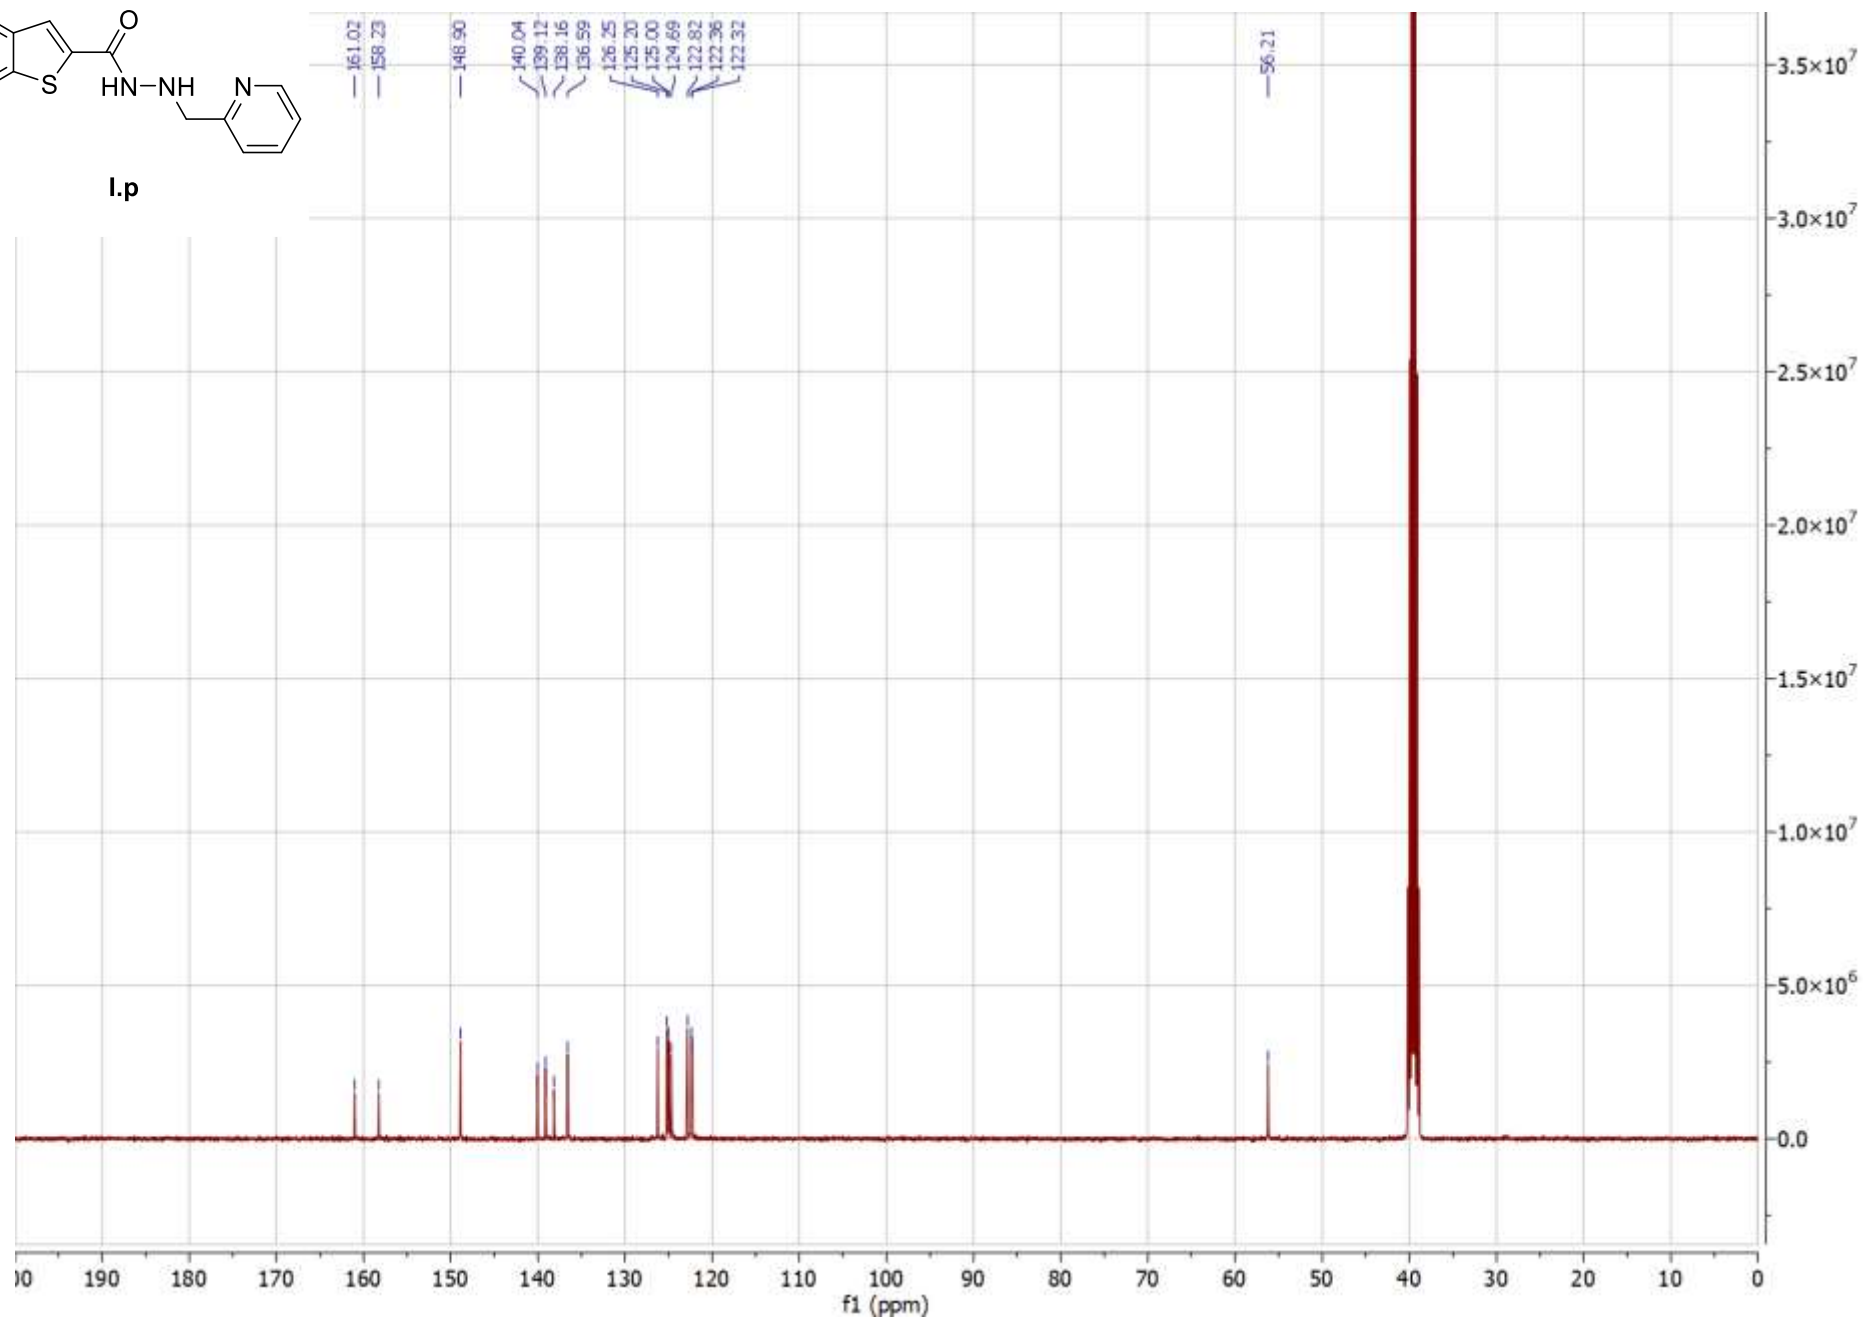

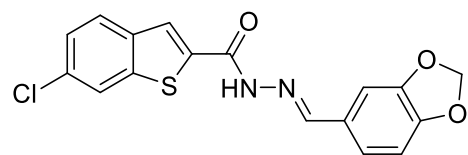

II.a

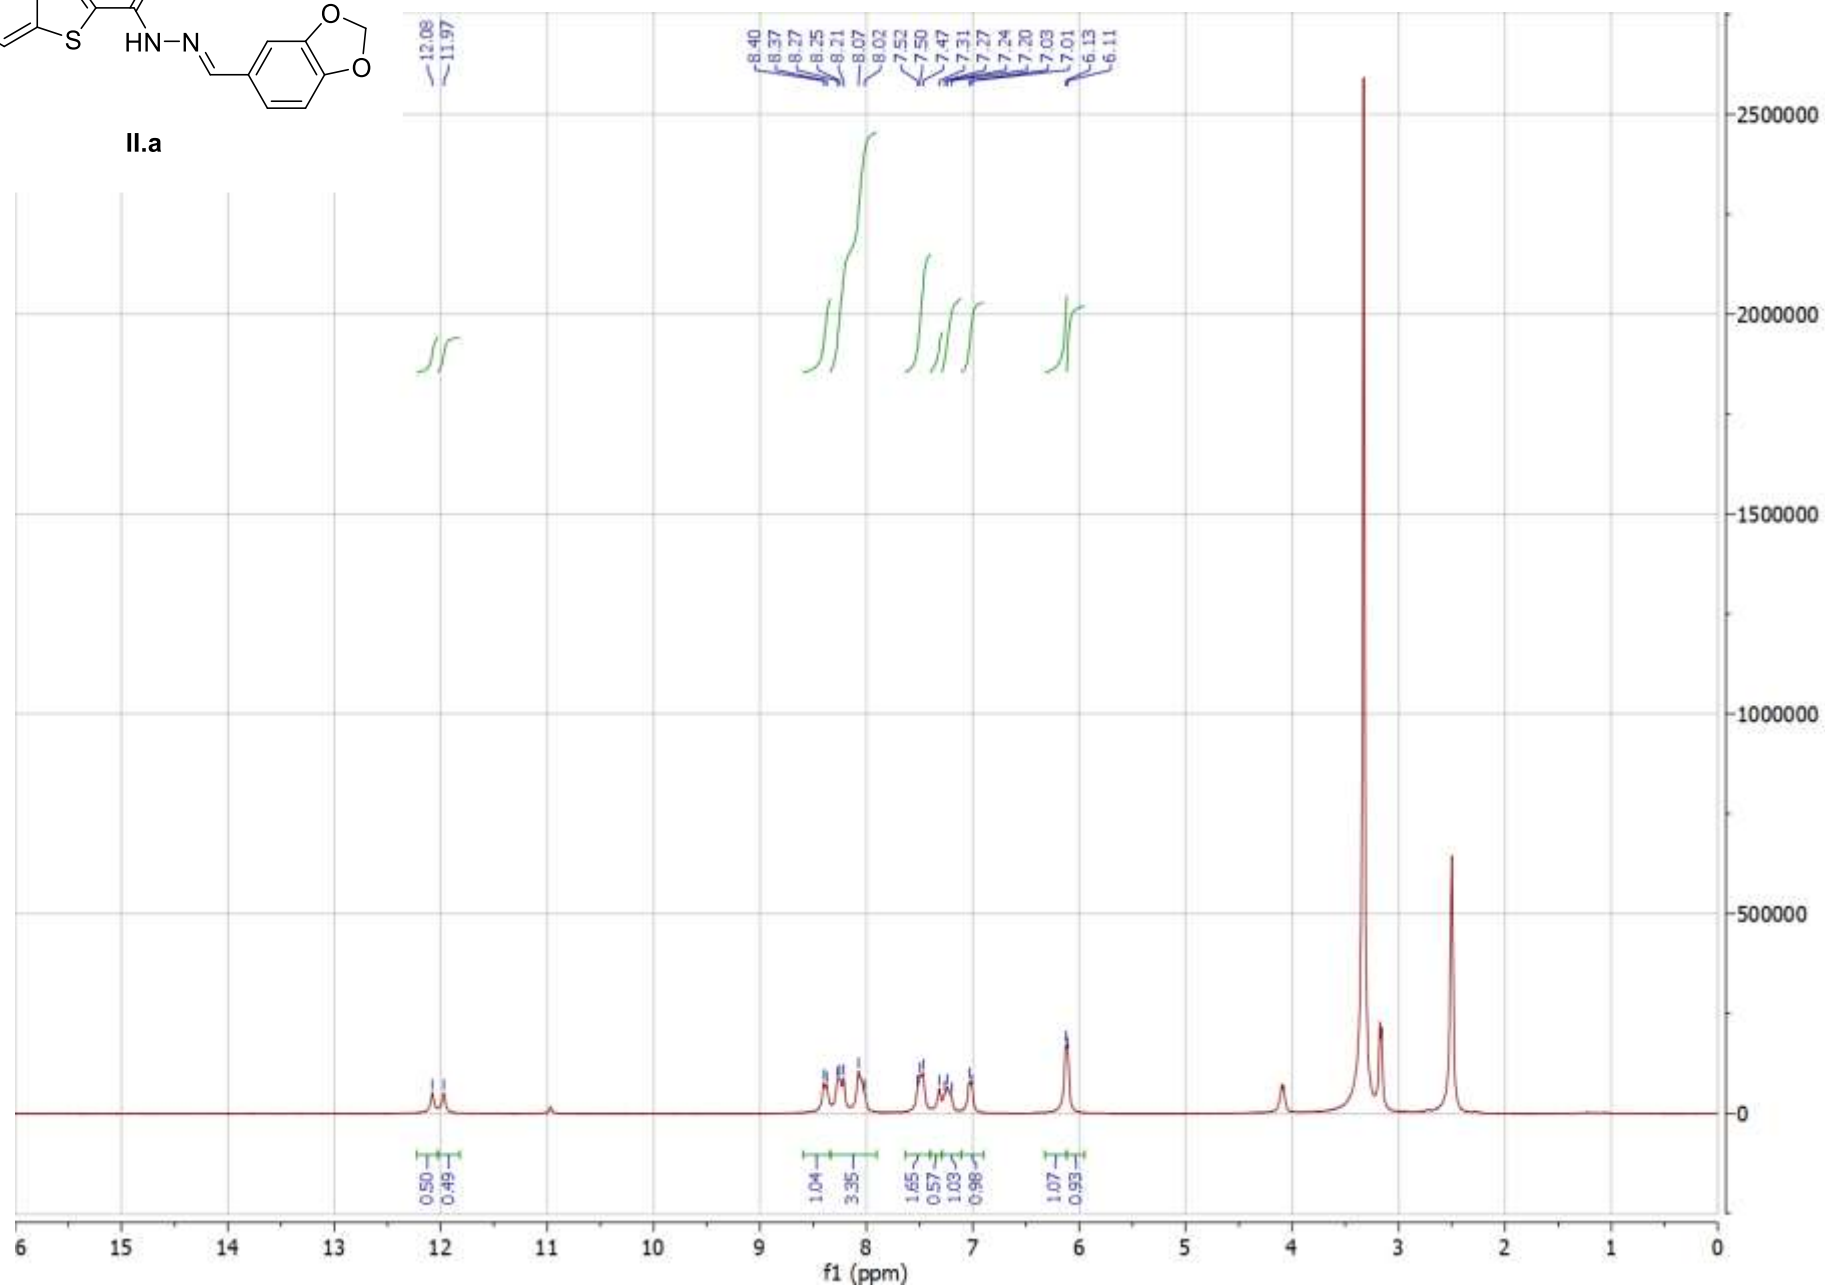

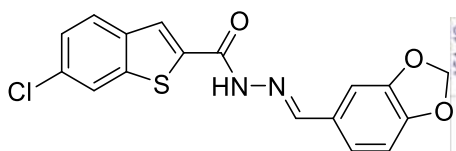

II.a

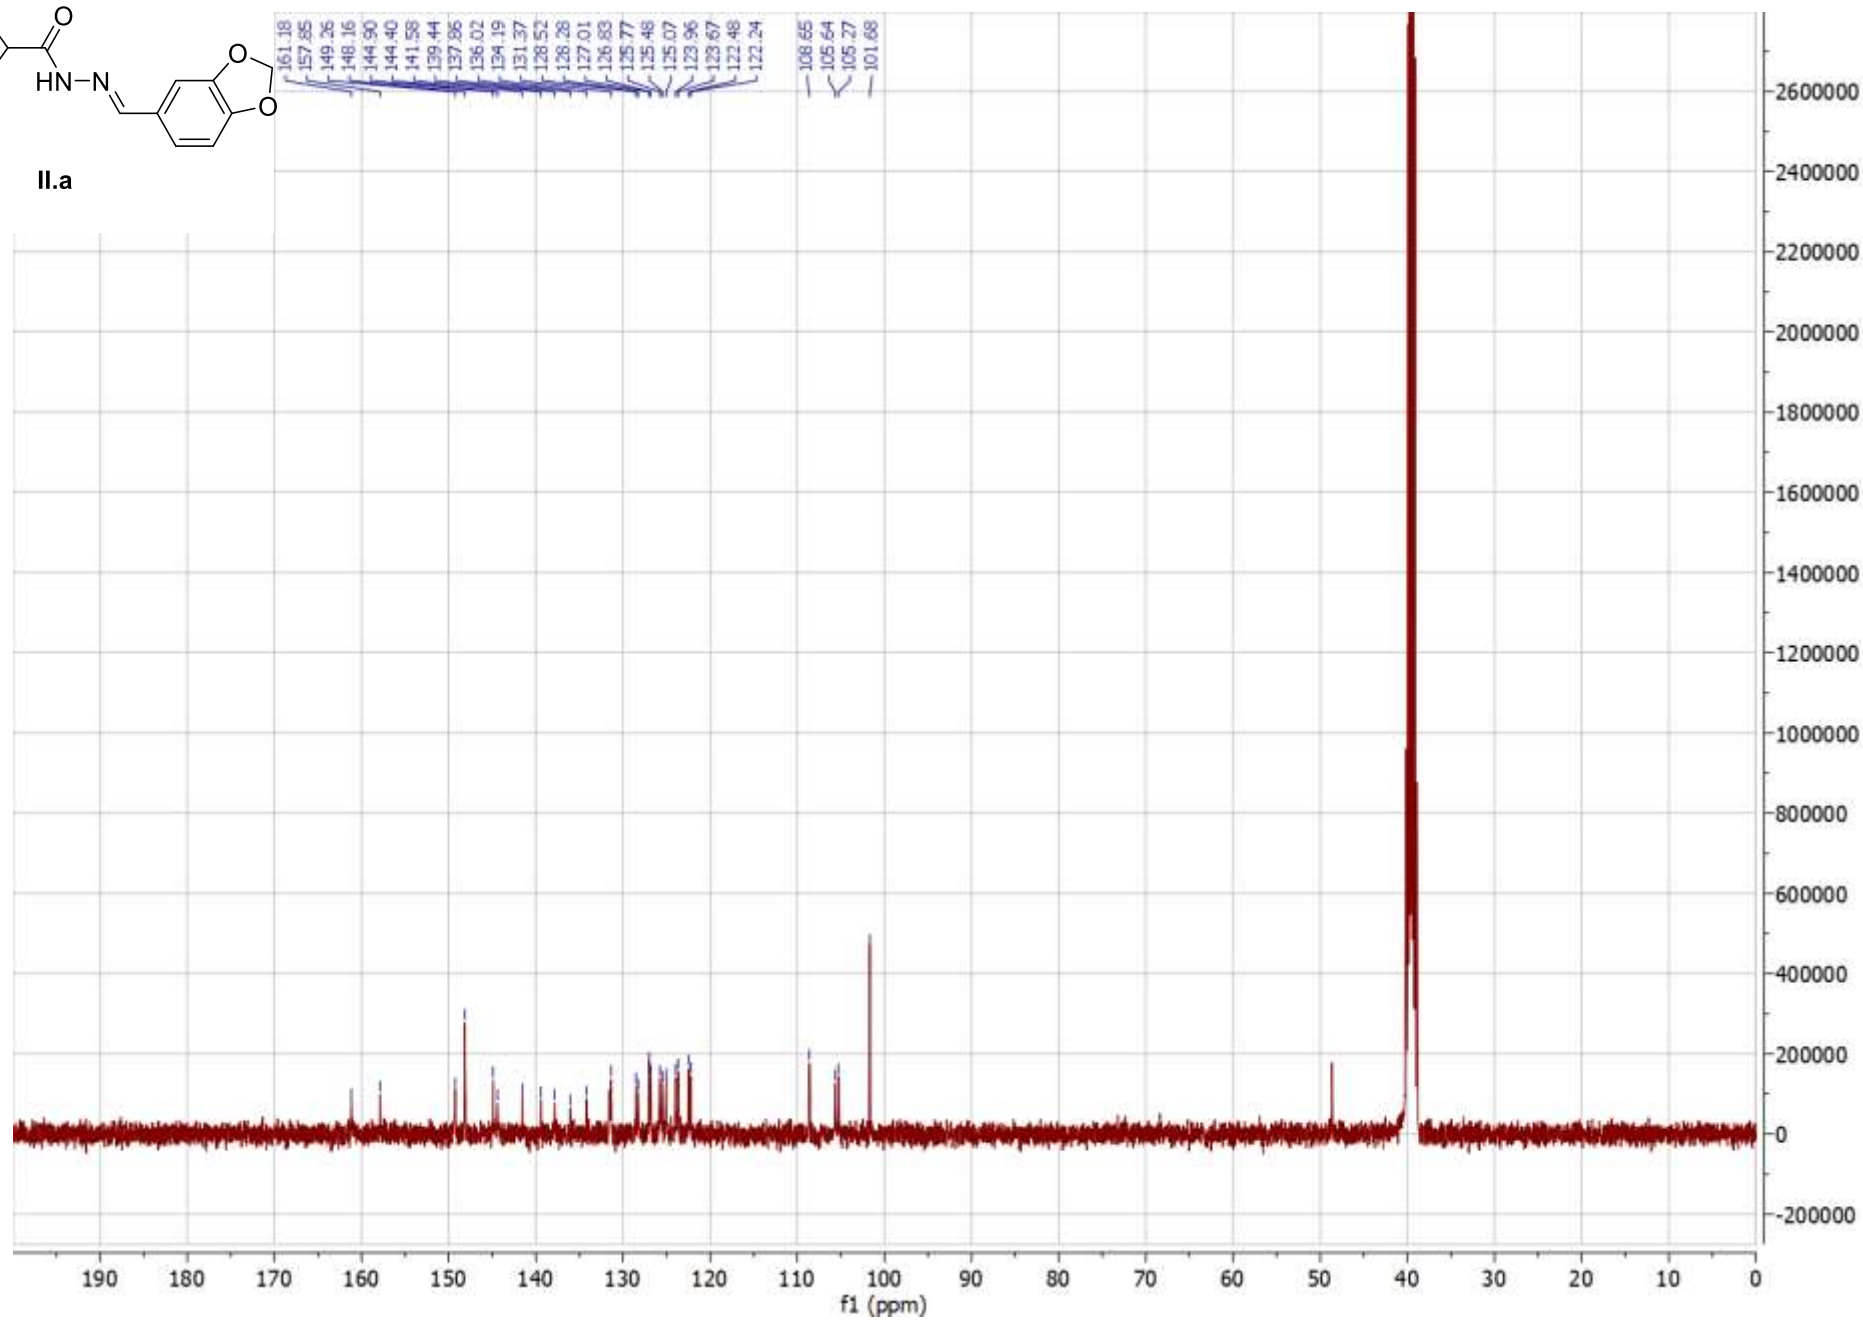

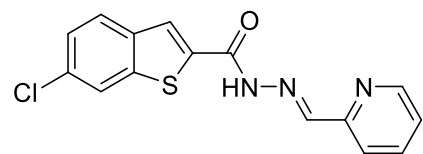

II.b

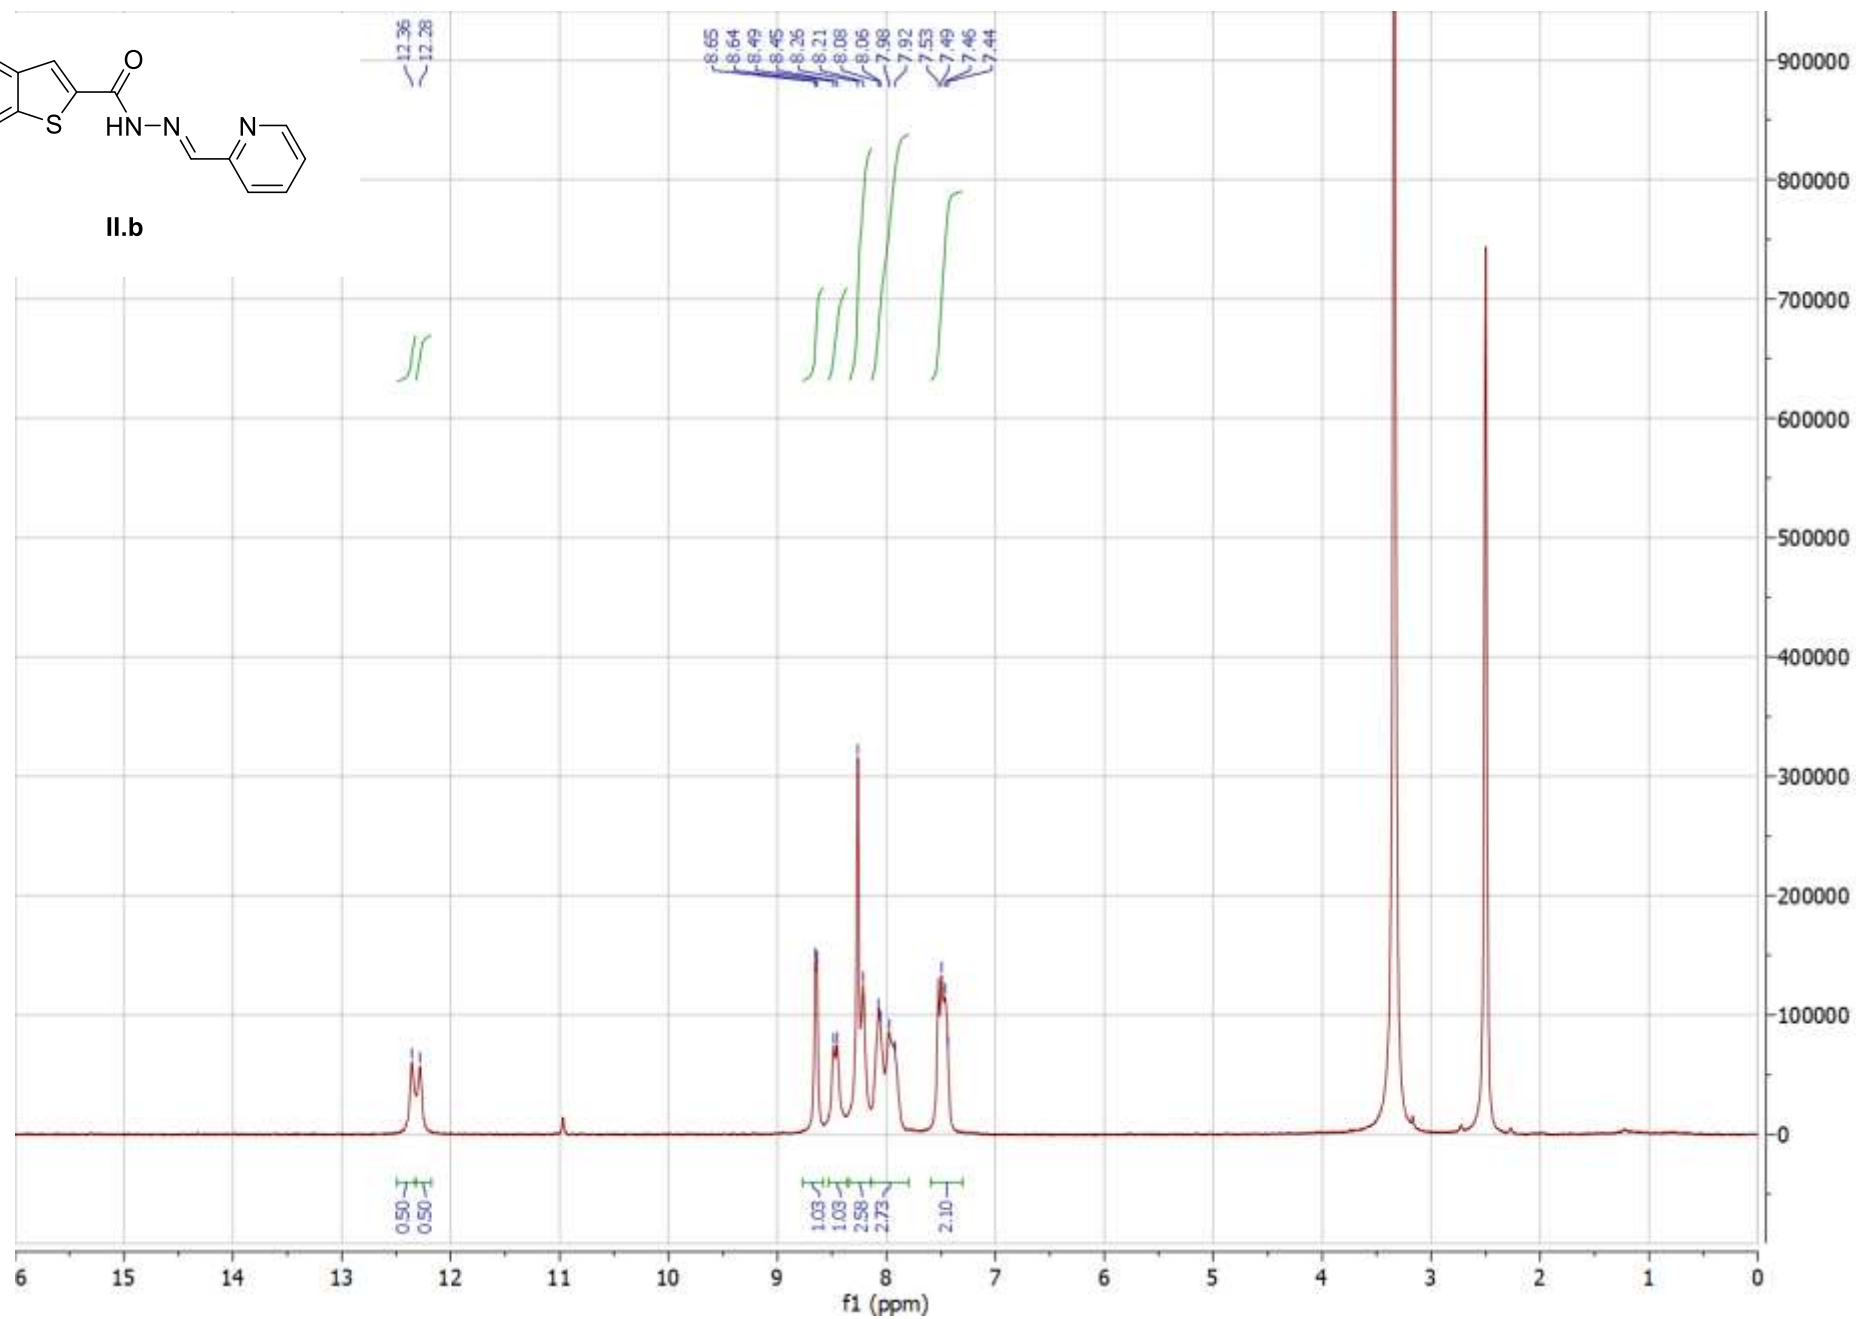

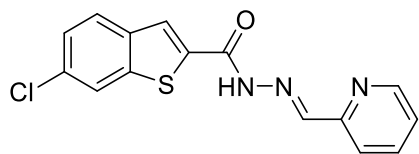

II.b

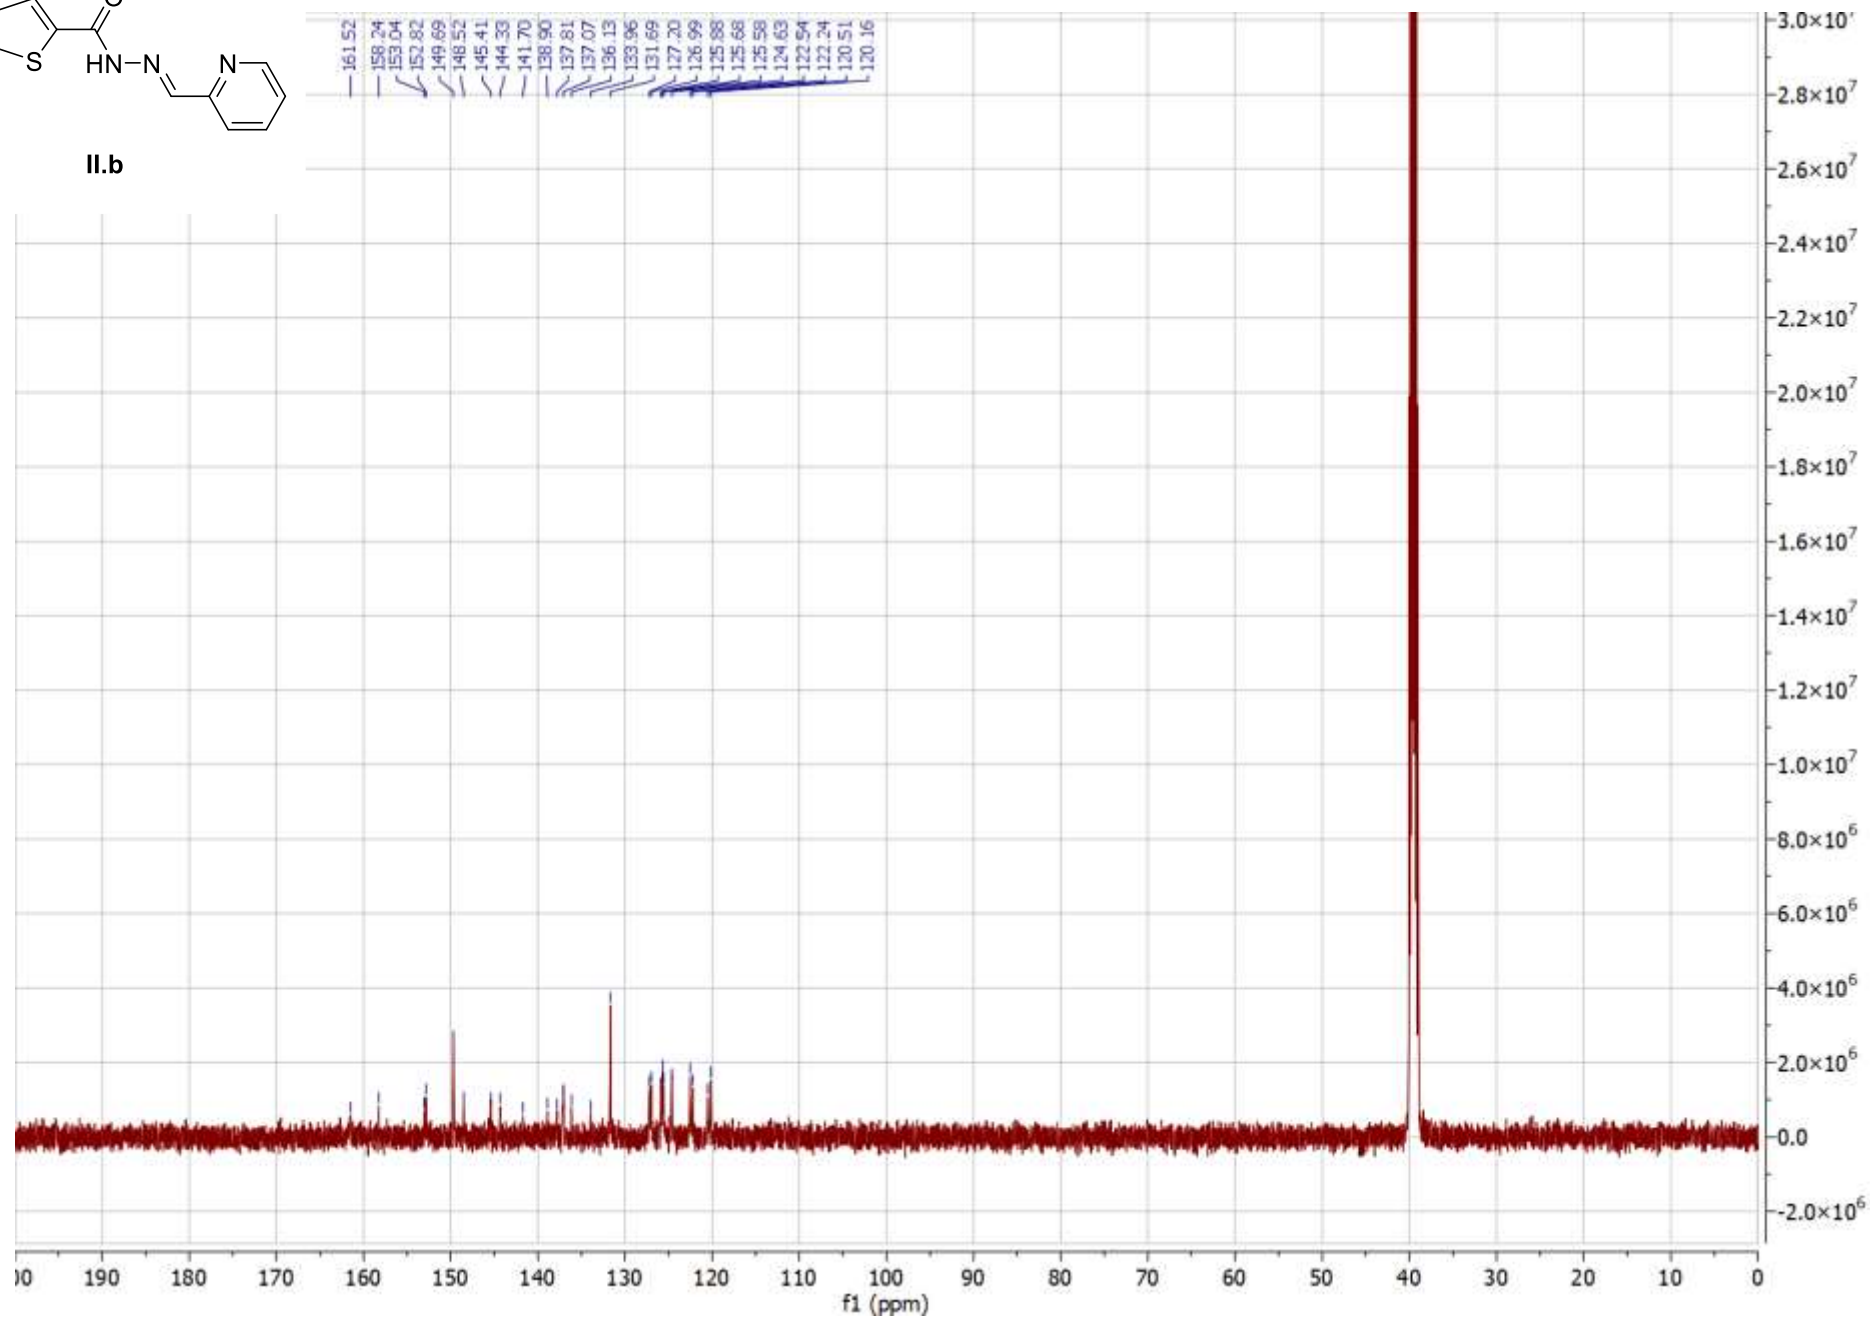

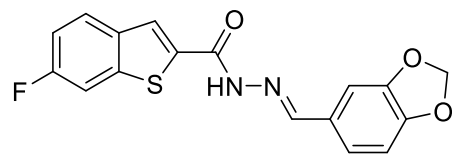

II.c

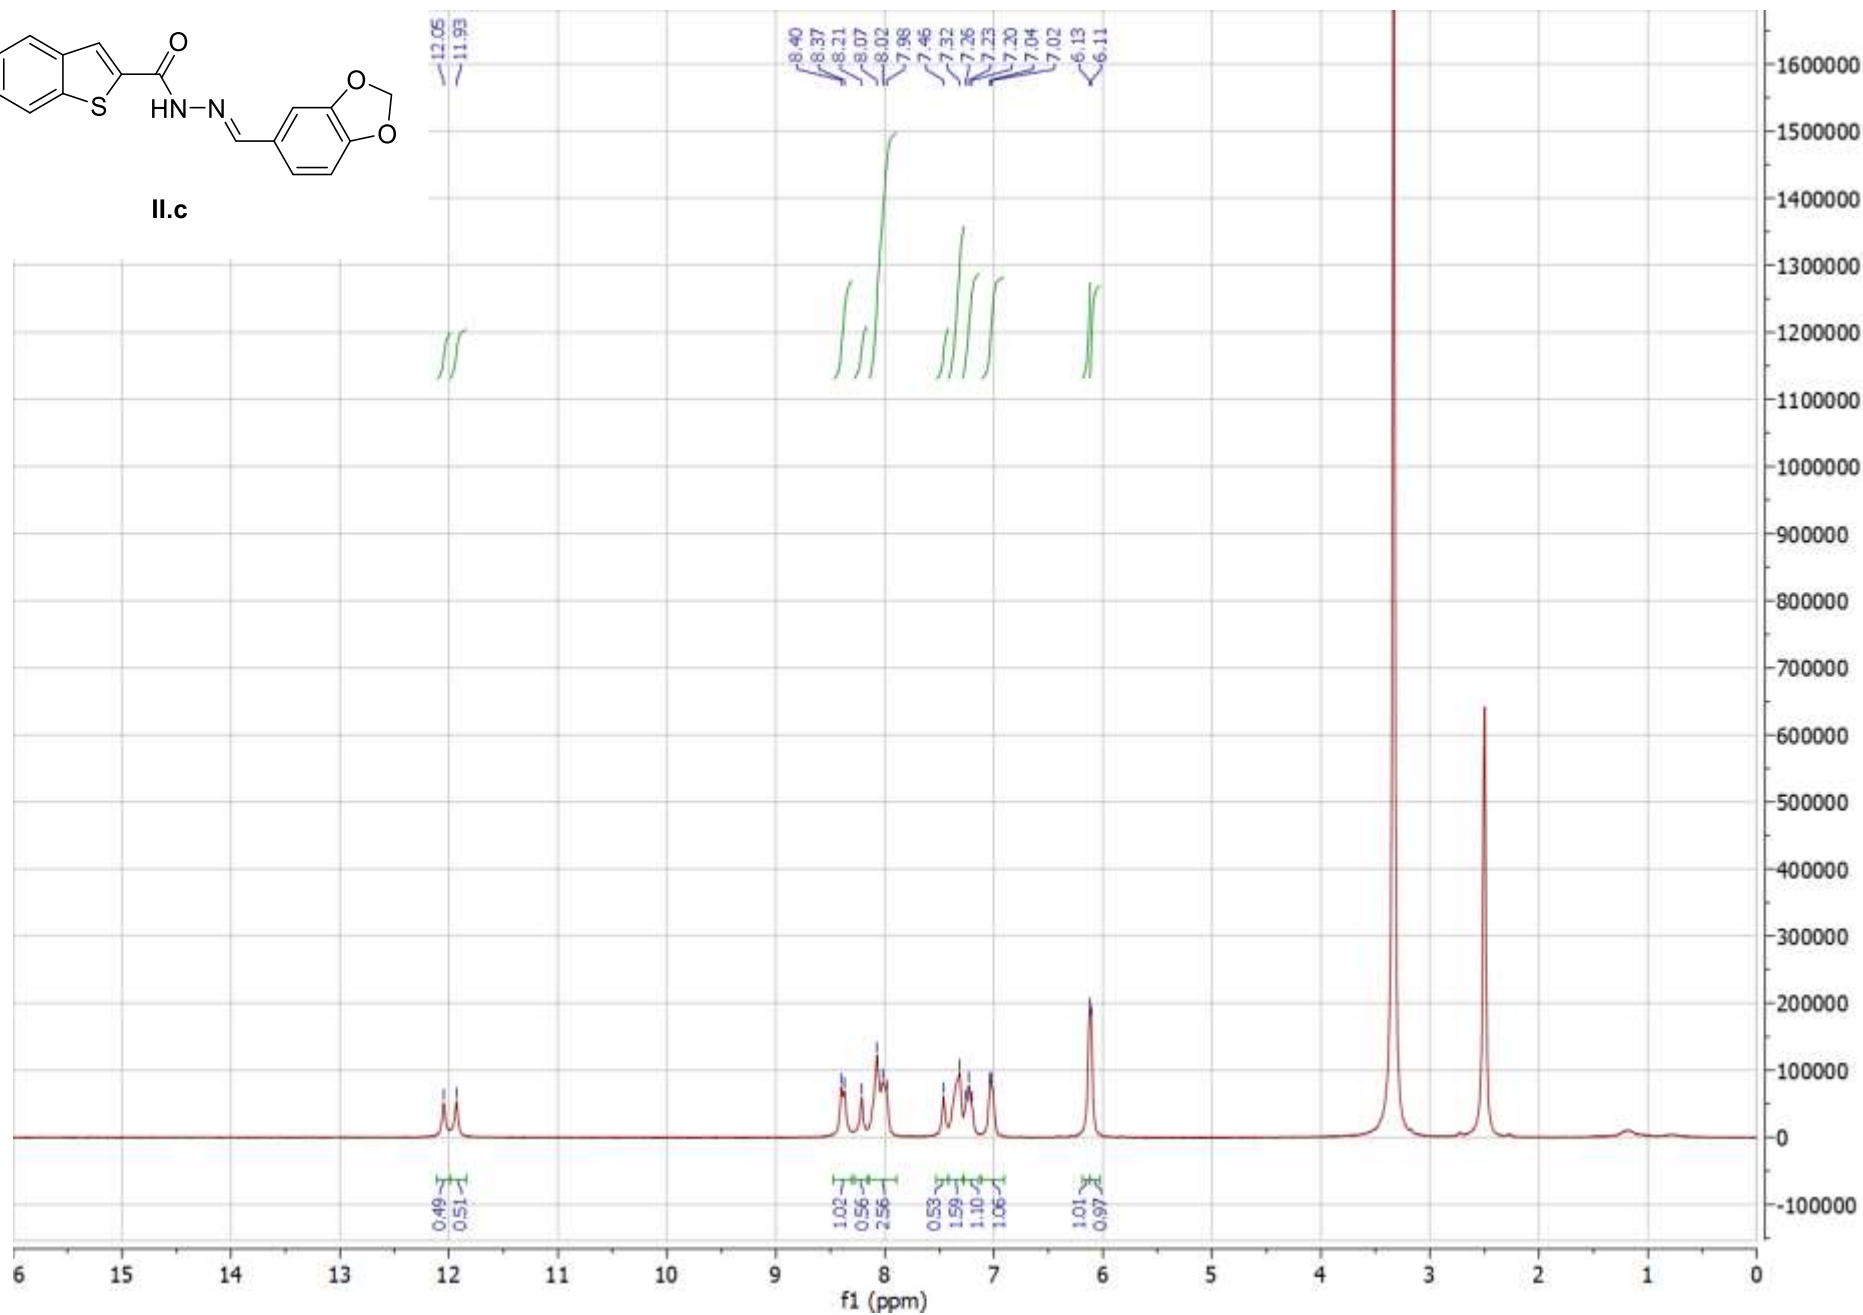



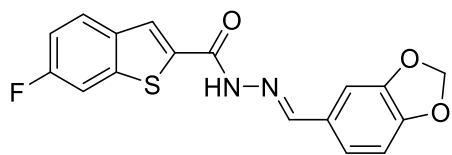

II.c

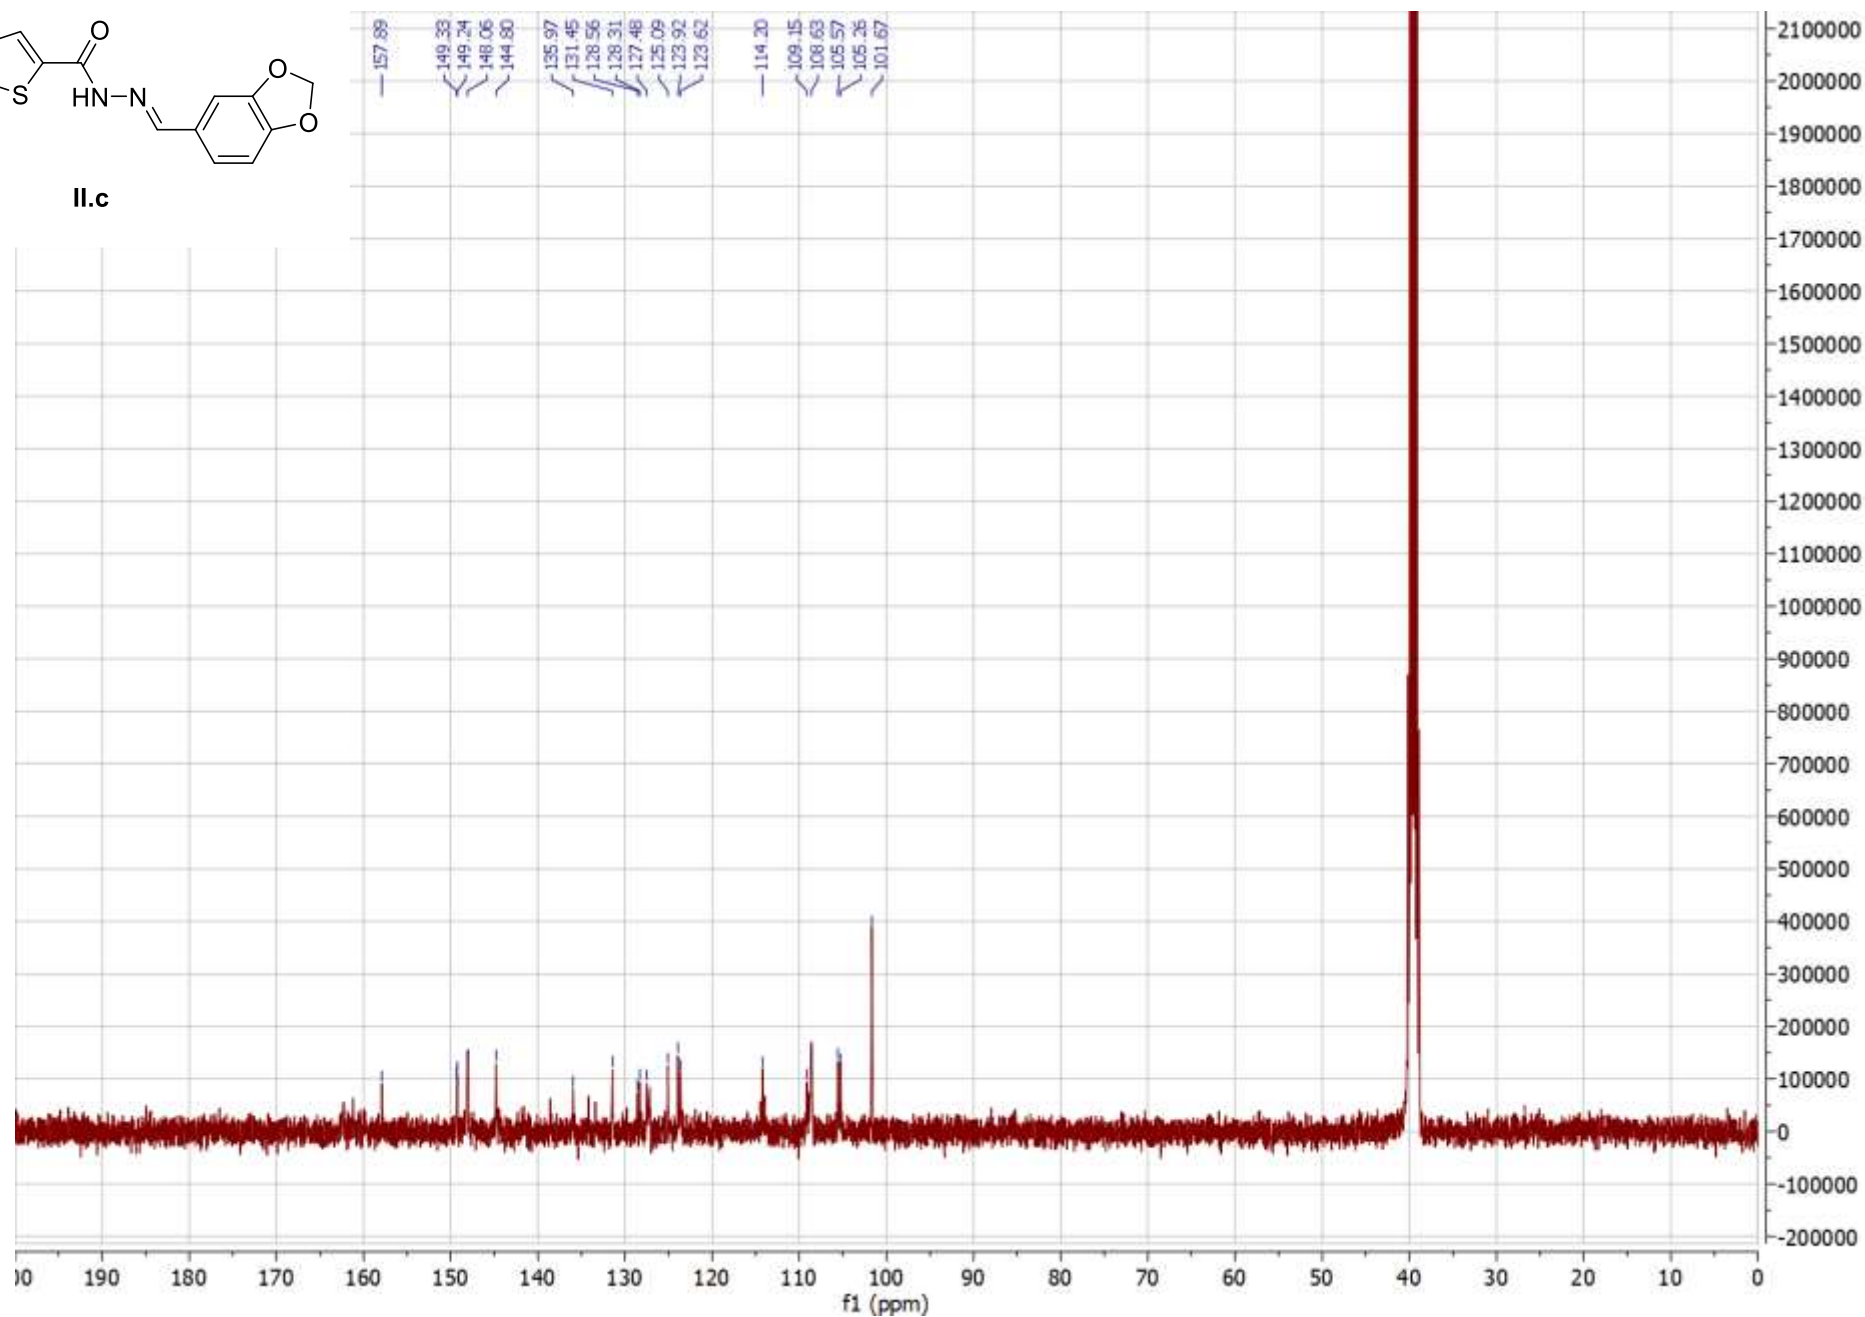

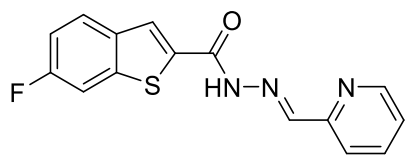

II.d

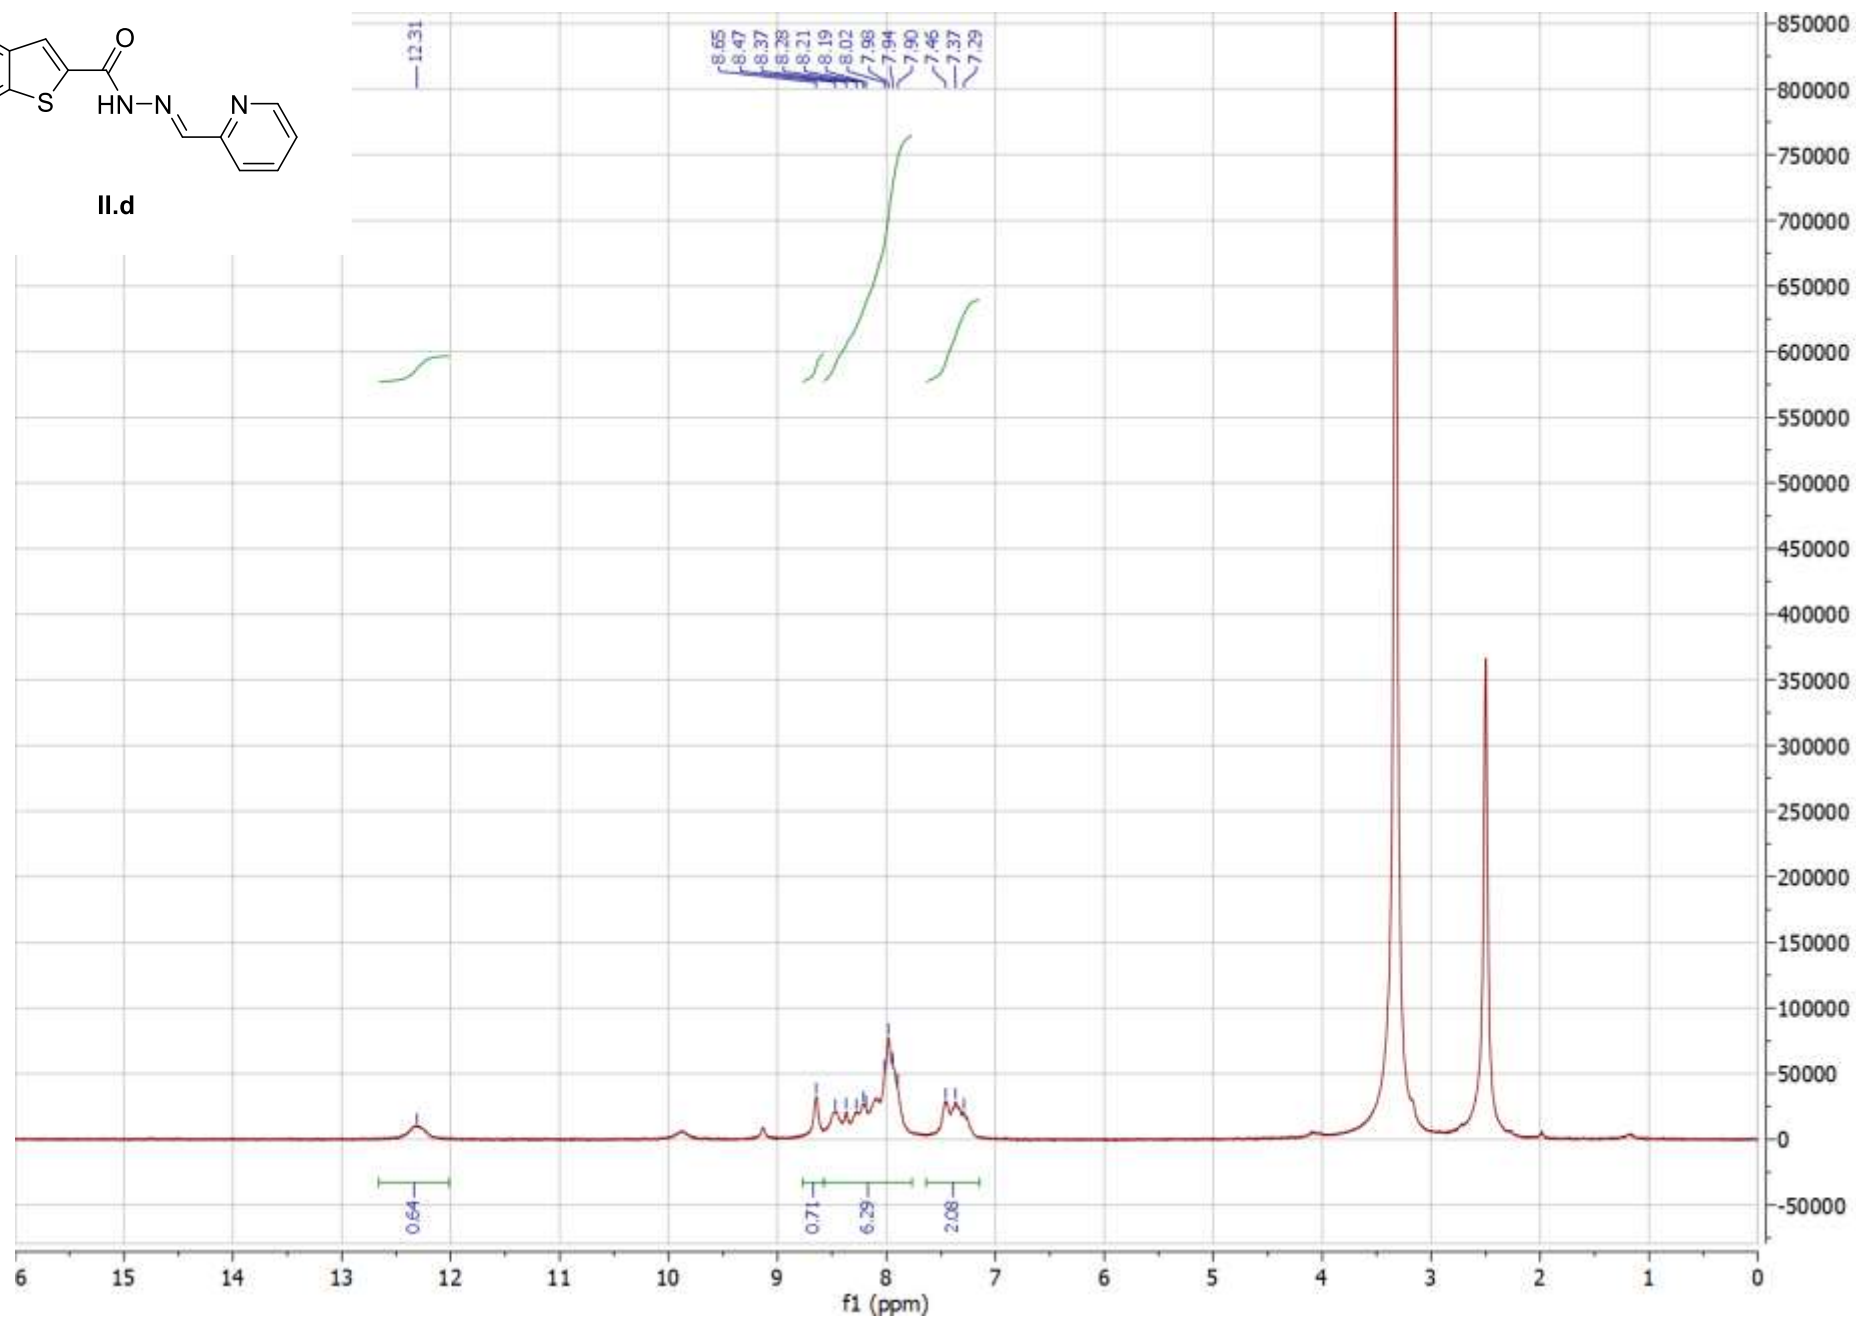

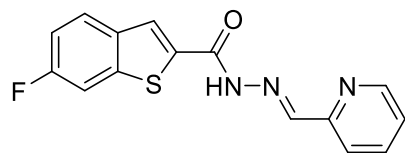

II.d

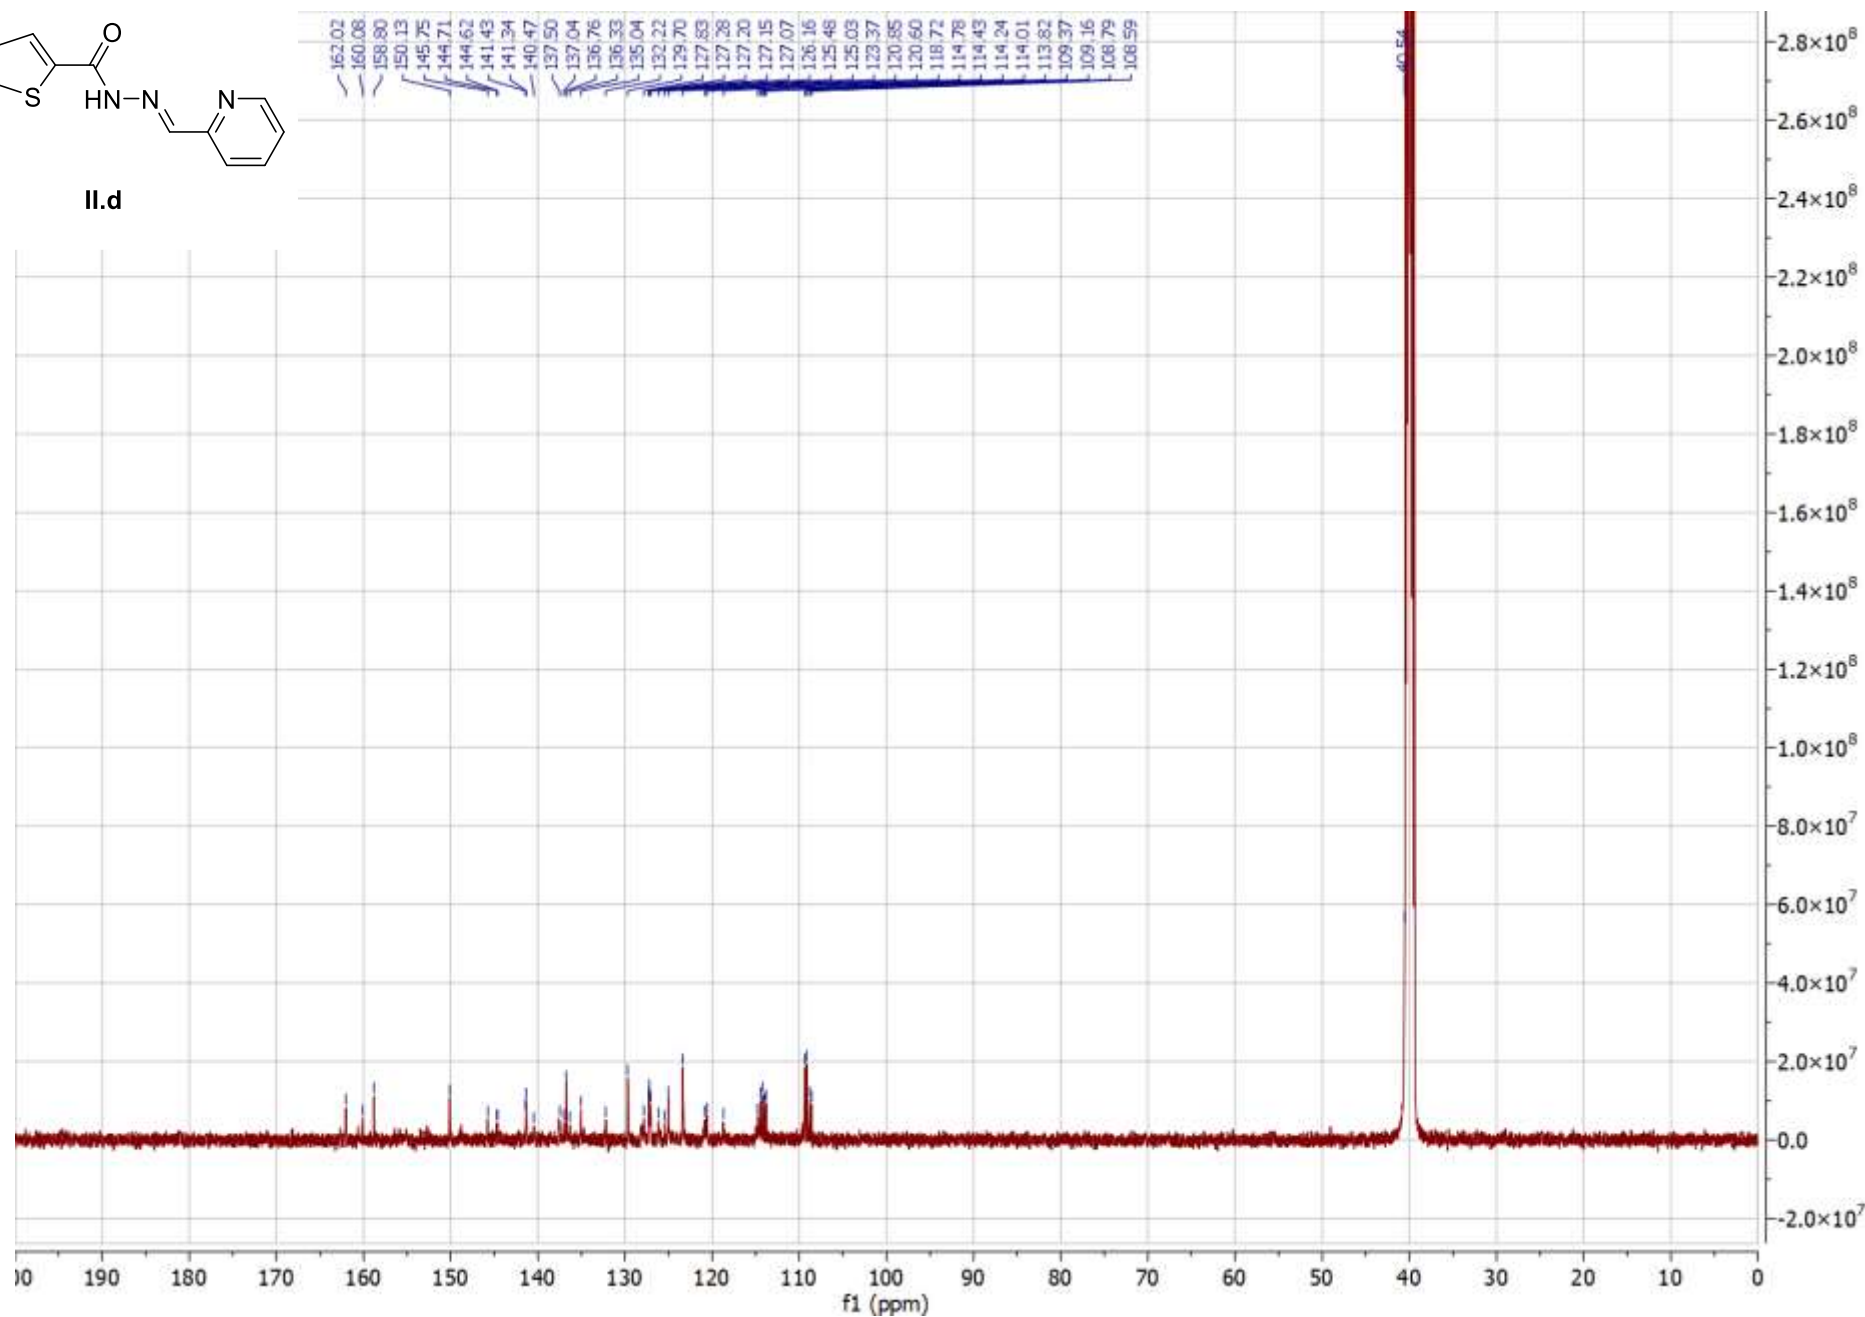

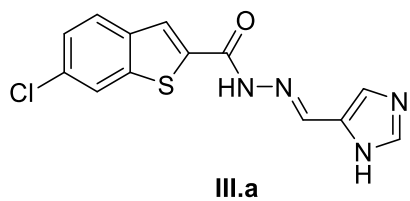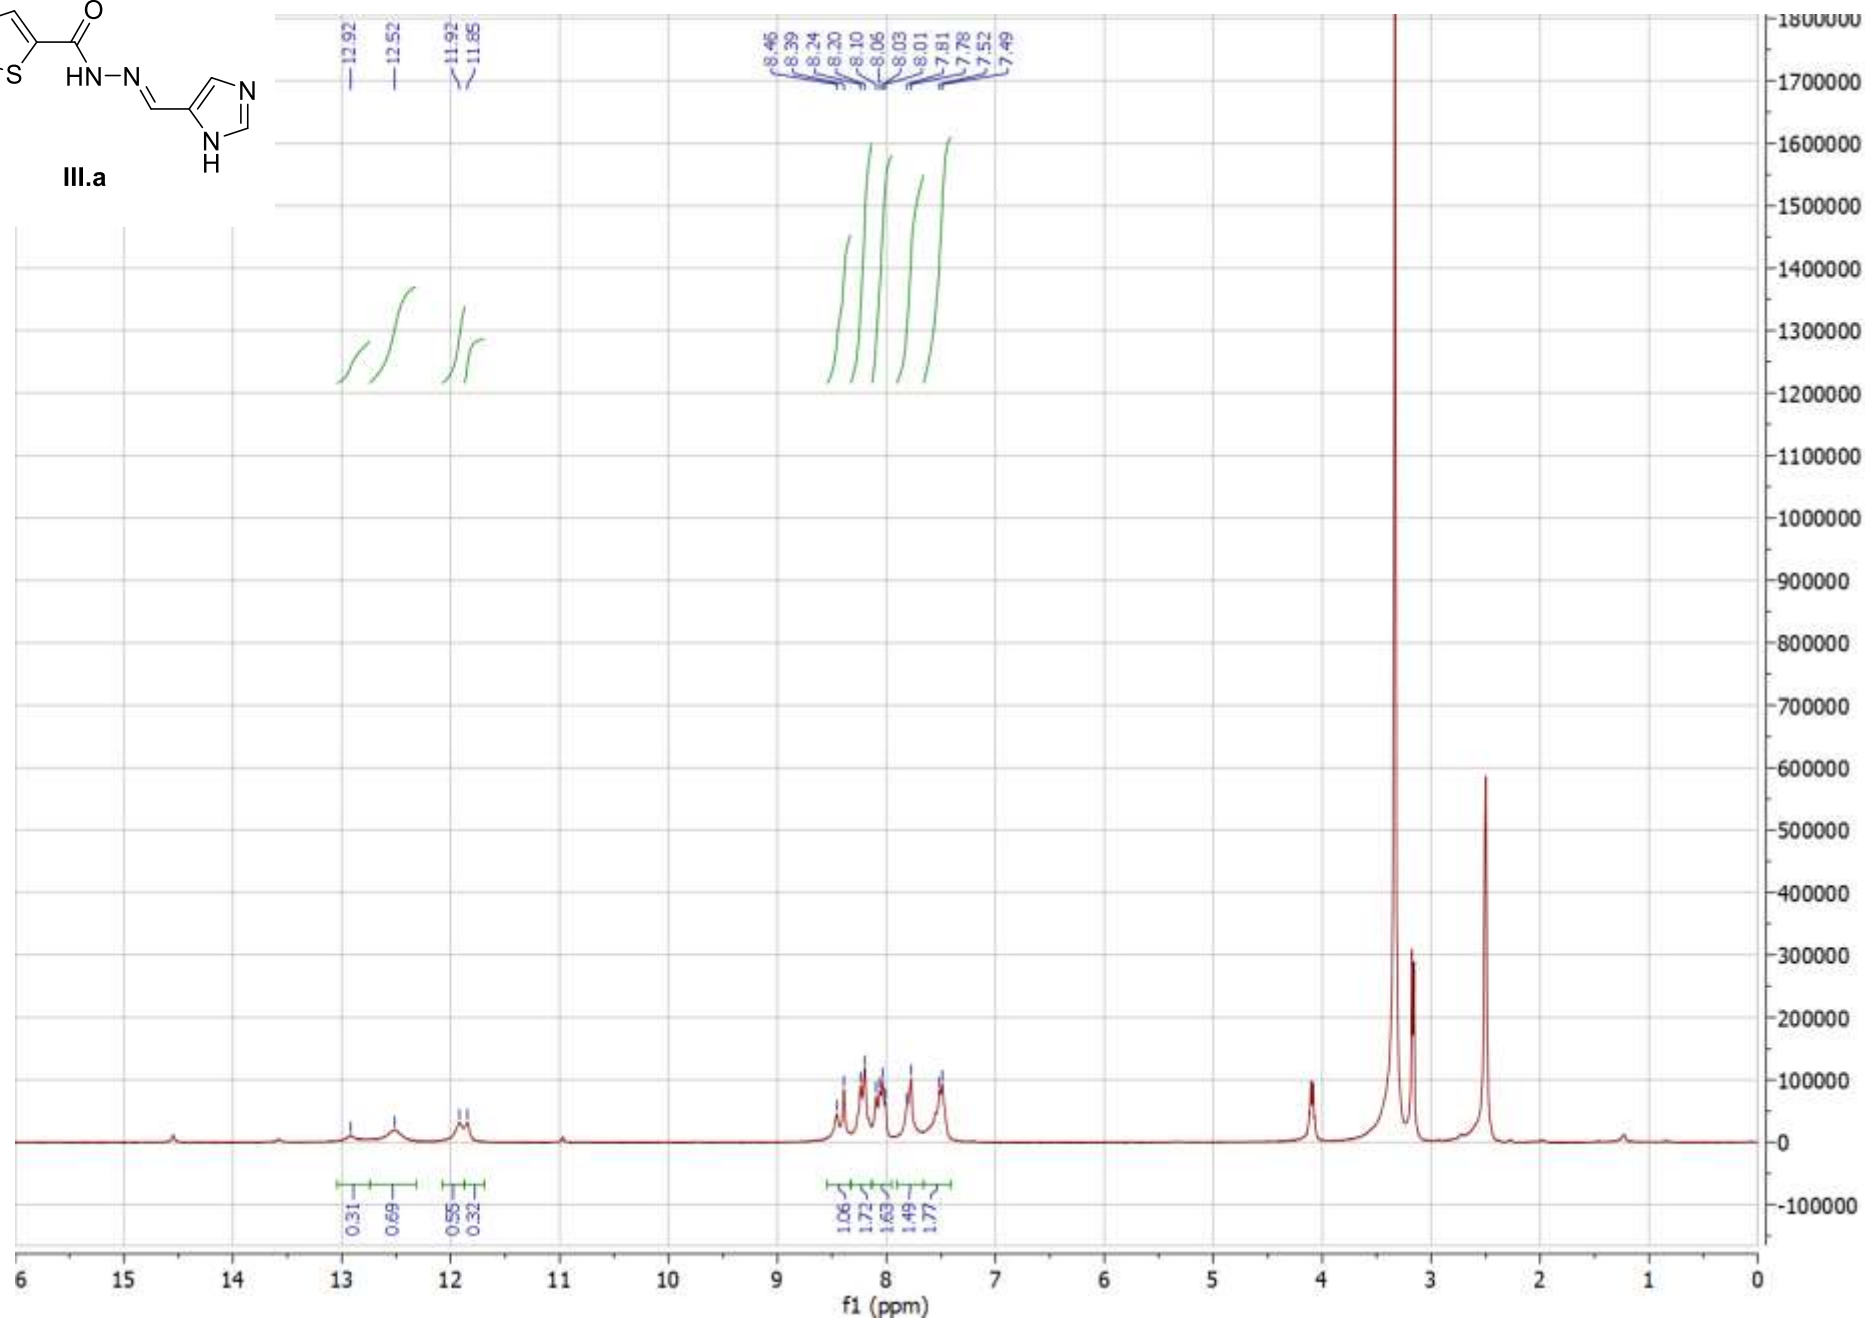

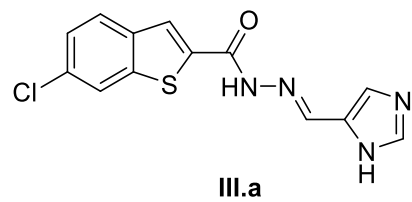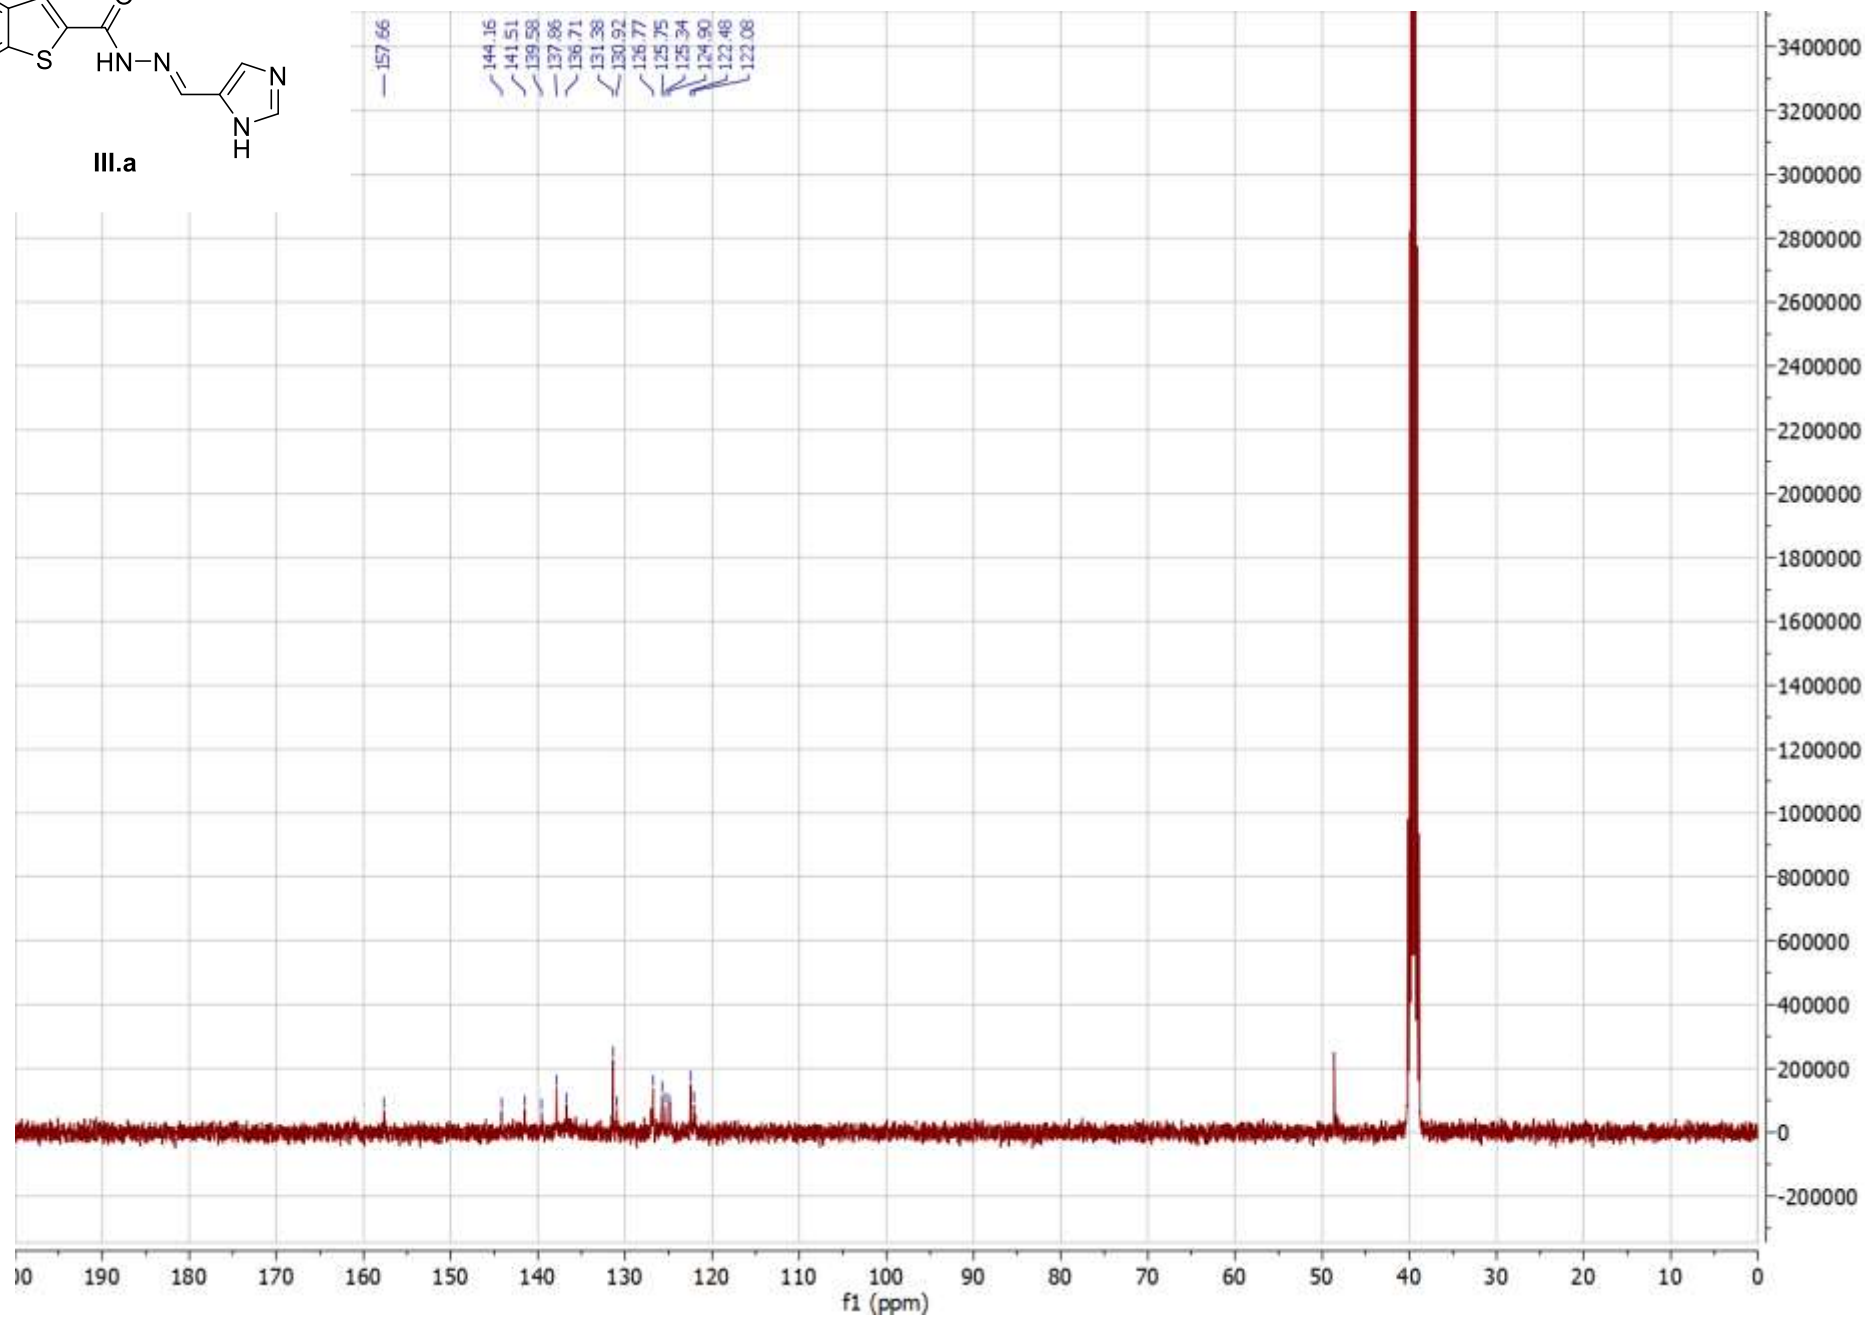

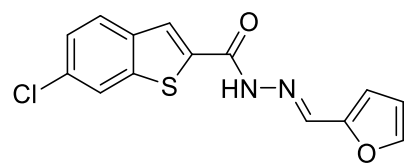

III.b

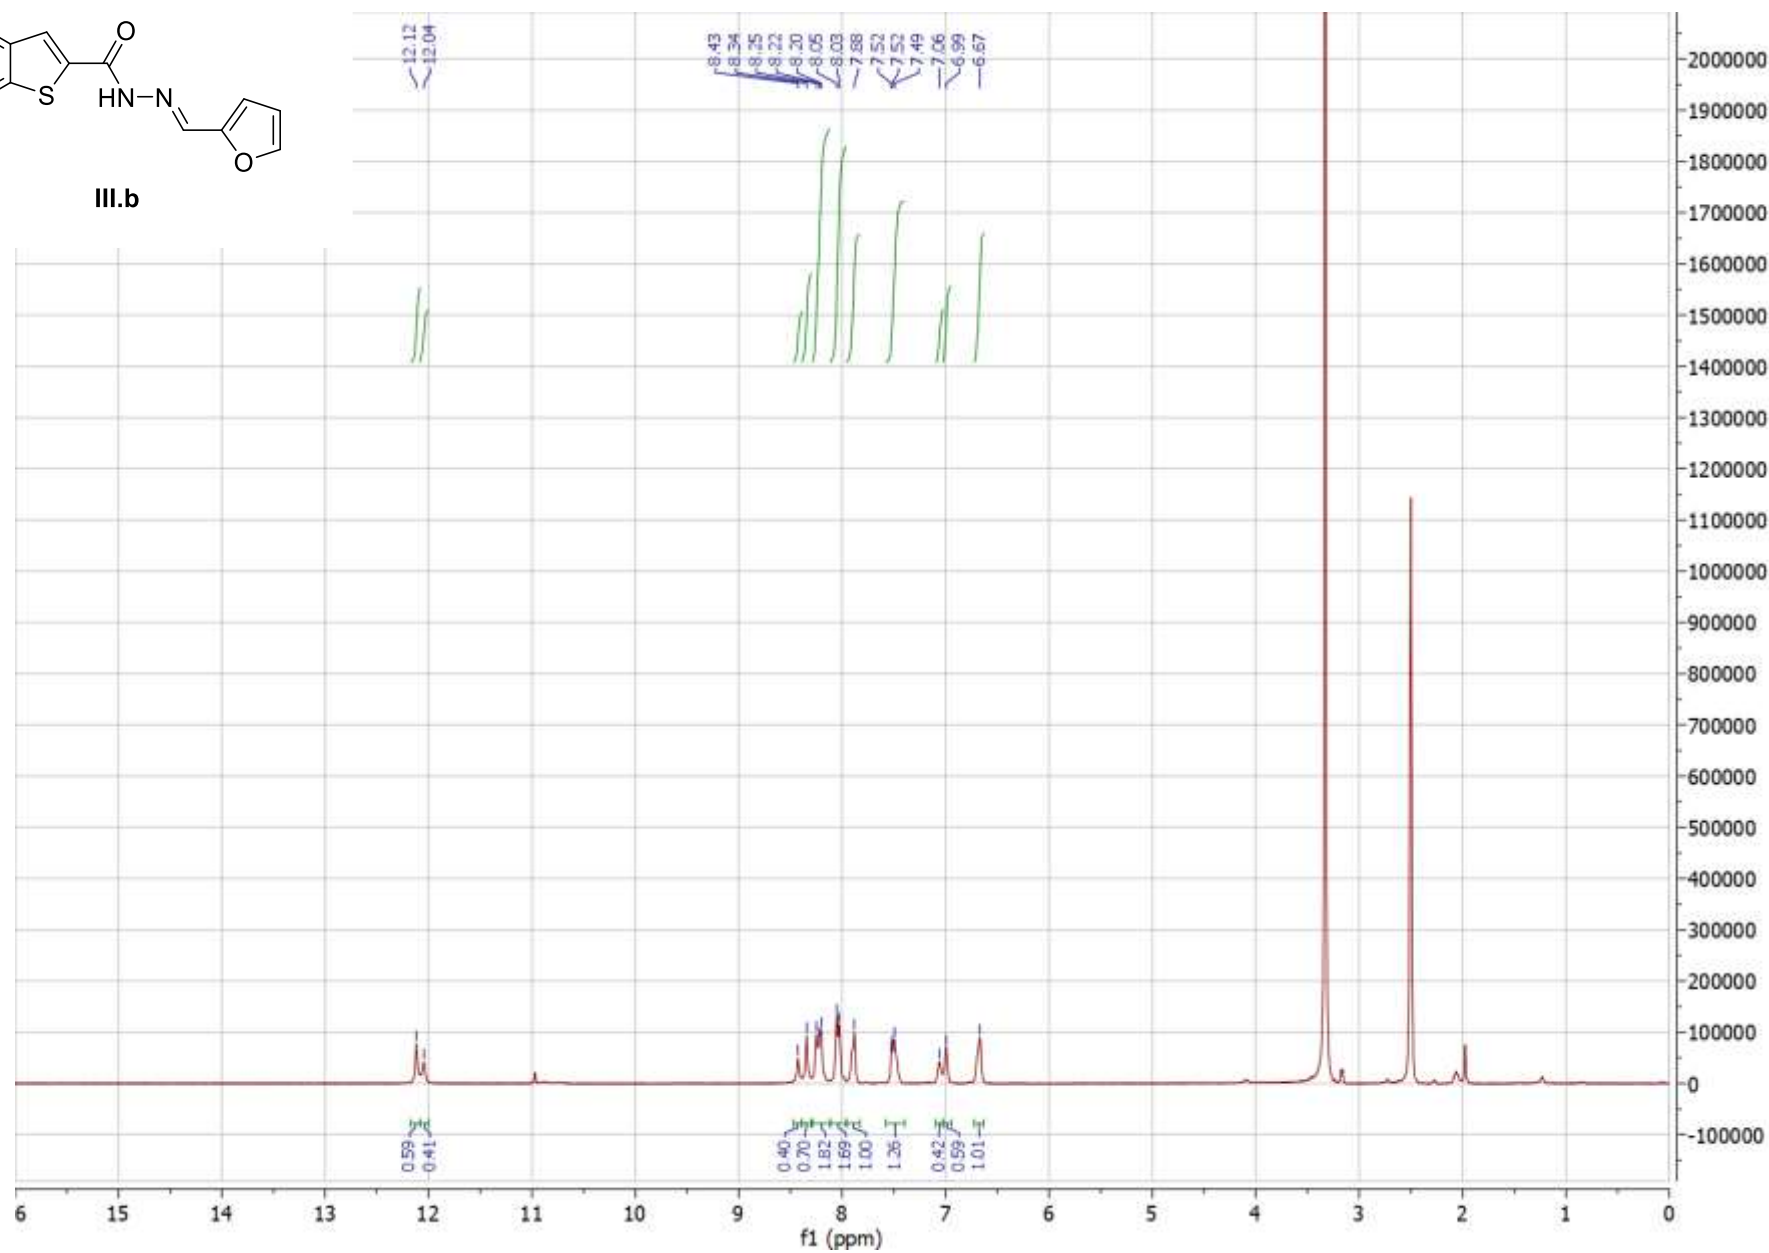

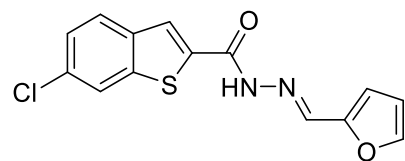

III.b

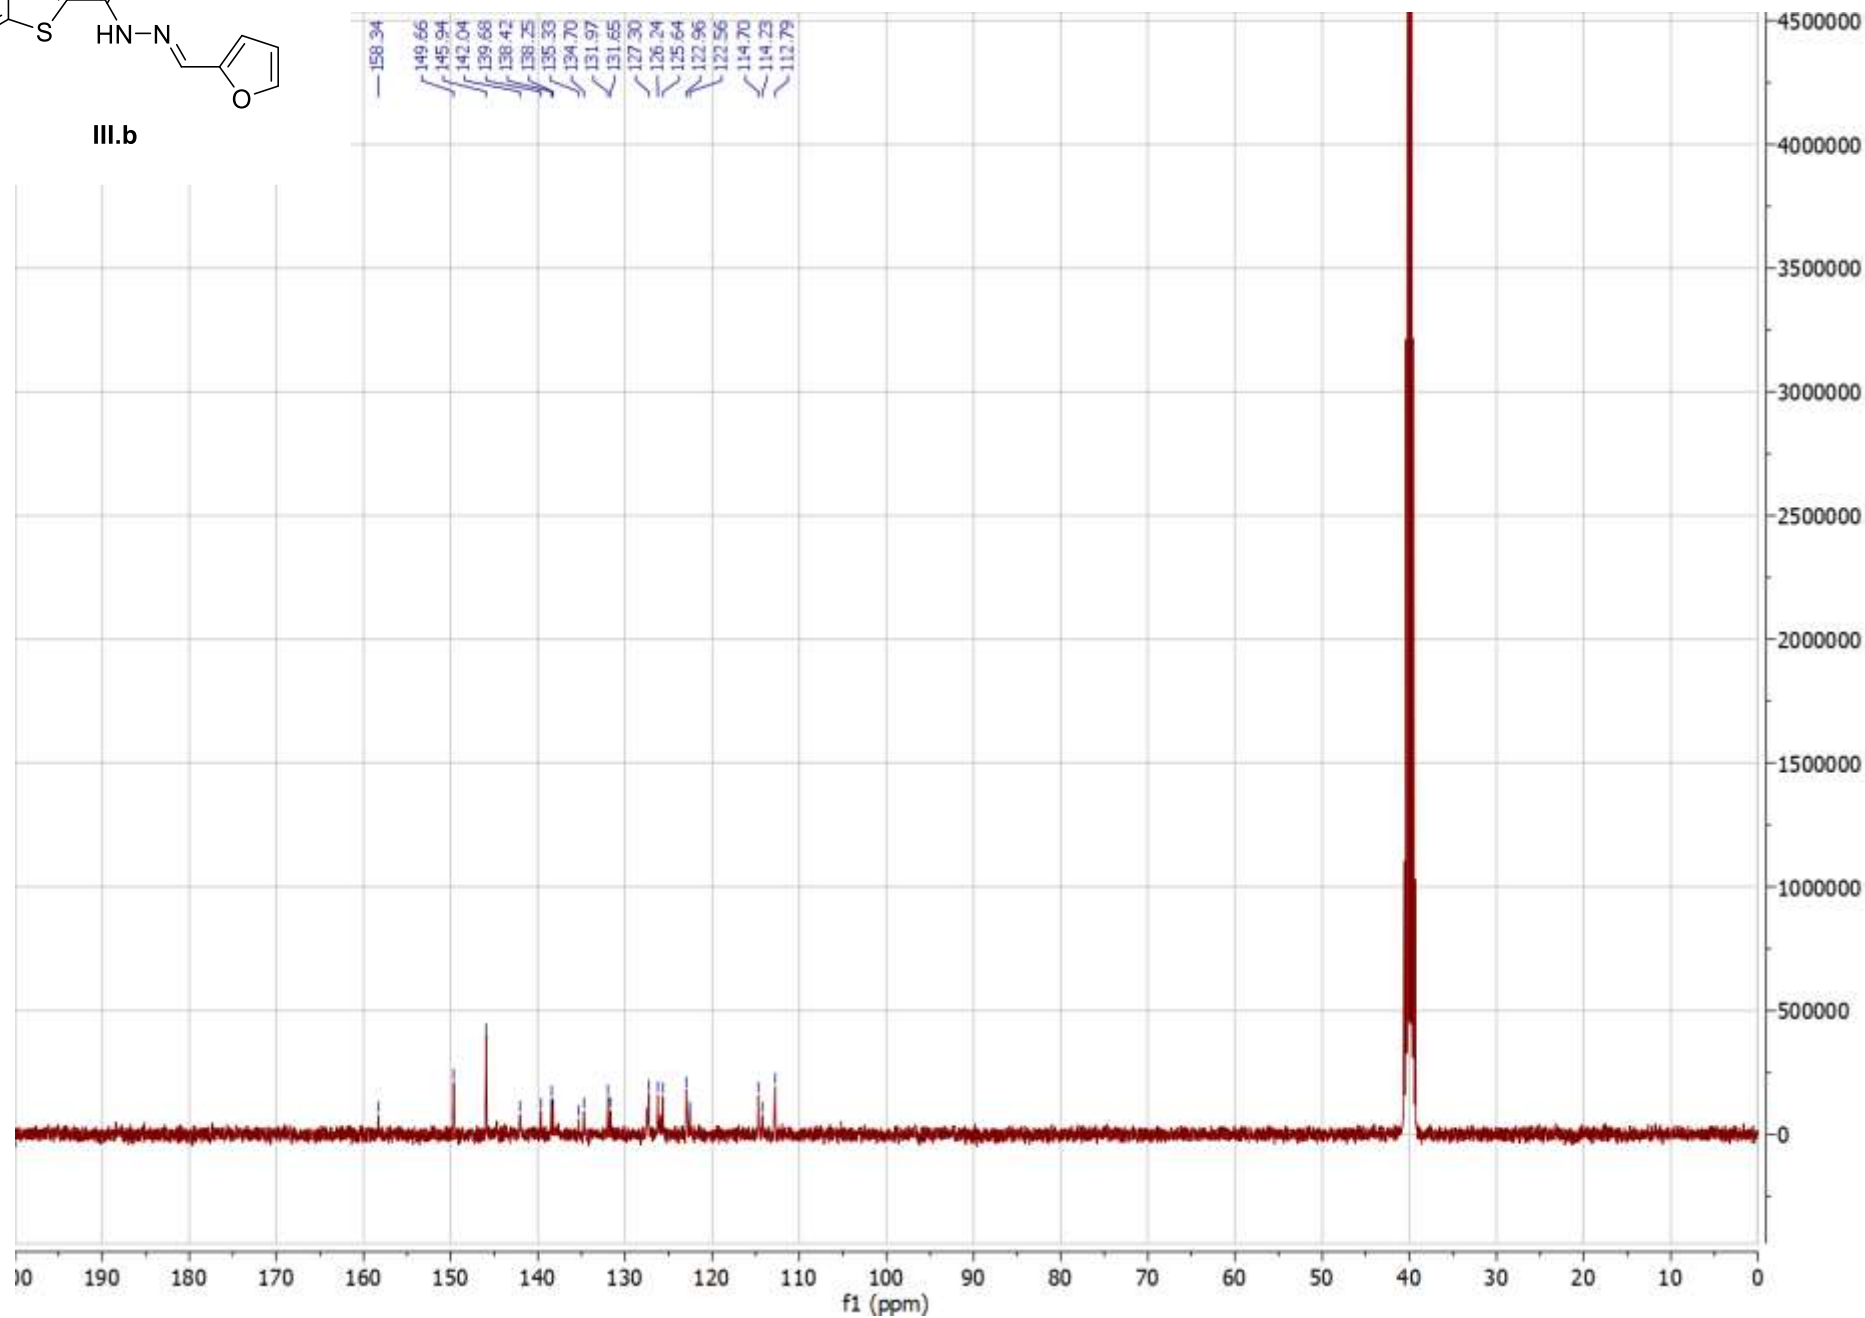



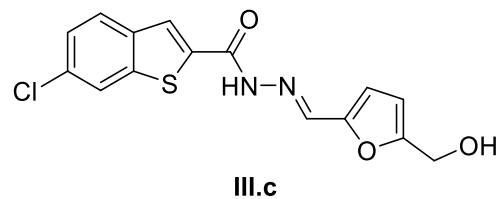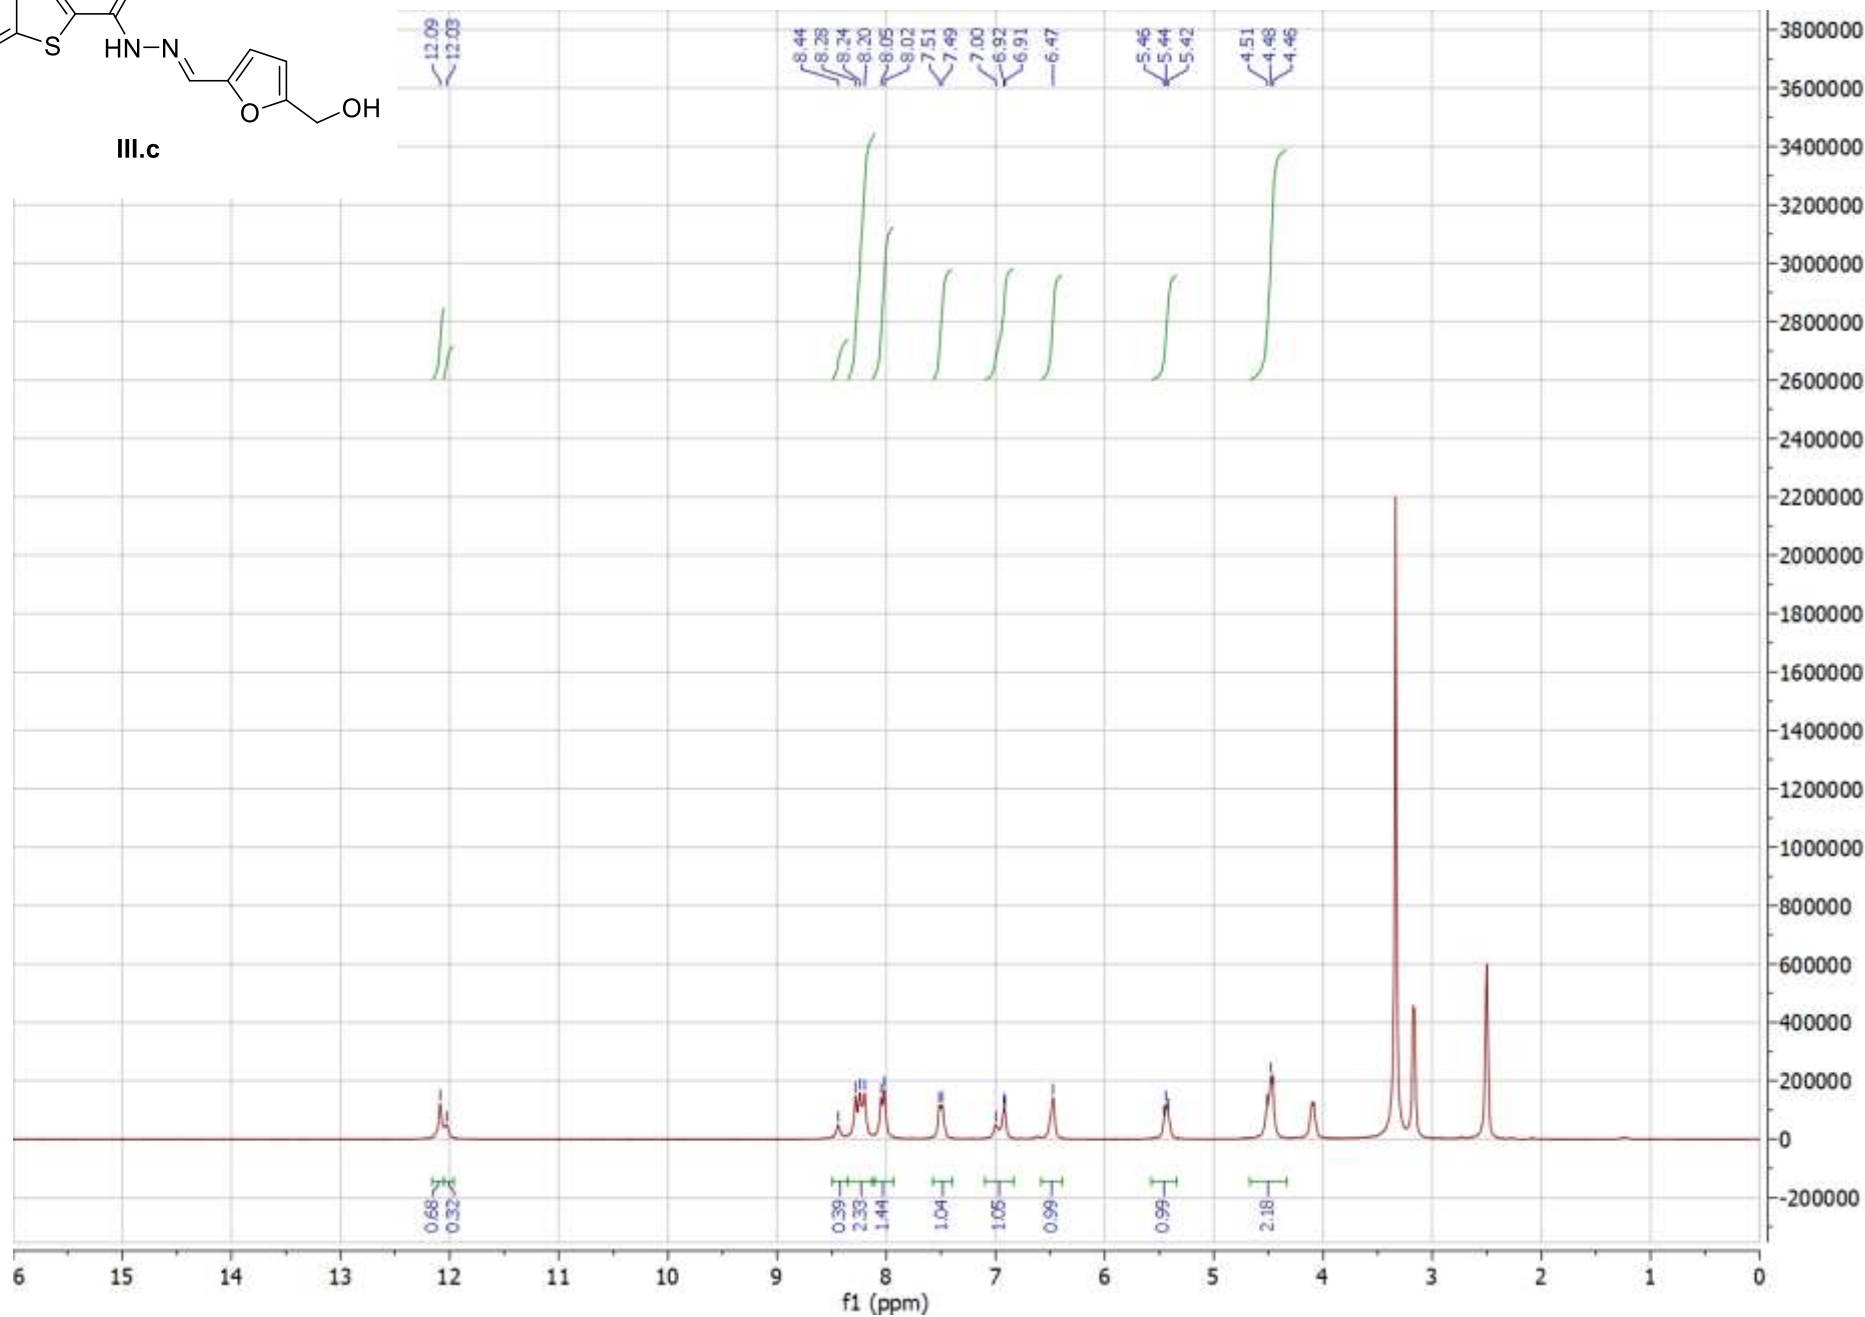



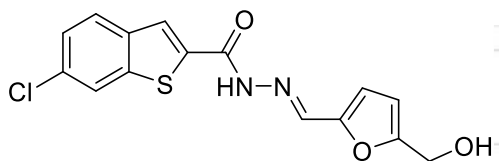

III.c

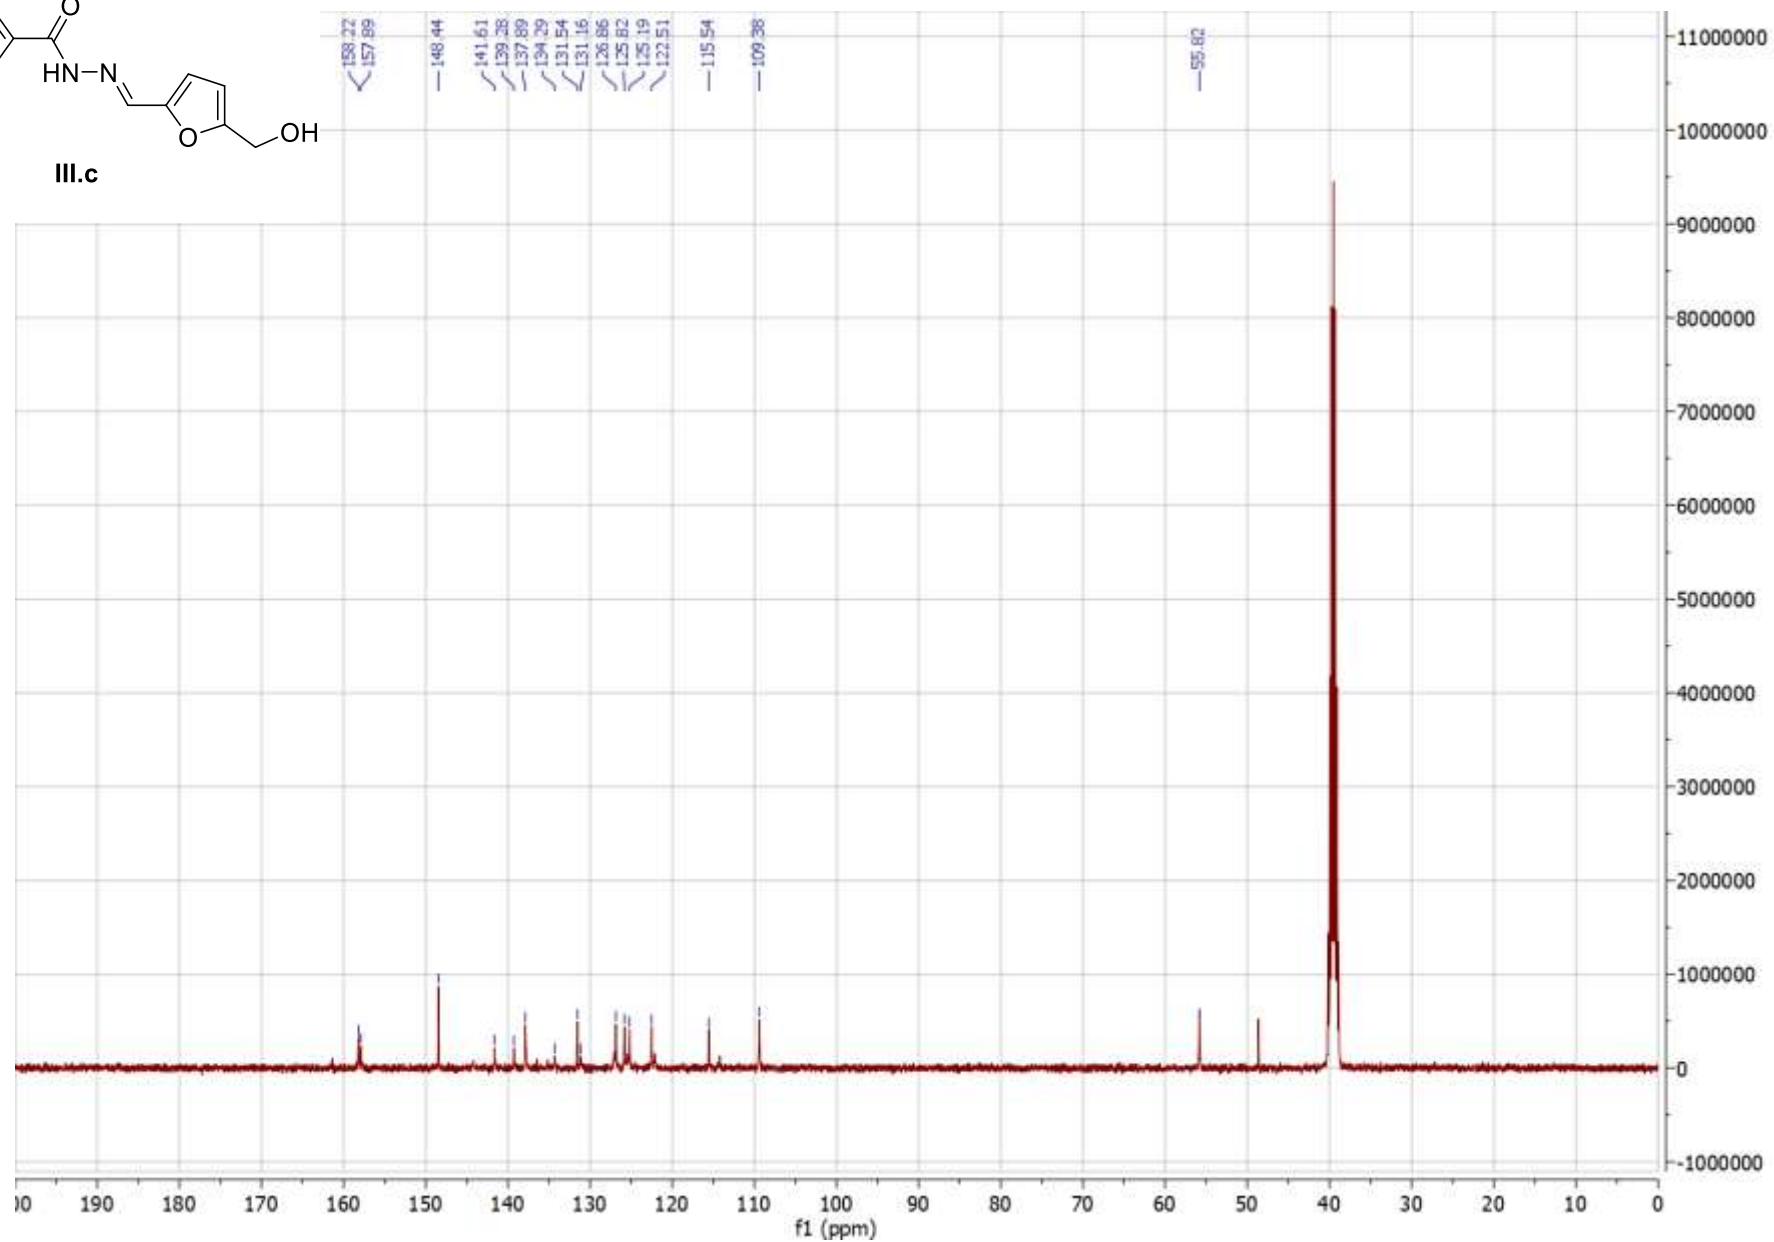

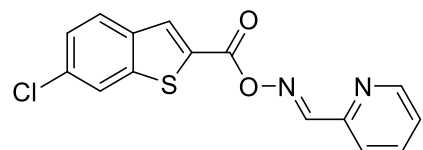

III.d

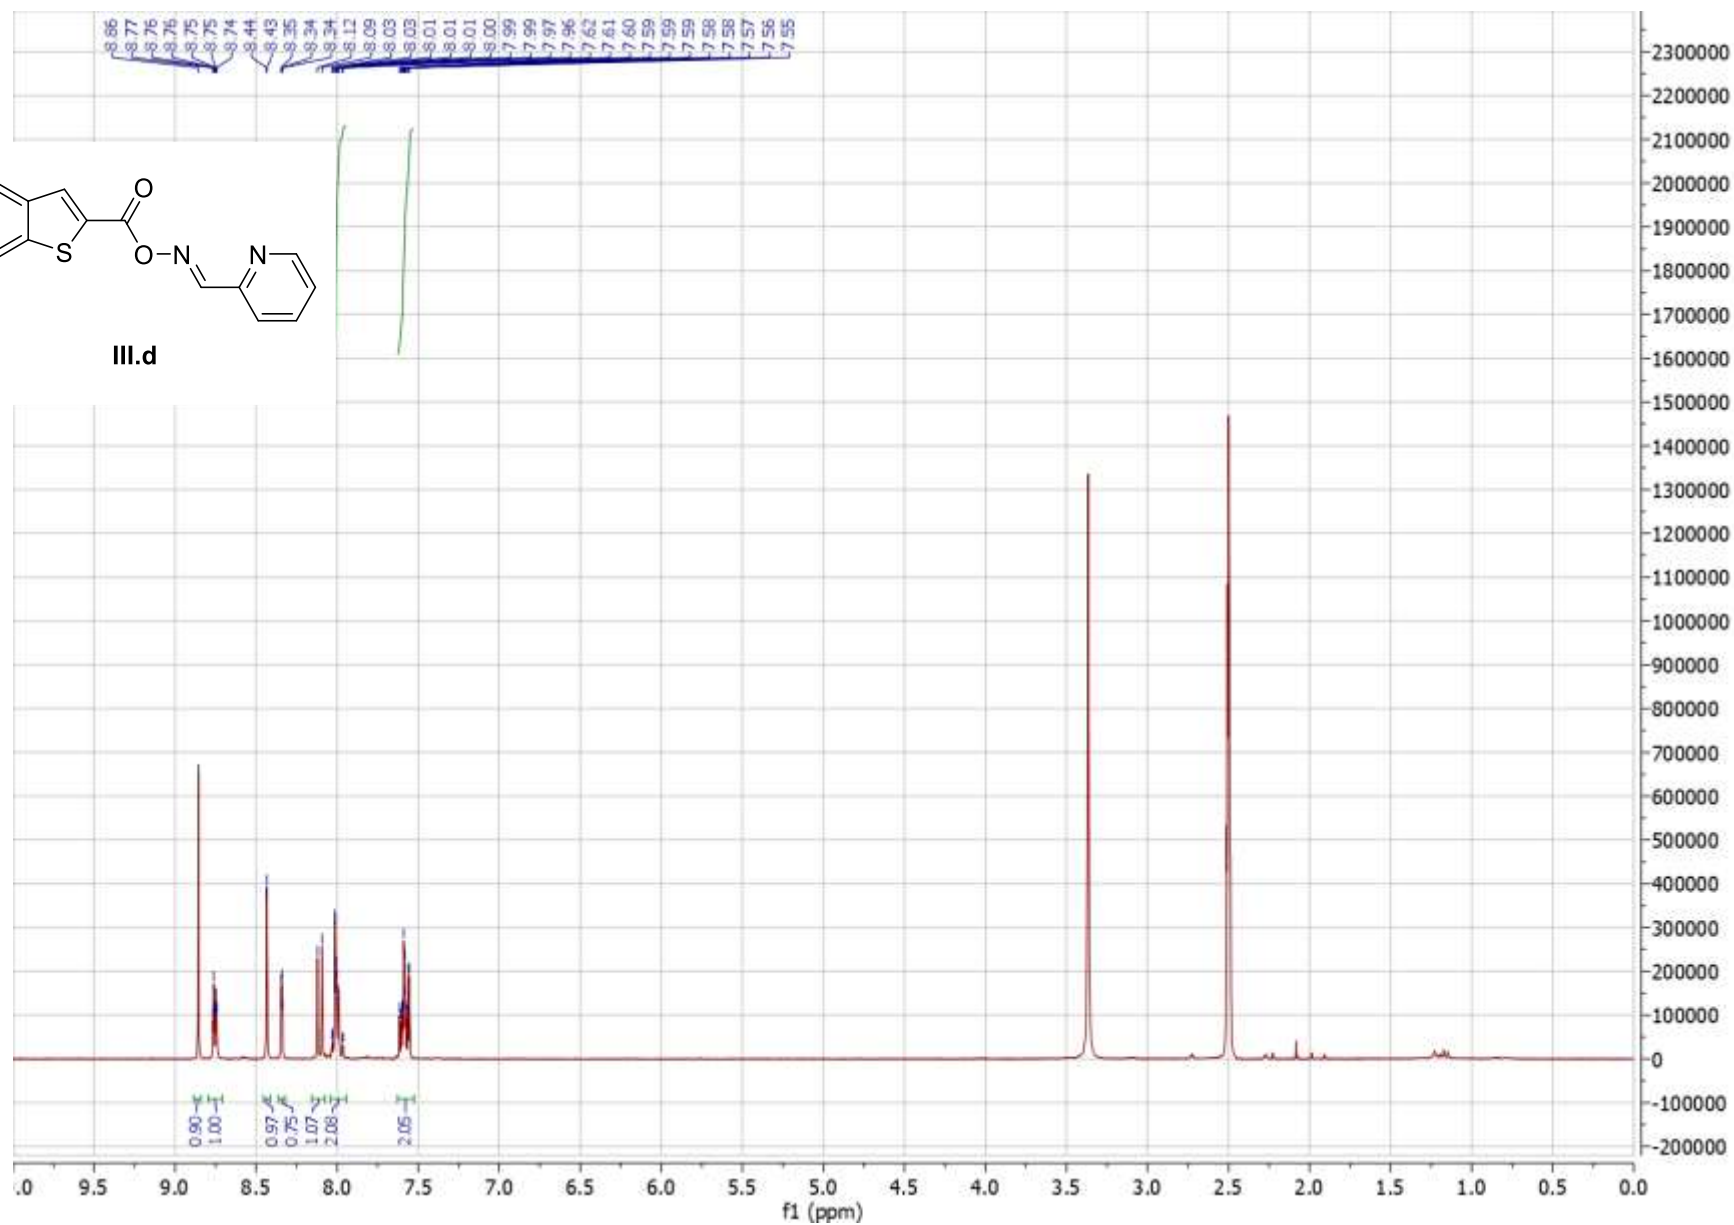

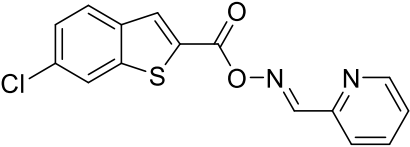

III.d

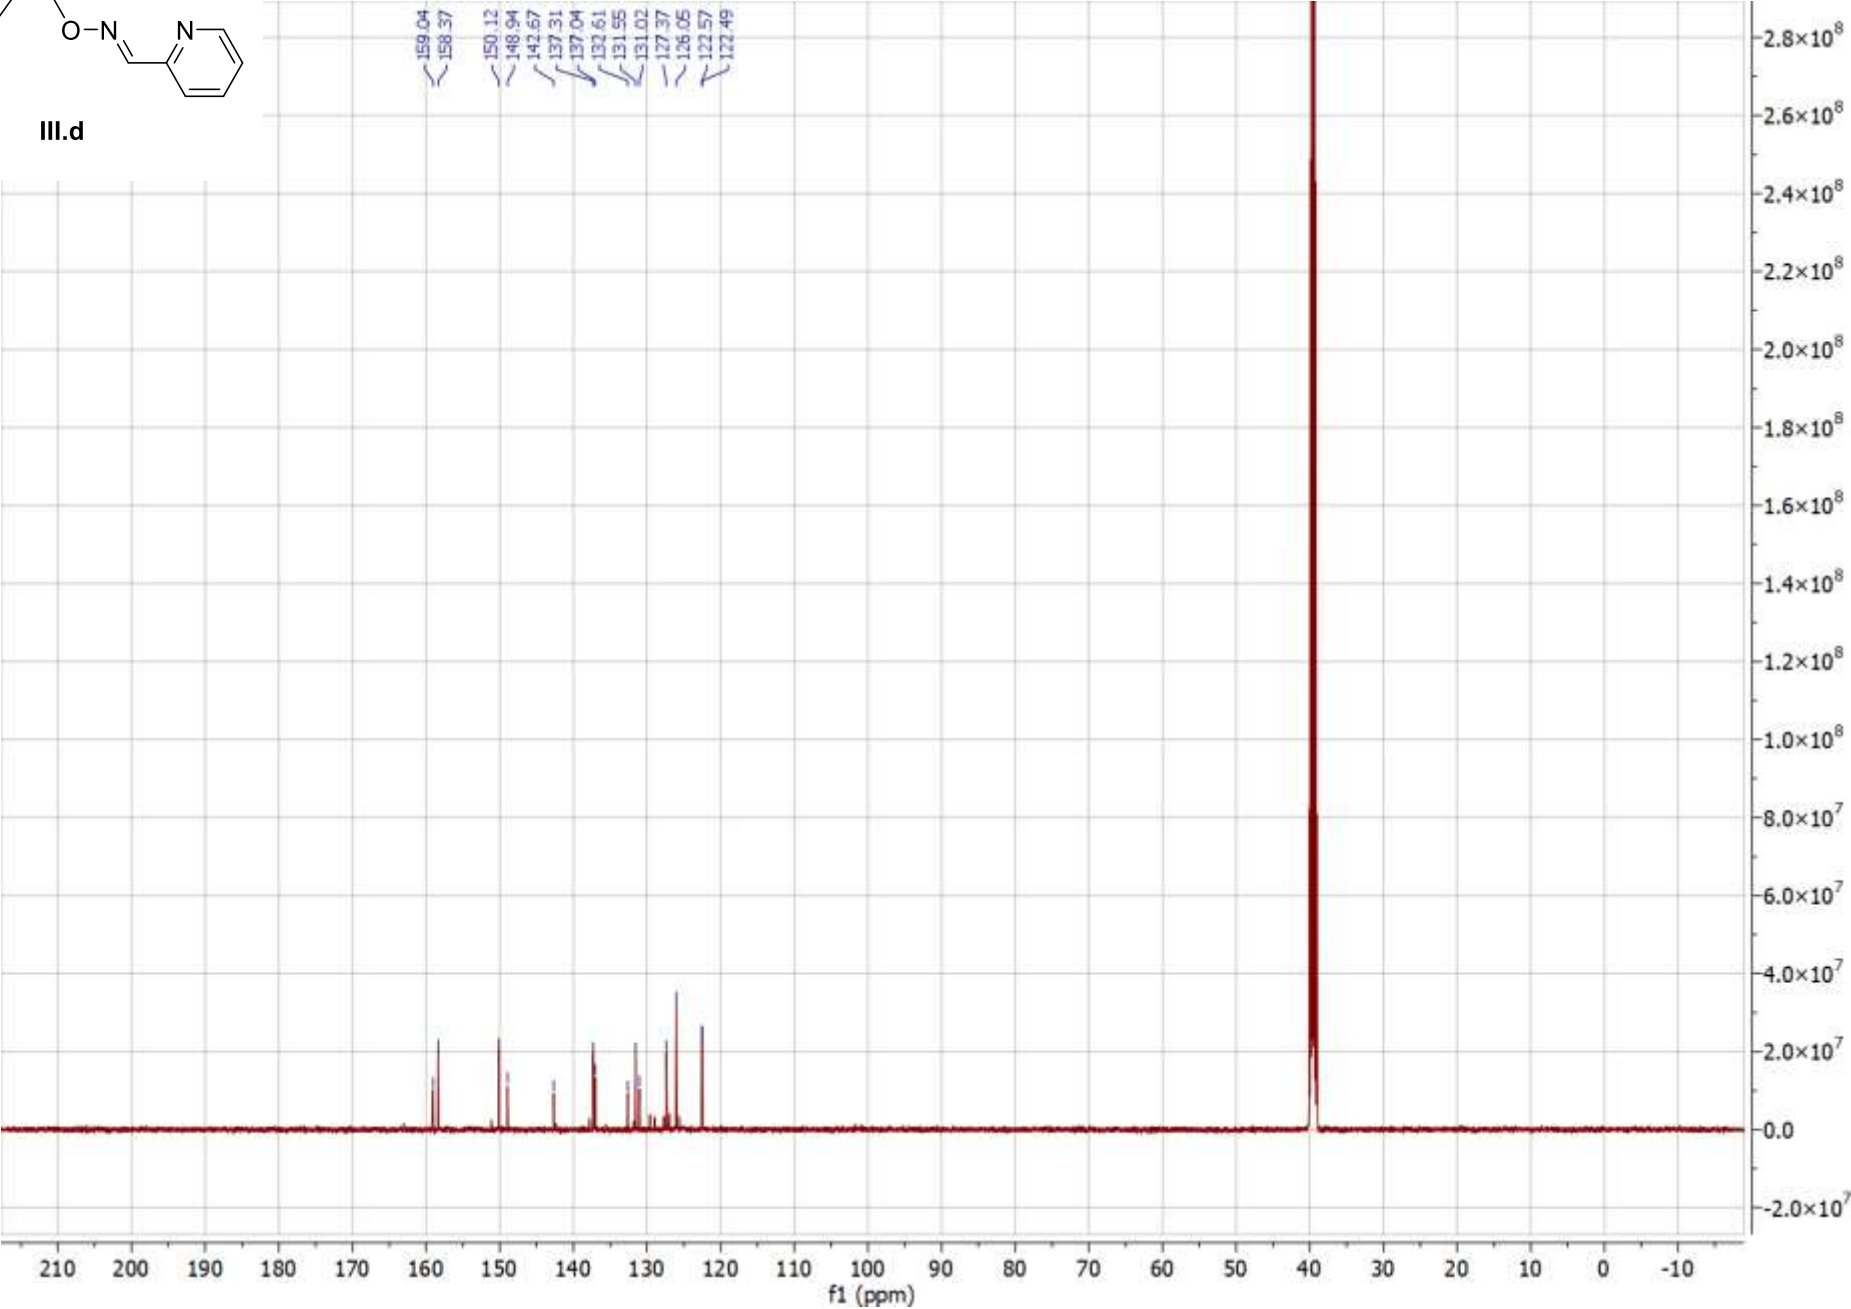

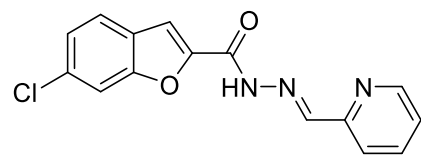

III.e

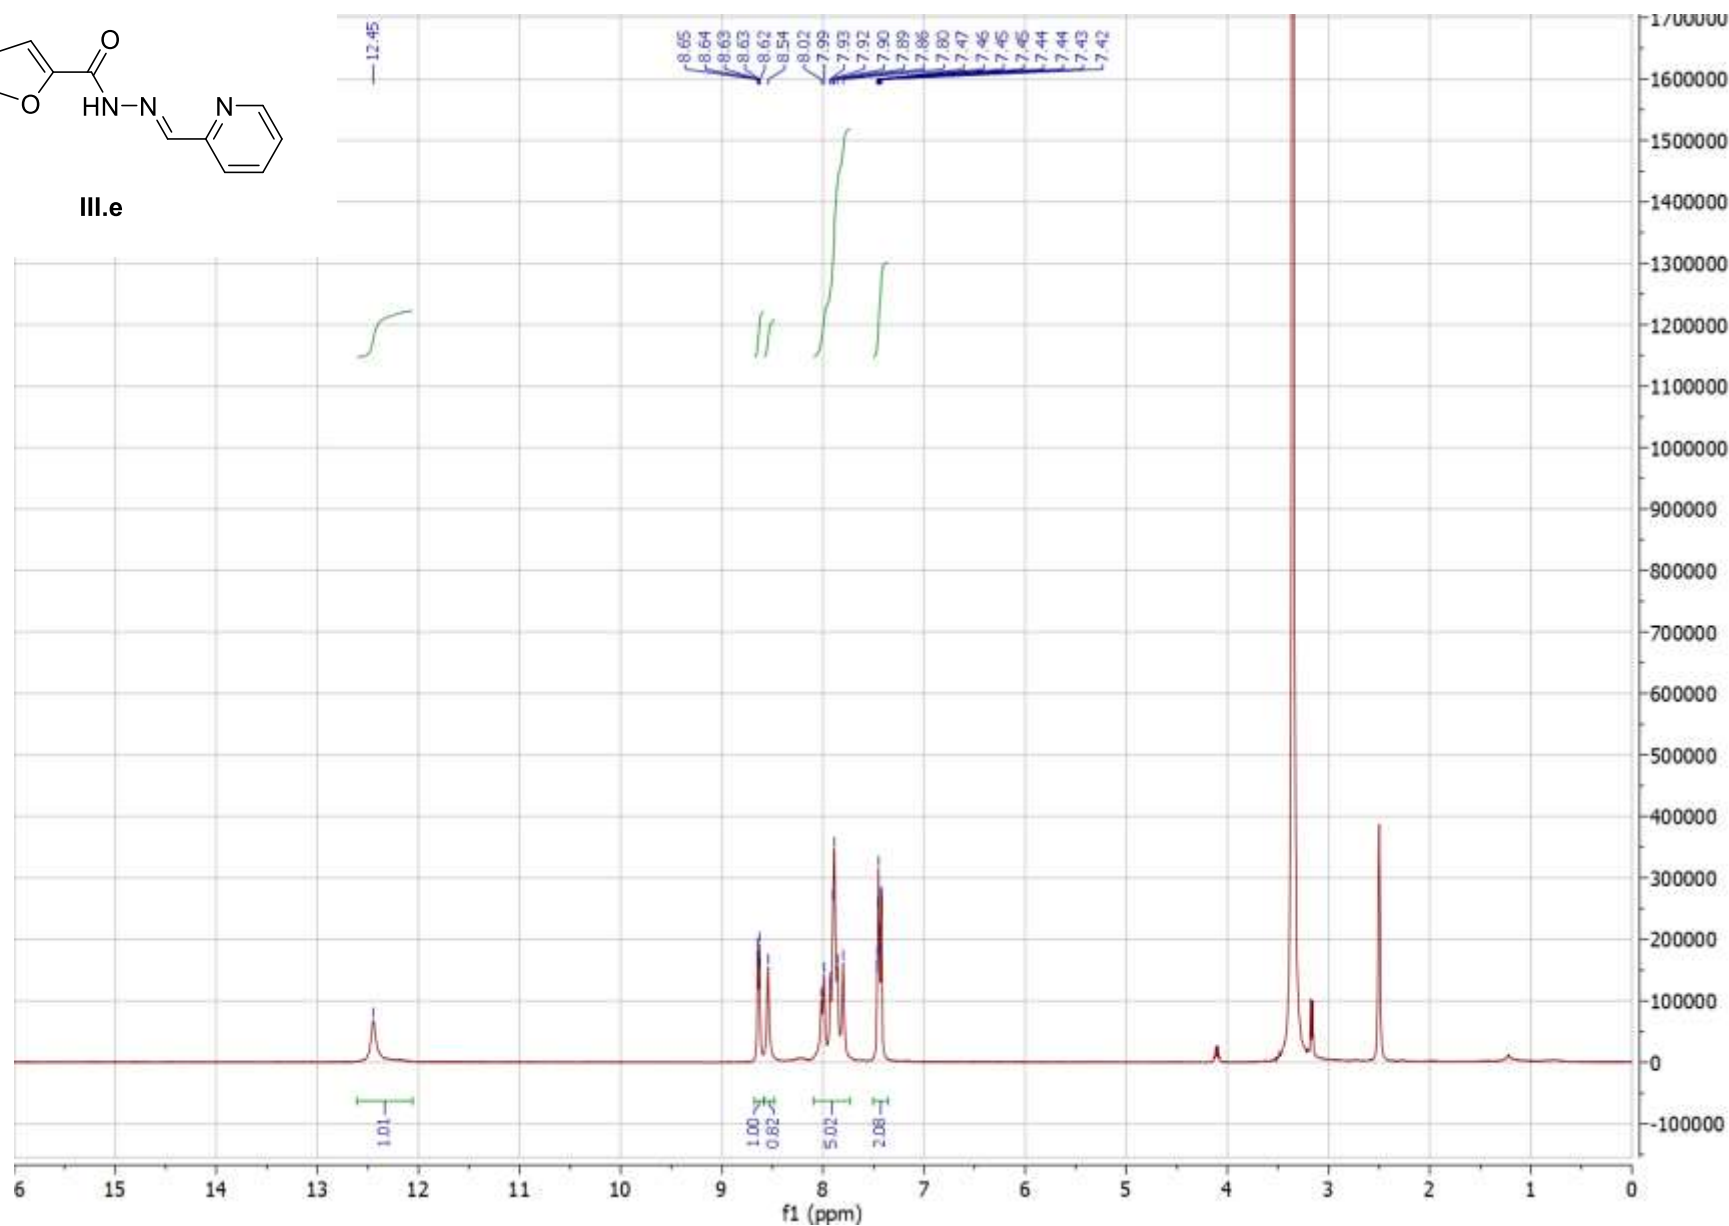

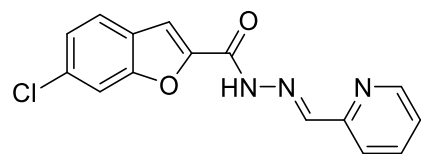

III.e

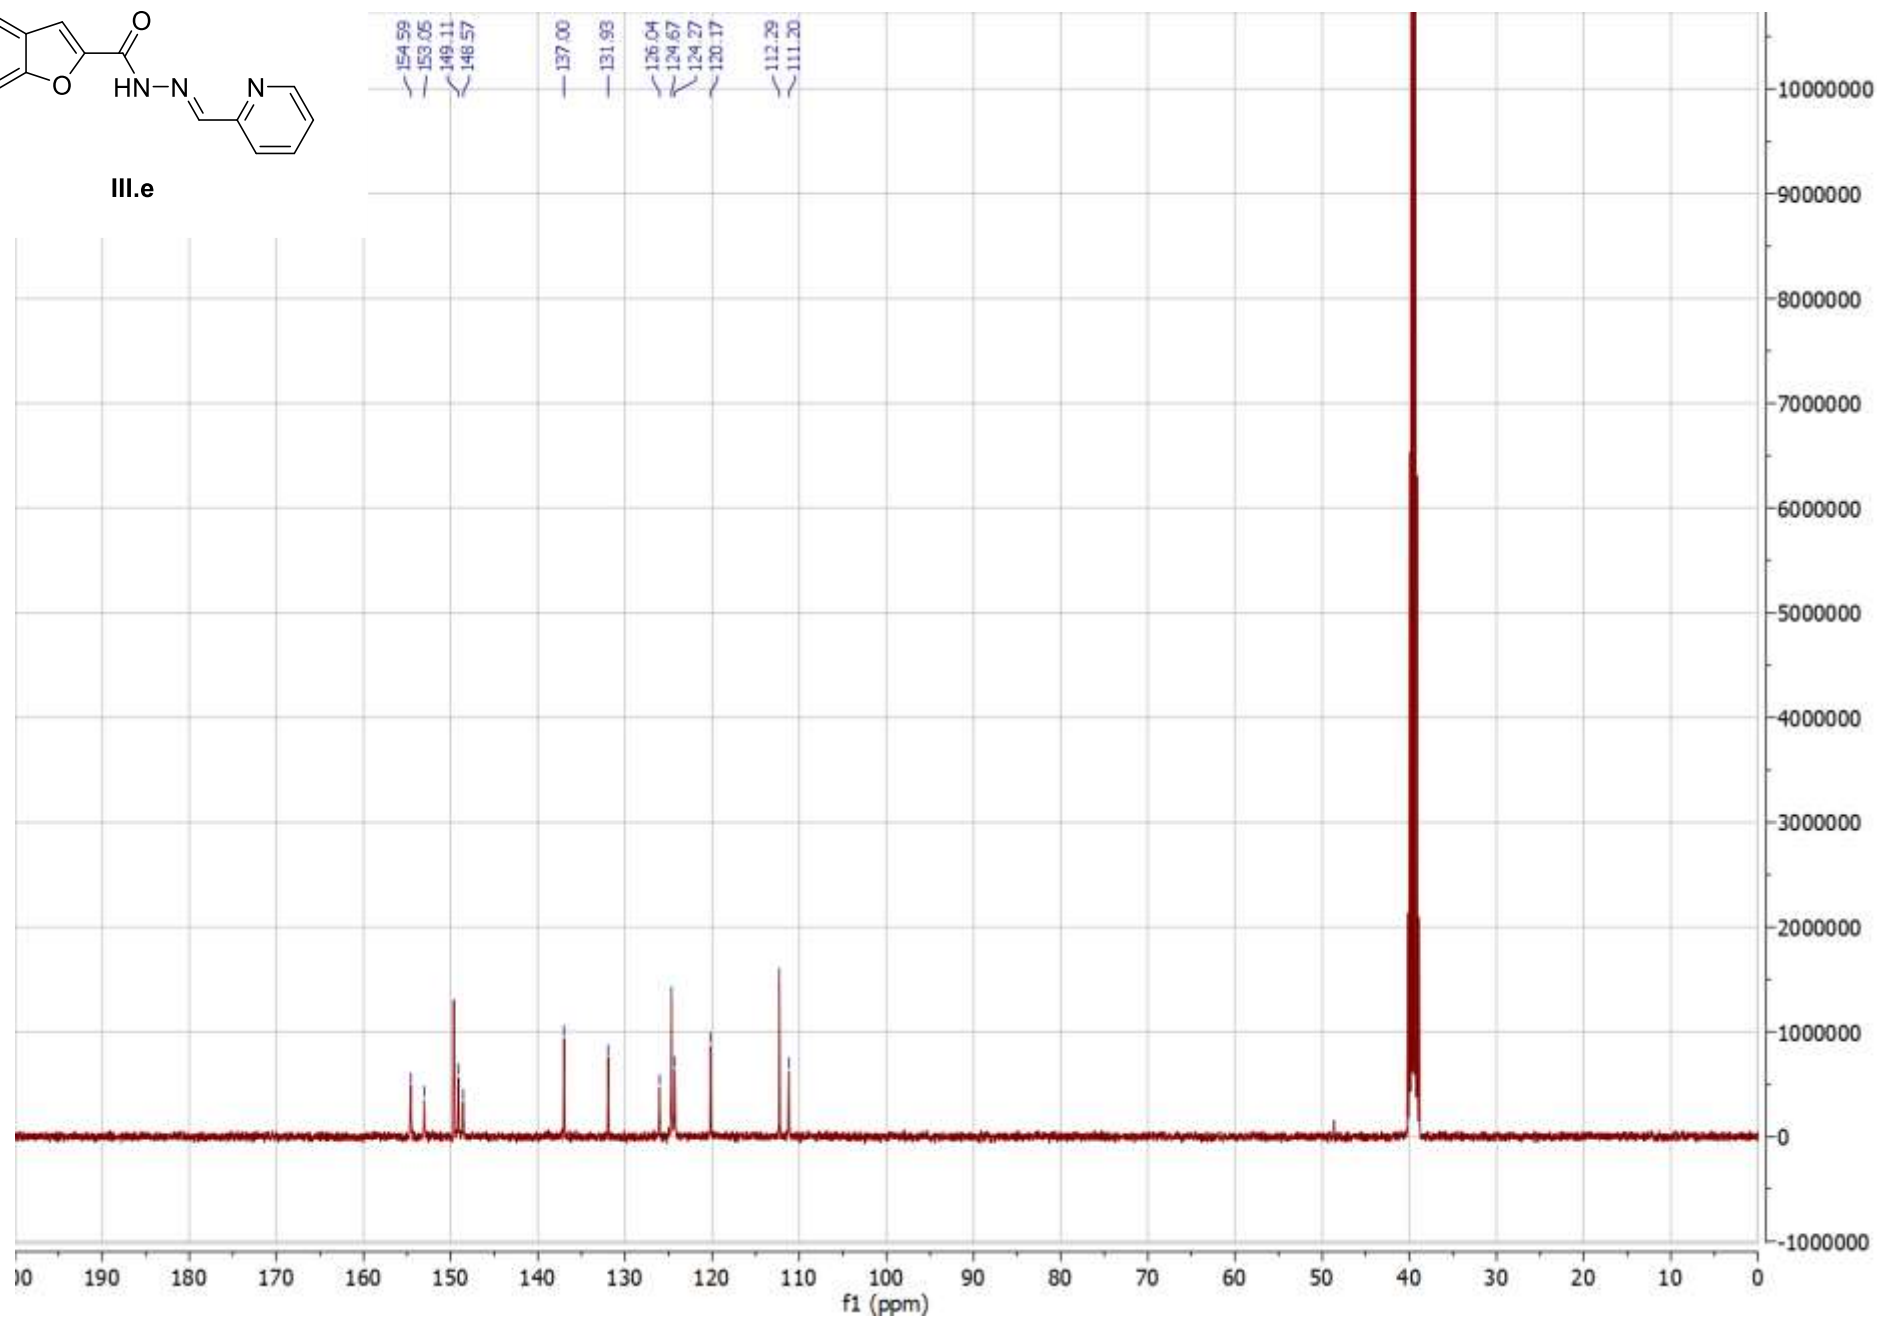

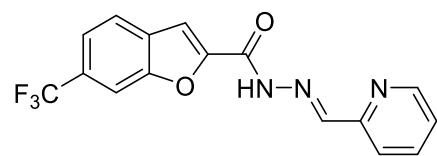

III.f

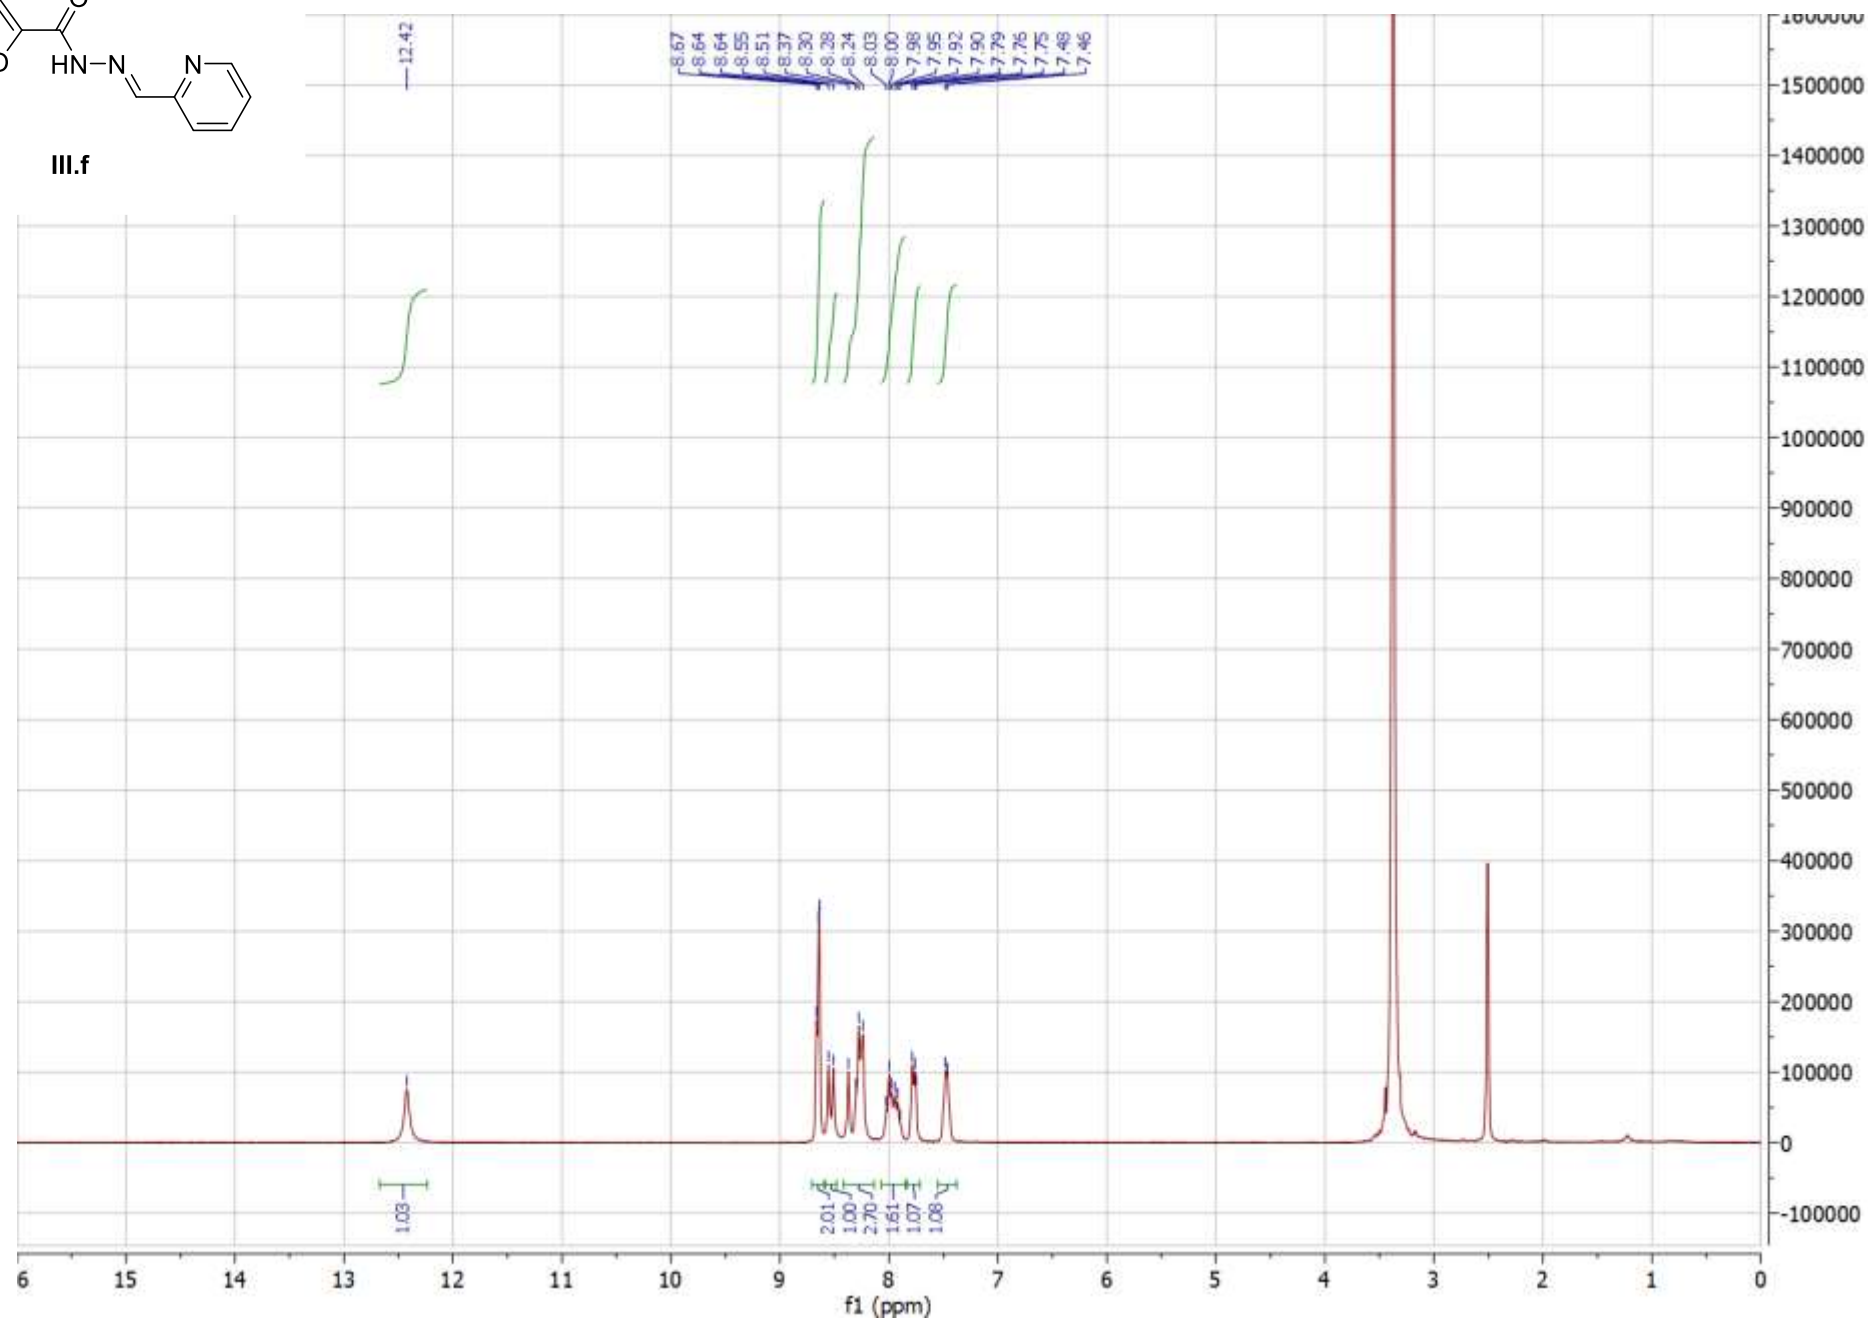

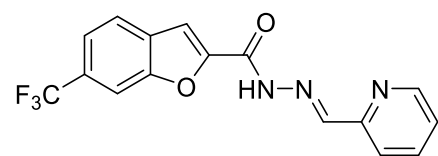

III.f

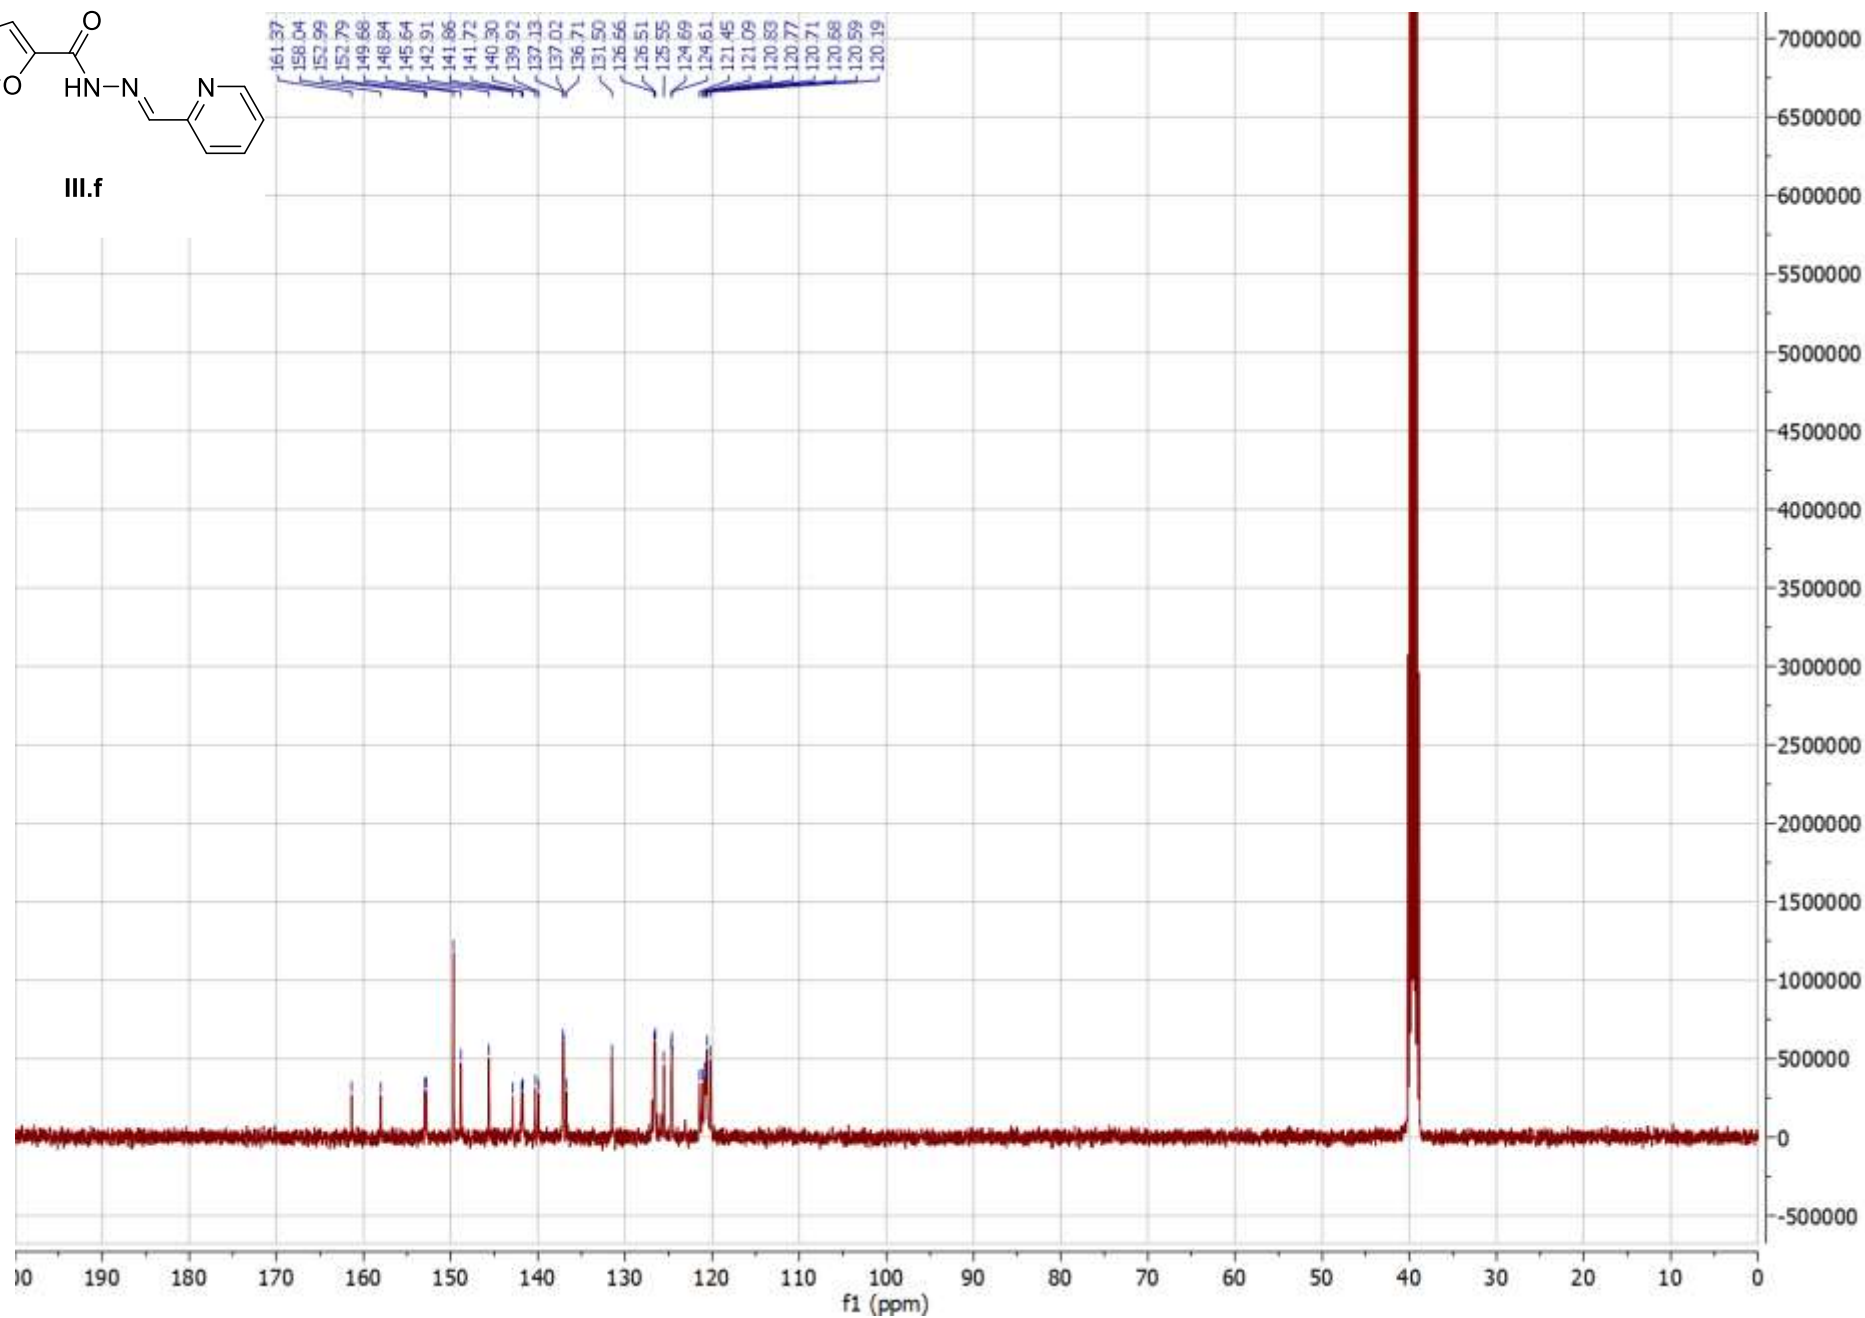

Supplement: s1 [file s1]
